# Supplementary material
Source: publisher figshare collection journal article supplement (https://acs.figshare.com/ndownloader/files/34552102)

# Radical Acylalkylation of 1,3-Enynes to Access Allenic Ketones via *N*-Heterocyclic Carbene Organocatalysis

Yan-Qing Liu,<sup>†,‡,#</sup> Qing-Zhu Li,<sup>‡,#</sup> Xin-Xin Kou,<sup>‡</sup> Rong Zeng,<sup>‡</sup> Ting Qi,<sup>‡</sup> Xiang Zhang,<sup>‡</sup> Cheng Peng,<sup>†</sup> Bo Han,<sup>†\*</sup> and Jun-Long Li <sup>†,‡,\*</sup>

<sup>†</sup> *State Key Laboratory of Southwestern Chinese Medicine Resources, School of Pharmacy, Chengdu University of Traditional Chinese Medicine, Chengdu 611137, China.*

<sup>‡</sup> *Antibiotics Research and Re-evaluation Key Laboratory of Sichuan Province, Sichuan Industrial Institute of Antibiotics, School of Pharmacy, Chengdu University, Chengdu 610106, China.*

<sup>#</sup> *These authors contributed equally to this work*

## Supplementary Information

### Table of Contents

|                                                                                   |   |
|-----------------------------------------------------------------------------------|---|
| 1. Further Optimization Studies .....                                             | 2 |
| 2. Mechanism Studies.....                                                         | 3 |
| 3. Crystal Data and Structure Refinement for 4s.....                              | 6 |
| 4. Copies of <sup>1</sup> H, <sup>13</sup> C and <sup>19</sup> F NMR Spectra..... | 8 |

# 1. Further Optimization Studies

**Table S1.** Optimization of the 1,4-difunctionalization of 1,3-enynes **1a**<sup>a</sup>

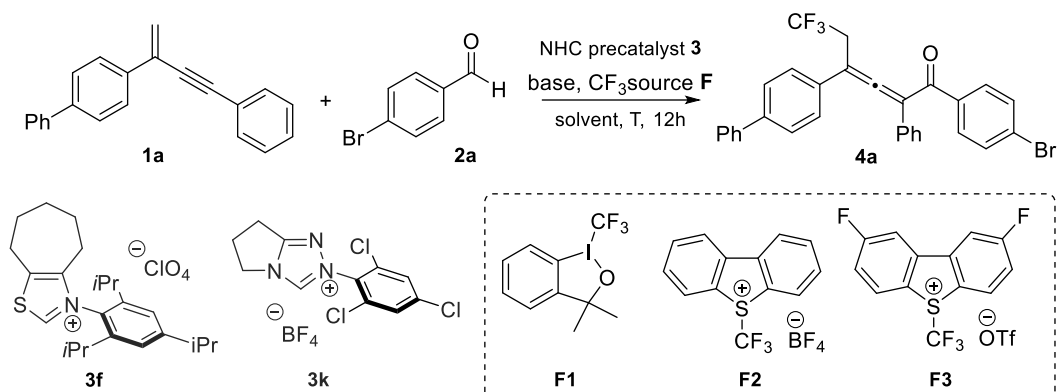

| entry | cat <b>3</b> | base                            | solvent                    | CF <sub>3</sub> source | Temp. (°C) | Yield (%) <sup>[b]</sup> |
|-------|--------------|---------------------------------|----------------------------|------------------------|------------|--------------------------|
| 1     | <b>3f</b>    | Cs <sub>2</sub> CO <sub>3</sub> | Actone                     | <b>F1</b>              | 60         | 84                       |
| 2     | <b>3f</b>    | Cs <sub>2</sub> CO <sub>3</sub> | <i>i</i> Pr <sub>2</sub> O | <b>F1</b>              | 60         | 71                       |
| 3     | <b>3f</b>    | DABCO                           | CF <sub>3</sub> Ph         | <b>F1</b>              | 60         | 38                       |
| 4     | <b>3k</b>    | Cs <sub>2</sub> CO <sub>3</sub> | CF <sub>3</sub> Ph         | <b>F1</b>              | 60         | 55                       |
| 5     | <b>3f</b>    | Cs <sub>2</sub> CO <sub>3</sub> | CF <sub>3</sub> Ph         | <b>F2</b>              | 60         | 49                       |
| 6     | <b>3f</b>    | Cs <sub>2</sub> CO <sub>3</sub> | CF <sub>3</sub> Ph         | <b>F3</b>              | 60         | 21                       |
| 7     | <b>3f</b>    | Cs <sub>2</sub> CO <sub>3</sub> | CF <sub>3</sub> Ph         | <b>F1</b>              | 20         | 77                       |
| 8     | <b>3f</b>    | Cs <sub>2</sub> CO <sub>3</sub> | CF <sub>3</sub> Ph         | <b>F1</b>              | 80         | 91                       |

<sup>a</sup> The reactions were carried out with **1a** (0.15 mmol), aldehyde **2a** (0.10 mmol), NHC **3** (0.02 mmol), base (0.04 mmol) and CF<sub>3</sub> source **F** (0.15 mmol) in solvent (1.0 mL) for 12h. <sup>b</sup> Isolated yield of **4a**.

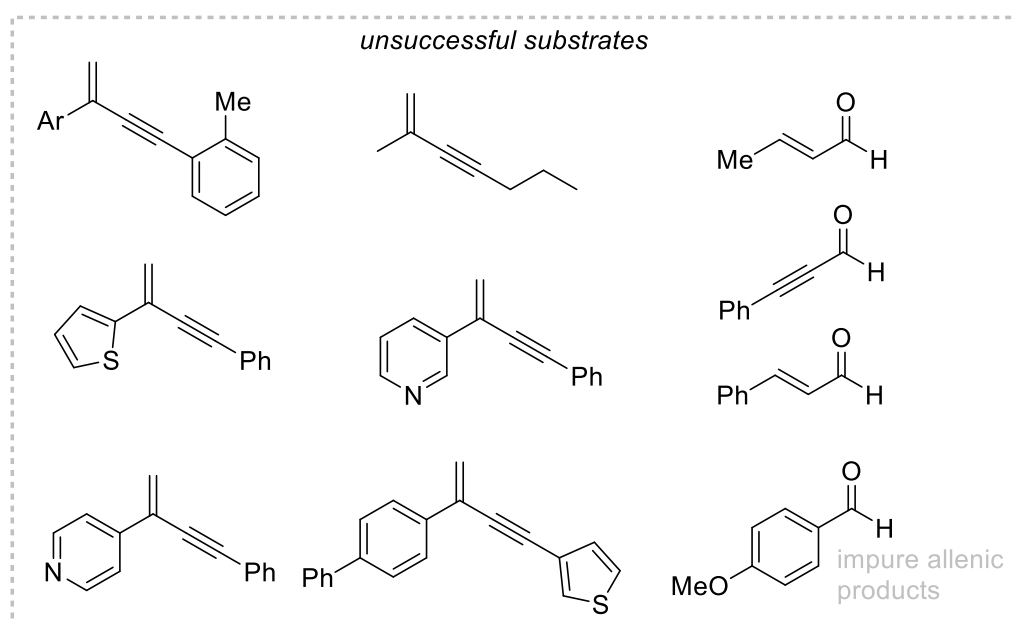

**Schemem S1.** unsuccessful substrates

## 2. Mechanism Studies

### 2.1 Intermolecular Cation-Trapping Experiments

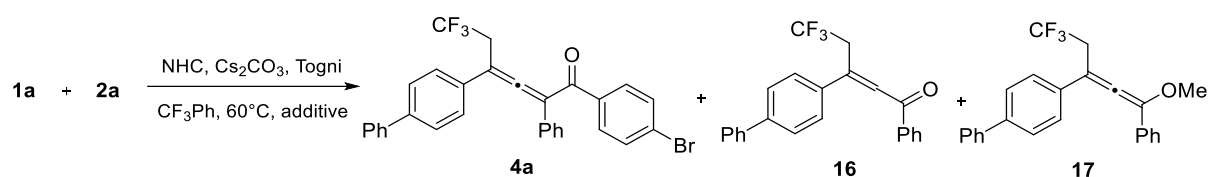

| entry | additive         | equiv | 4a  | 16 | 17 |
|-------|------------------|-------|-----|----|----|
| 1     | none             | 0     | 99% | /  | /  |
| 2     | H <sub>2</sub> O | 5.0   | 75% | 0  | /  |
| 3     | H <sub>2</sub> O | 1.0   | 73% | 0  | /  |
| 4     | H <sub>2</sub> O | 0.5   | 84% | 0  | /  |
| 5     | MeOH             | 5.0   | 54% | /  | 0  |
| 6     | MeOH             | 1.0   | 56% | /  | 0  |
| 7     | MeOH             | 0.5   | 75% | /  | 0  |

To a flame-dried Schlenk tube were added NHC **3f** (0.02 mmol), 1,3-enynes **1a** (0.15 mmol), Togni I reagent **F1** (0.15 mmol) and Cs<sub>2</sub>CO<sub>3</sub> (0.04 mmol), after which the tube was evacuated and back-filled with argon three times. Subsequently, under the protection of Ar, a solution of the corresponding aldehydes **2a** (0.10 mmol) and the additive in anhydrous CF<sub>3</sub>Ph (1.0 mL) was added via syringe. The resulting suspension was heated to 60 by oil bath °C for 12 h, after which the reaction mixture was concentrated under reduced pressure and the resulting crude material was purified by column chromatography on silica gel to afford the corresponding products **4a**. No cation-trapping products **16** or **17** was observed by HRMS analysis.

### 2.2 Probe for Putative Intermediates

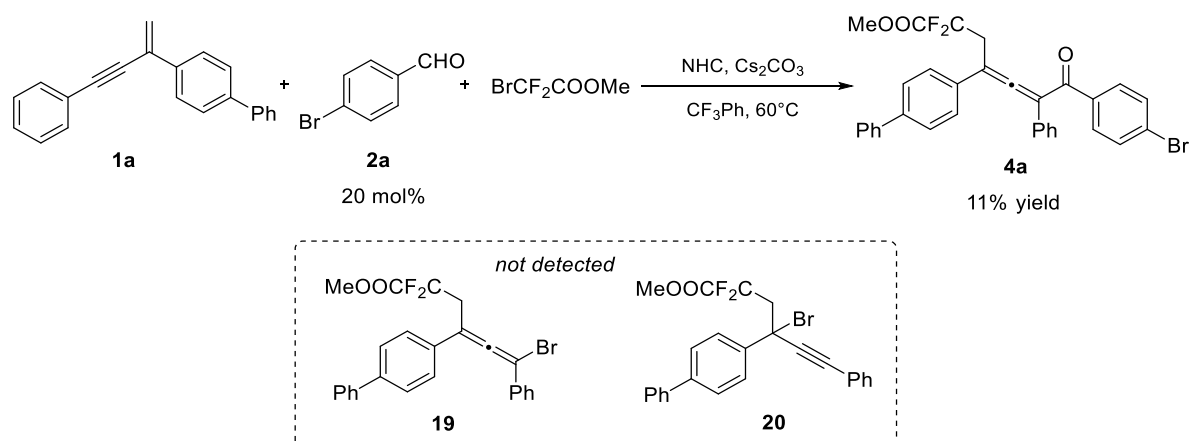

To a flame-dried Schlenk tube were added NHC **3f** (0.02 mmol), 1,3-enynes **1a** (0.15 mmol) and Cs<sub>2</sub>CO<sub>3</sub> (0.04 mmol), after which the tube was evacuated and back-filled with argon three times. Subsequently, under the protection of Ar, a solution of the corresponding aldehydes **2a** (0.02 mmol) and BrCF<sub>2</sub>COOMe (0.15 mmol) in anhydrous CF<sub>3</sub>Ph (1.0 mL) was added via syringe. The resulting suspension was heated to 60 °C by oil bath for 12 h, after the reaction mixture was concentrated under reduced pressure and the resulting crude material was purified by column chromatography on silica gel to afford the corresponding products **4a** with 11% yield. No product **19** or **20** was observed by HRMS analysis.

## 2.2 Ring-closing Experiment

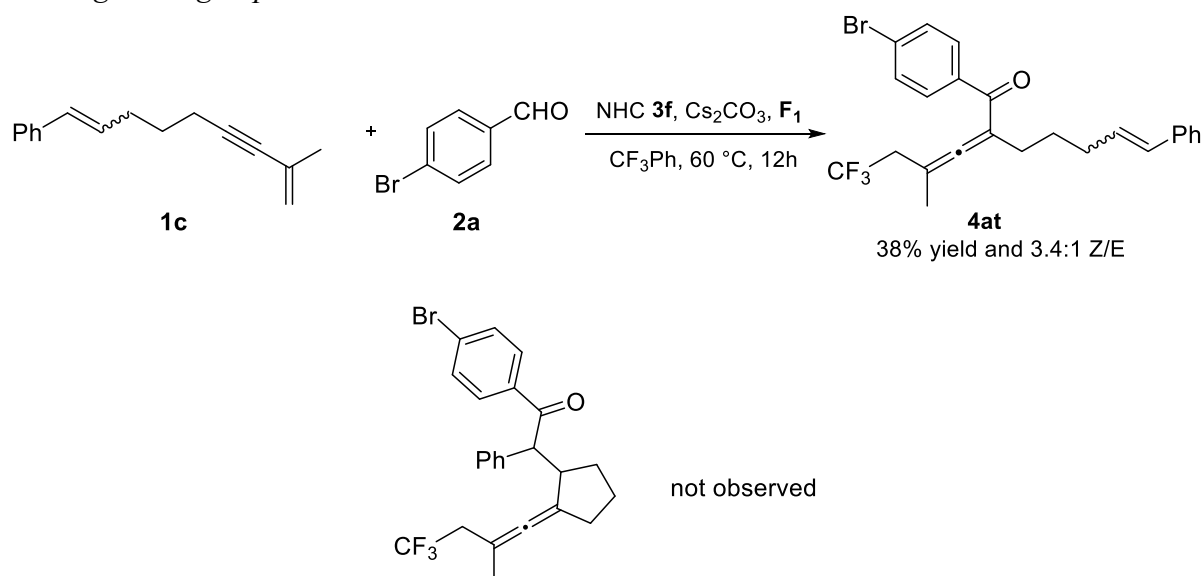

To a flame-dried Schlenk tube were added NHC **3f** (0.02 mmol), 1,3-enynes **1c** (0.15 mmol), Togni **I** reagent **F1** (0.15 mmol) and Cs<sub>2</sub>CO<sub>3</sub> (0.04 mmol), and the tube was evacuated and back-filled with argon three times. Subsequently, under the protection of Ar, a solution of the corresponding aldehydes **2a** (0.10 mmol) in anhydrous CF<sub>3</sub>Ph (1.0 mL) was added via syringe. The resulting suspension was heated to 60 °C by oil bath for 12 h, after the reaction mixture was concentrated under reduced pressure and the resulting crude material was purified by column chromatography to afford the corresponding products **4at** in 38% yield as a mixture of cis and trans isomers. In this reaction, the radical addition product was not observed.

## 7.6 Ring-opening Experiment

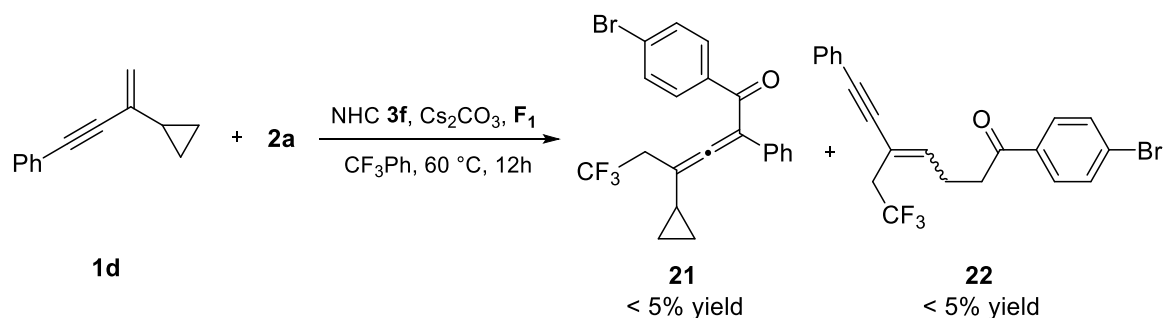



To a flame-dried Schlenk tube were added NHC **3f** (0.02 mmol), 1,3-enynes **1d** (0.15 mmol), Togni I reagent **F1** (0.15 mmol) and Cs<sub>2</sub>CO<sub>3</sub> (0.04 mmol), after which the tube was evacuated and back-filled with argon three times. Subsequently, under the protection of Ar, a solution of the corresponding aldehydes **2a** (0.10 mmol) in anhydrous CF<sub>3</sub>Ph (1.0 mL) was added via syringe. The resulting suspension was heated to 60 °C by oil bath for 12 h, and no product **21** or **22** was observed.

### 3. Crystal Data and Structure Refinement for 4s

To a tube containing **4s** (20 mg) was added a 40:1 mixture of petroleum ether and ethyl acetate (about 4 mL). The tube was kept aside for 6 days at room temperature to obtain crystals. The crystals were subjected for single crystal XRD to determine the structure of **4s**. The data were collected by a Bruker APEX-II CCD equipped with a Mo radiation source ( $K\alpha = 0.71073 \text{ \AA}$ ) at 301.0 K. CCDC 2108115 (**4s**) contains the supplementary crystallographic data for this paper.

*Crystal Data (at 50% probability level)*

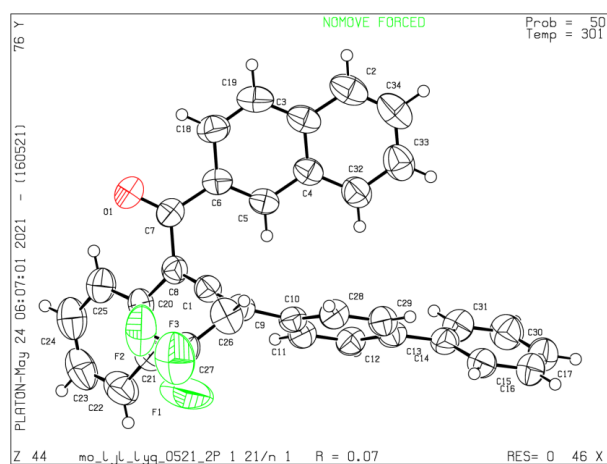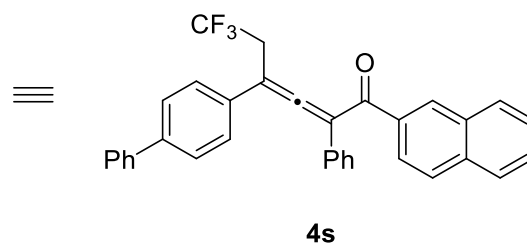

|                                  |                                                  |
|----------------------------------|--------------------------------------------------|
| Identification code              | <b>4s</b>                                        |
| Empirical formula                | C <sub>34</sub> H <sub>22</sub> F <sub>3</sub> O |
| Formula weight                   | 503.51                                           |
| Temperature/K                    | 301.0                                            |
| Crystal system                   | monoclinic                                       |
| Space group                      | P2 <sub>1</sub> /n                               |
| a/Å                              | 9.963(4)                                         |
| b/Å                              | 27.249(10)                                       |
| c/Å                              | 10.129(4)                                        |
| $\alpha /^\circ$                 | 90                                               |
| $\beta /^\circ$                  | 109.647(12)                                      |
| $\gamma /^\circ$                 | 90                                               |
| Volume/Å <sup>3</sup>            | 2589.6(17)                                       |
| Z                                | 4                                                |
| $\rho_{\text{calc}}/\text{cm}^3$ | 1.291                                            |
| $\mu / \text{mm}^{-1}$           | 0.091                                            |
| F(000)                           | 1044.0                                           |
| Crystal size/mm <sup>3</sup>     | 0.35 × 0.09 × 0.07                               |
| Radiation                        | MoK $\alpha$ ( $\lambda = 0.71073$ )             |

|                                                  |                                                               |
|--------------------------------------------------|---------------------------------------------------------------|
| 2 $\Theta$ range for data collection/ $^{\circ}$ | 4.524 to 55.124                                               |
| Index ranges                                     | $-12 \leq h \leq 12, -35 \leq k \leq 35, -13 \leq l \leq 13$  |
| Reflections collected                            | 32152                                                         |
| Independent reflections                          | 5909 [ $R_{\text{int}} = 0.0867, R_{\text{sigma}} = 0.0575$ ] |
| Data/restraints/parameters                       | 5909/7/344                                                    |
| Goodness-of-fit on $F^2$                         | 1.021                                                         |
| Final R indexes [ $I \geq 2\sigma(I)$ ]          | $R_1 = 0.0662, wR_2 = 0.1573$                                 |
| Final R indexes [all data]                       | $R_1 = 0.1373, wR_2 = 0.2000$                                 |
| Largest diff. peak/hole / $e \text{ \AA}^{-3}$   | 0.44/-0.30                                                    |

## 4. Copies of $^1\text{H}$ , $^{13}\text{C}$ and $^{19}\text{F}$ NMR Spectra

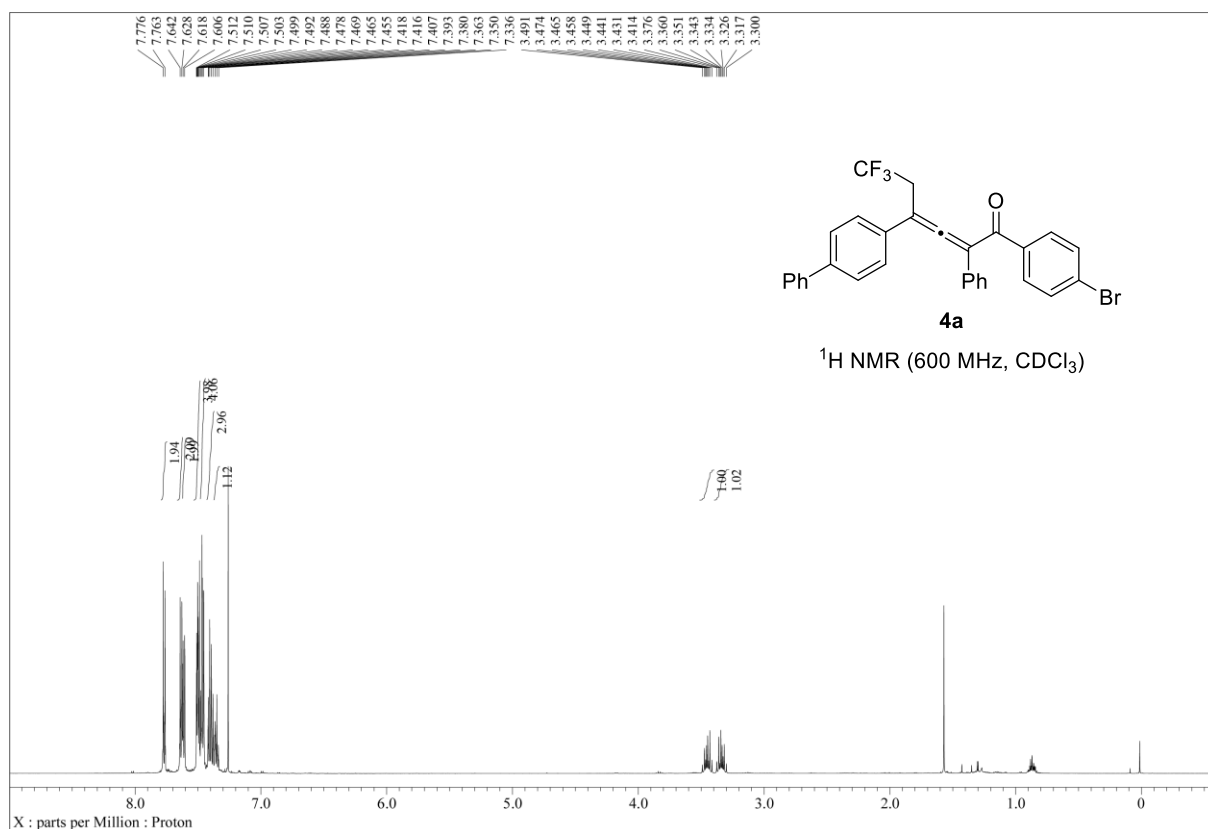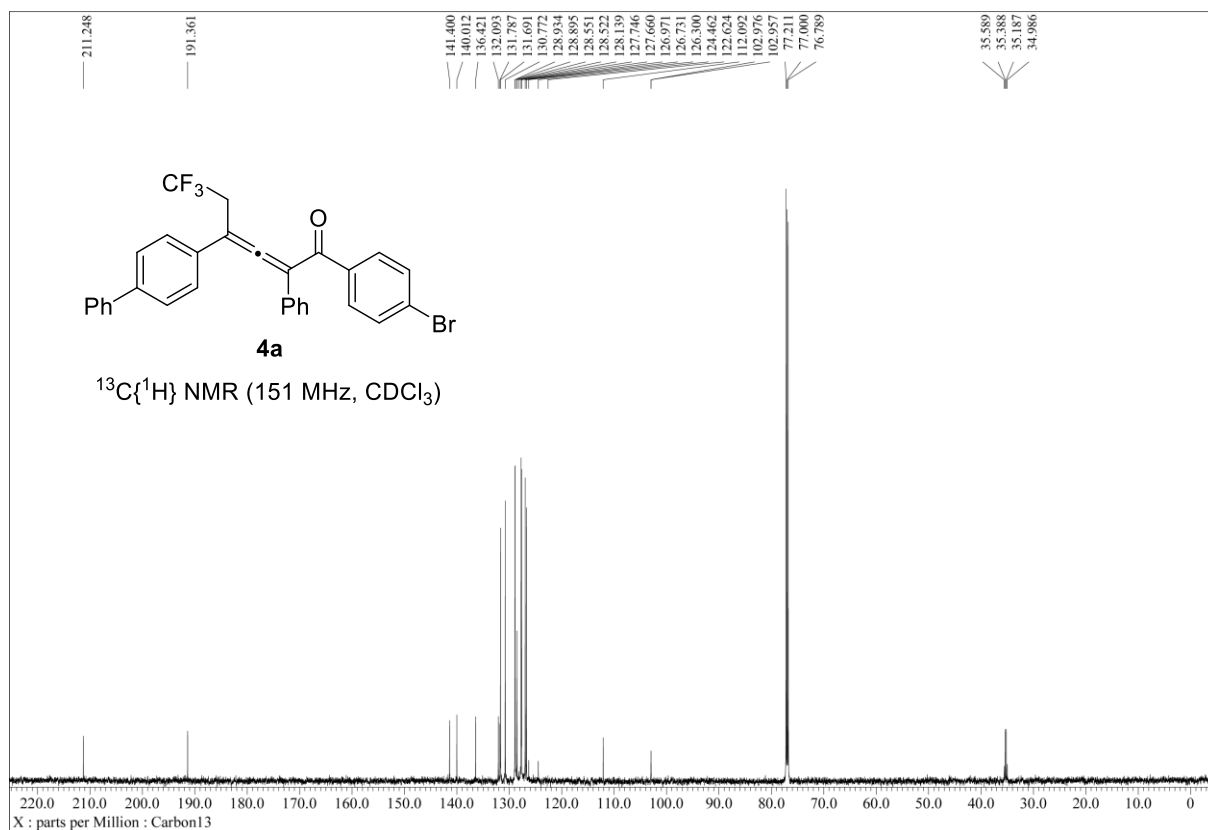

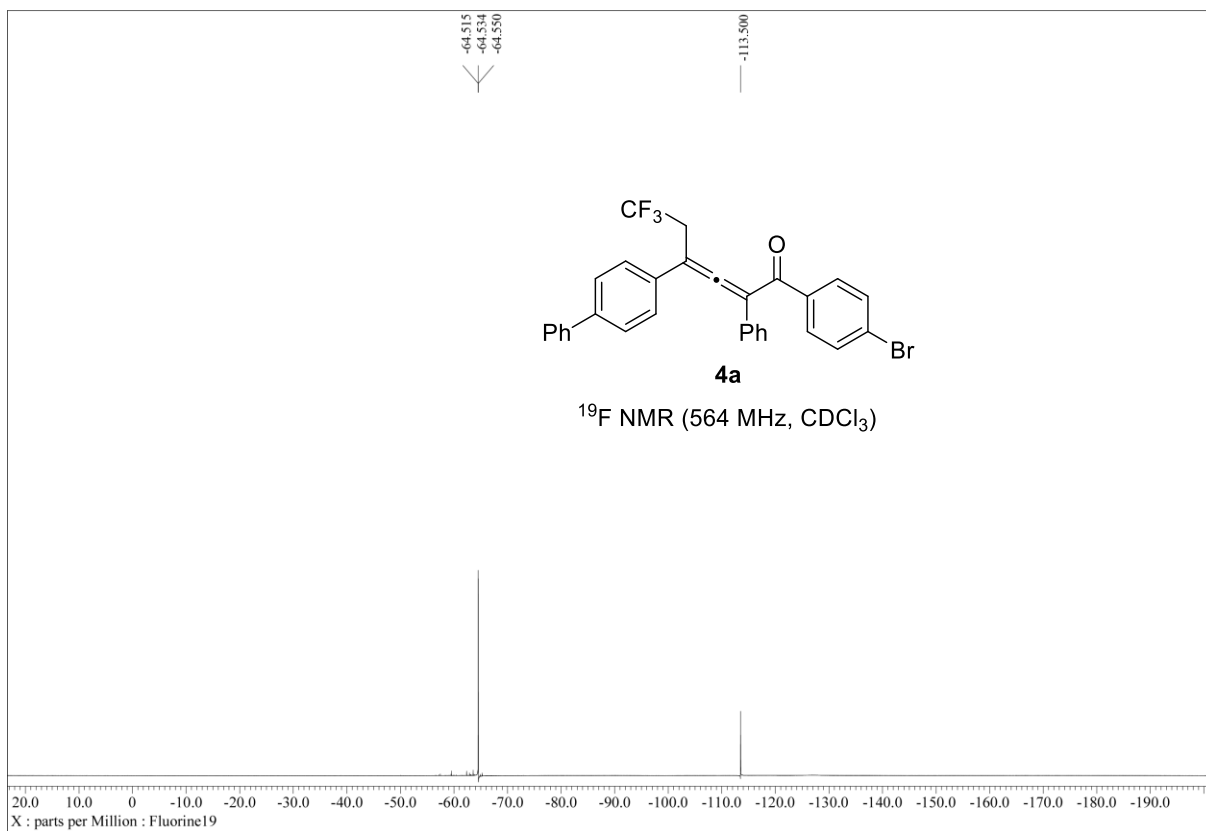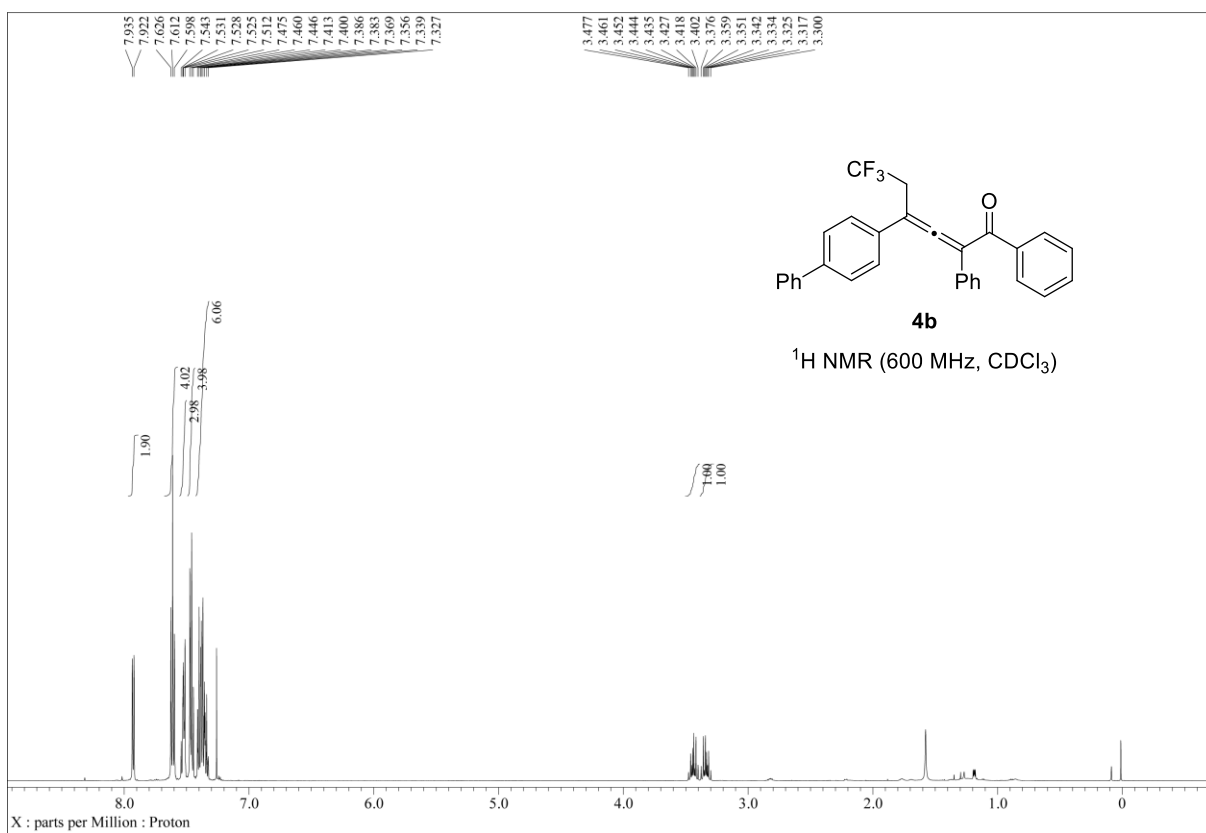

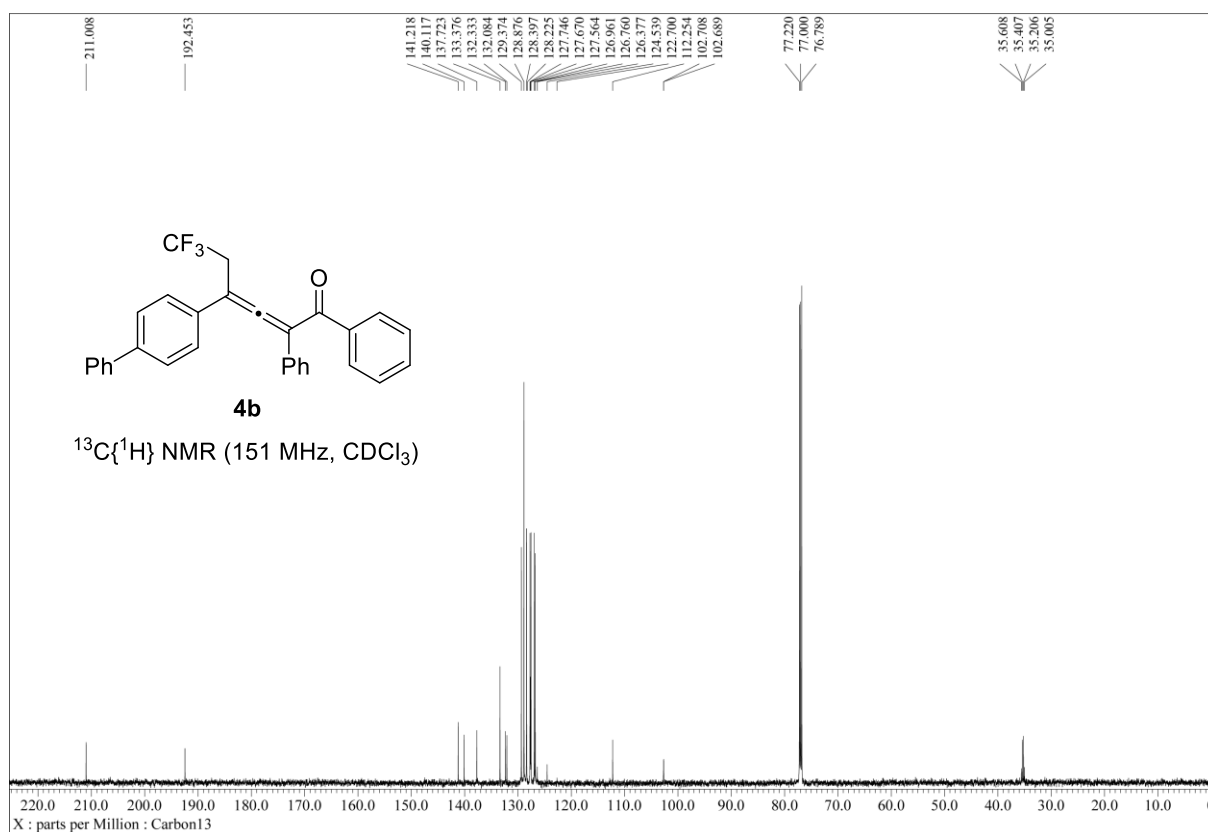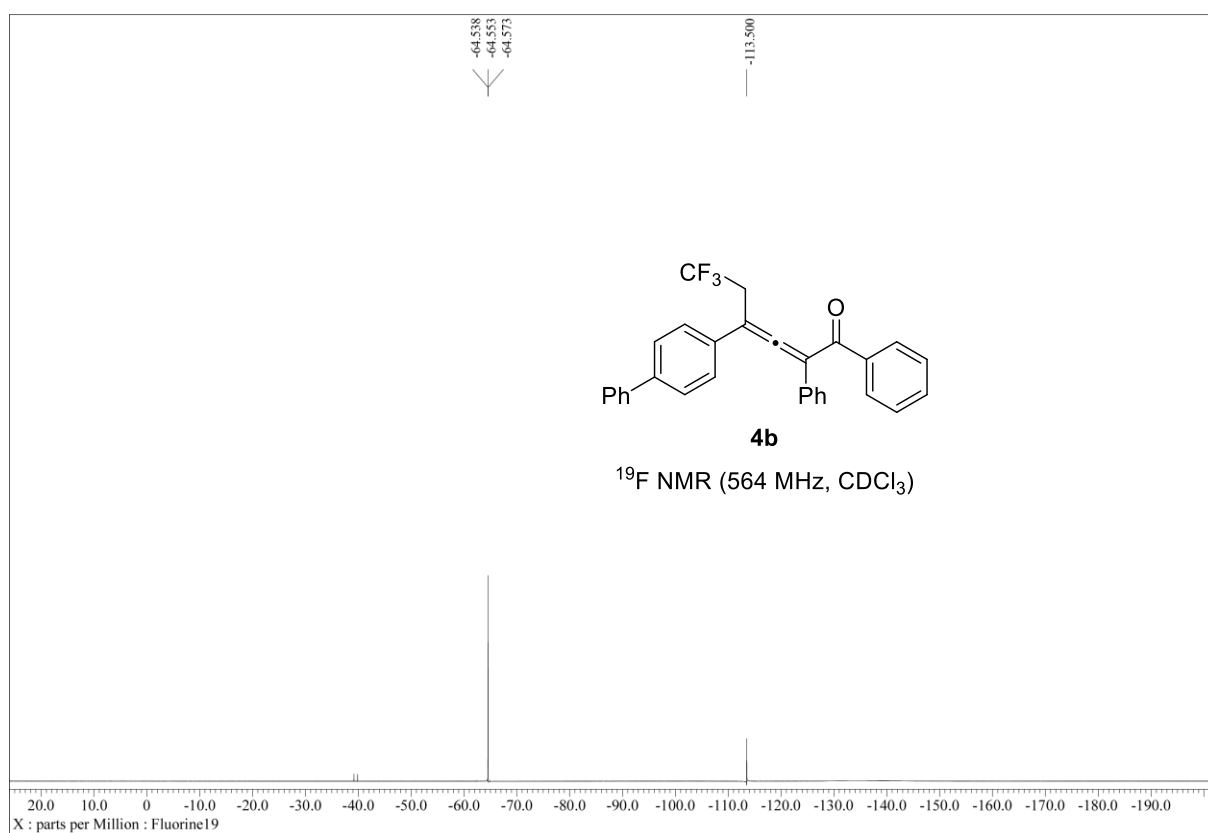

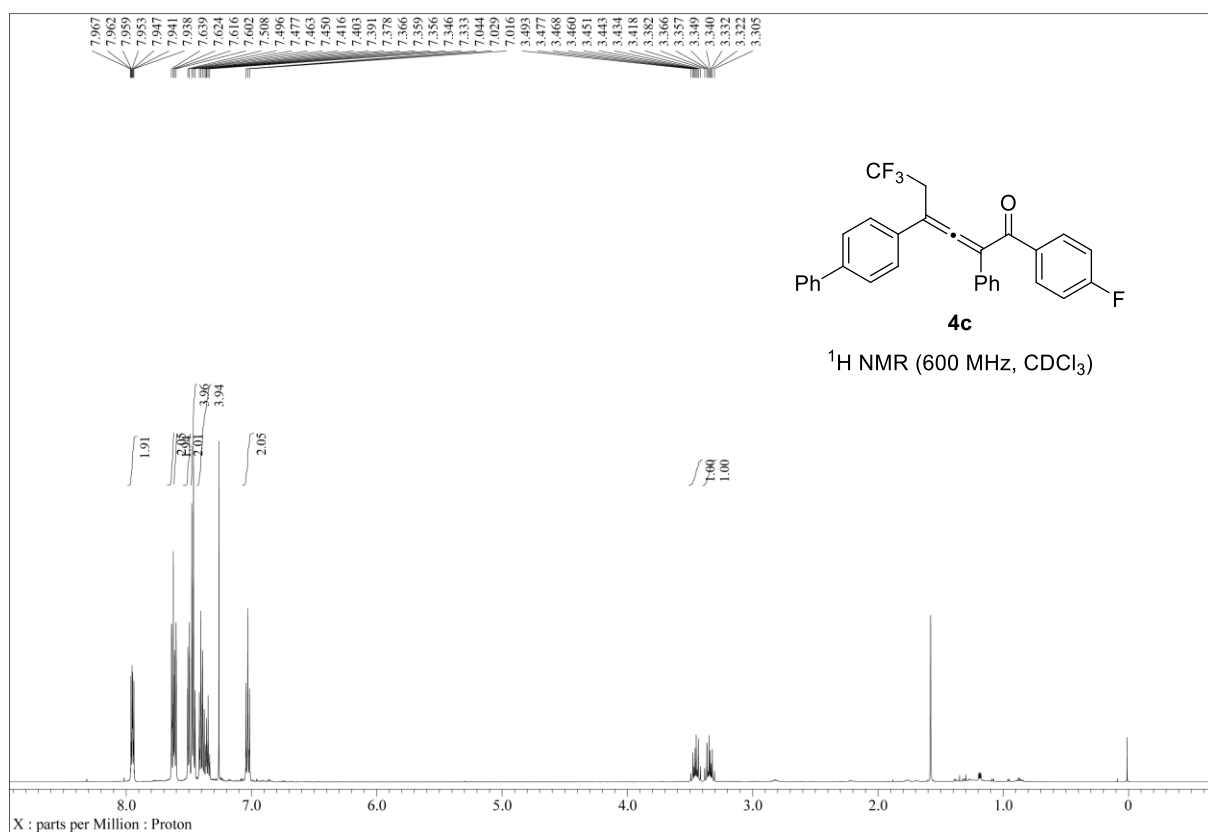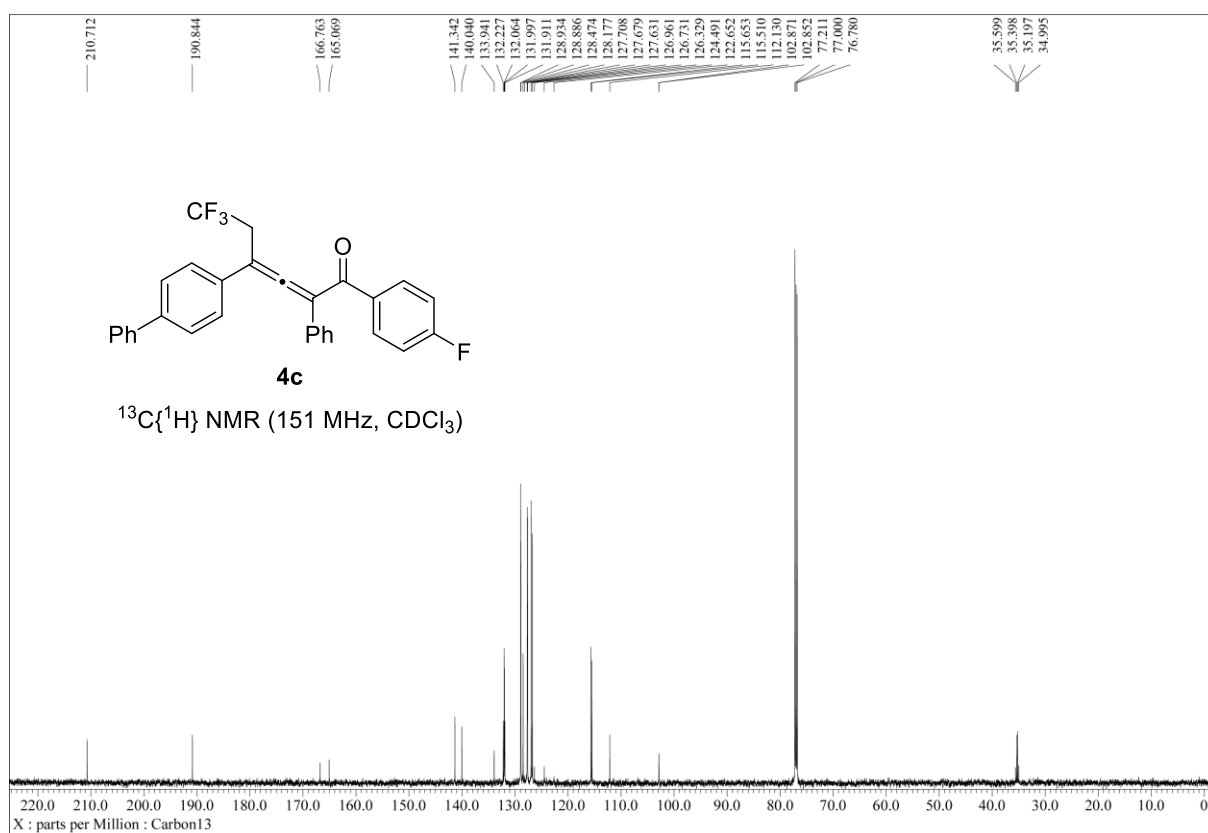

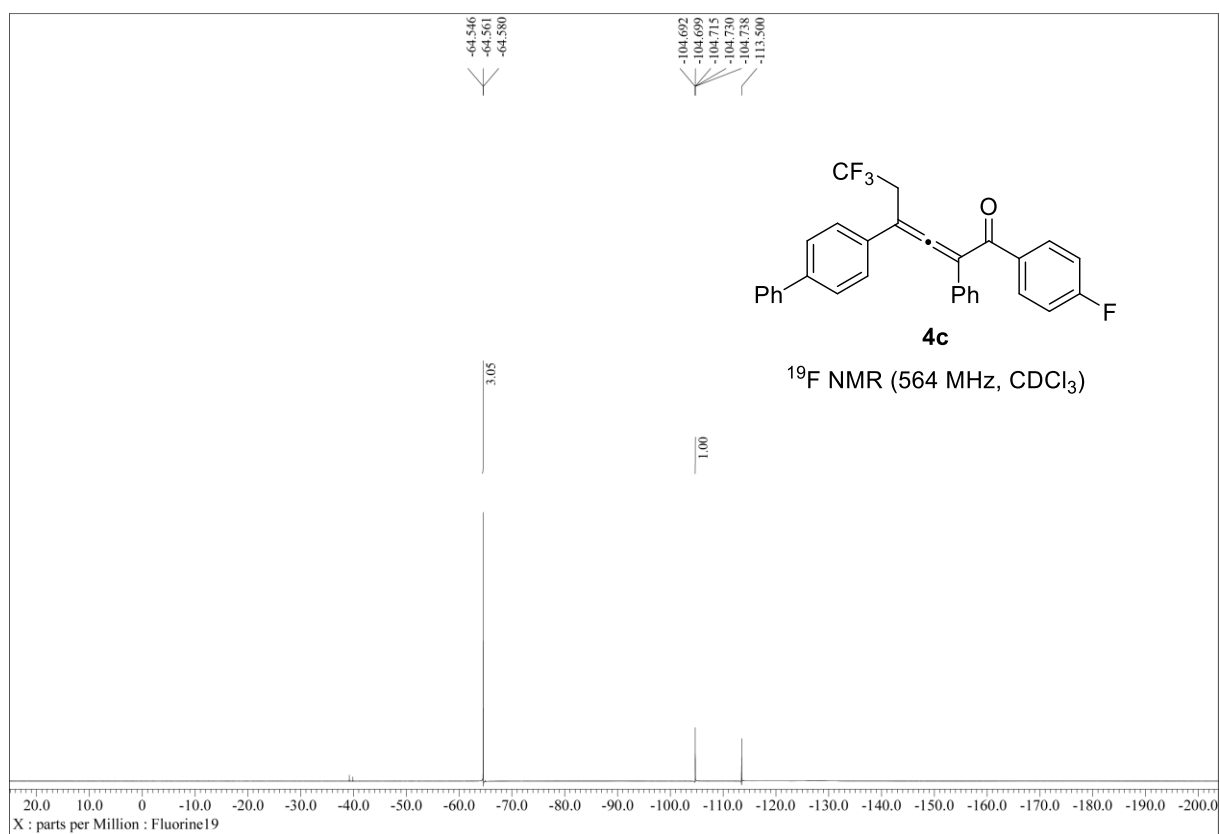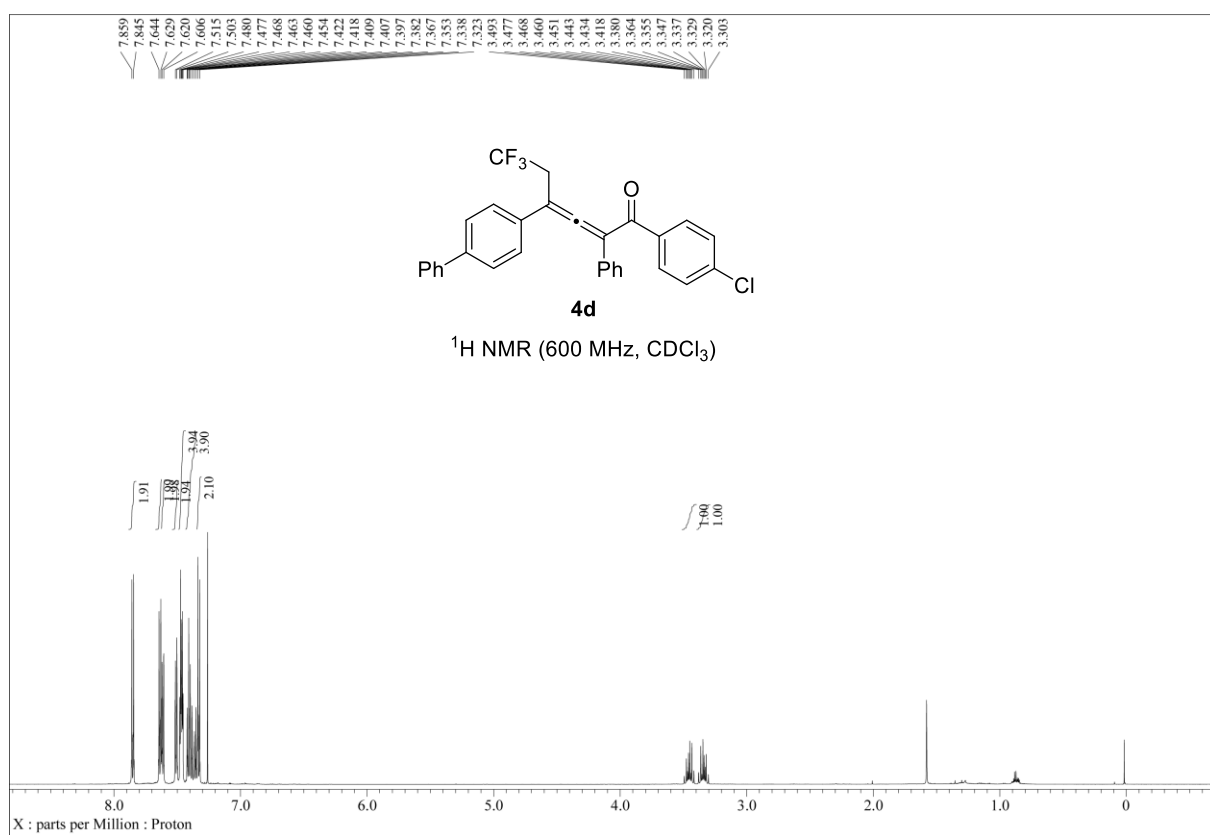



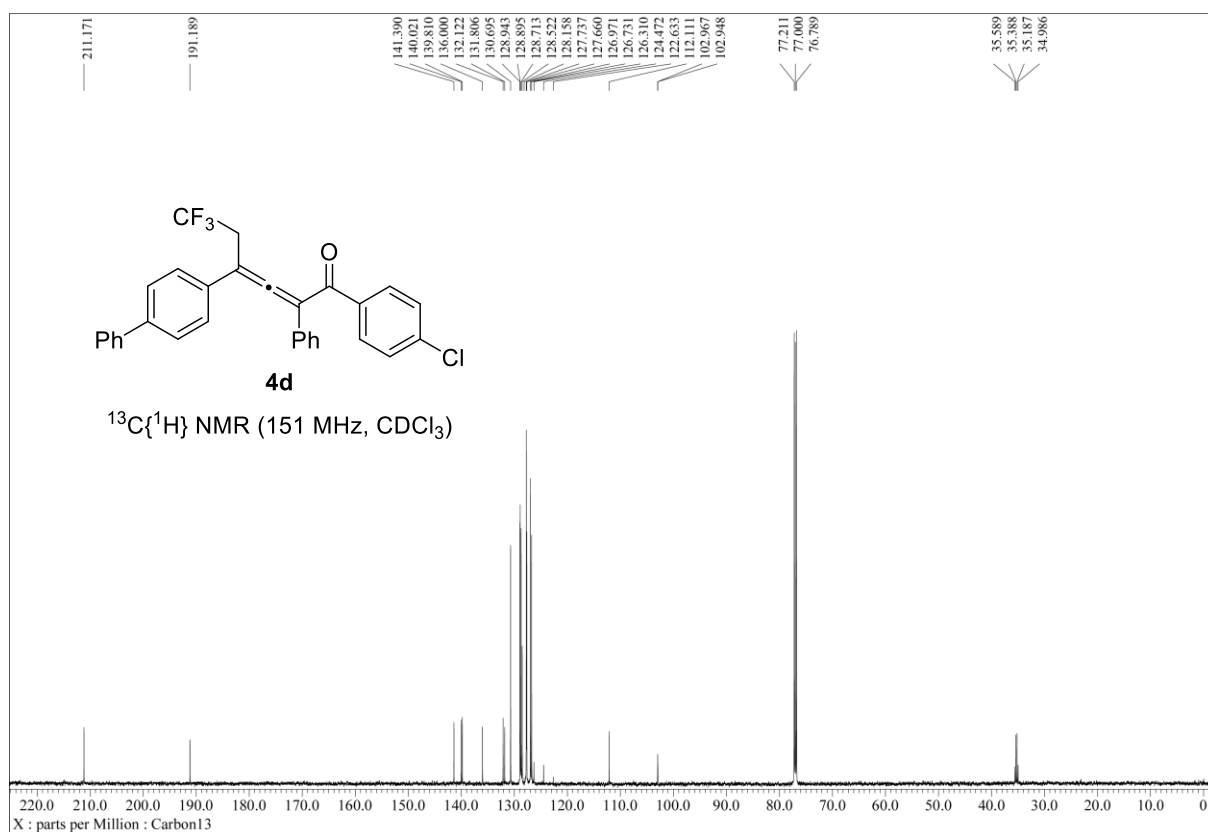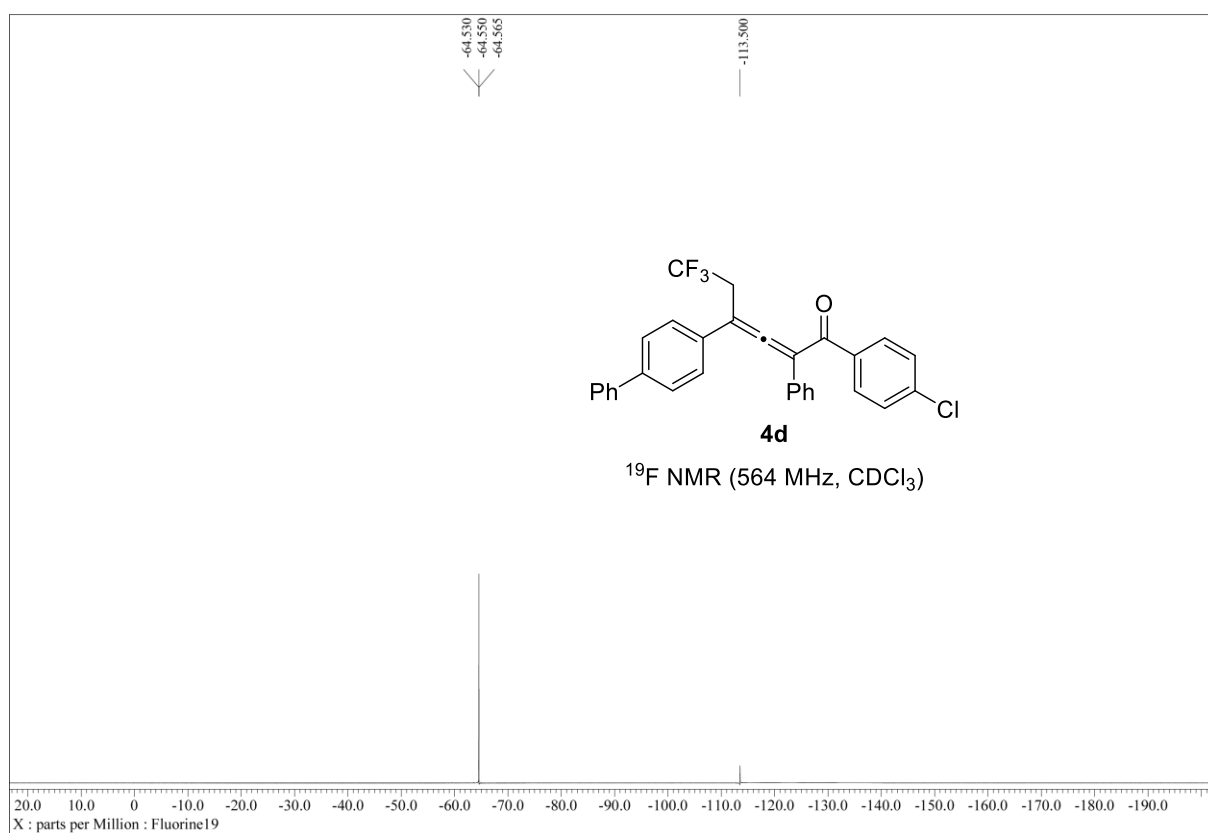

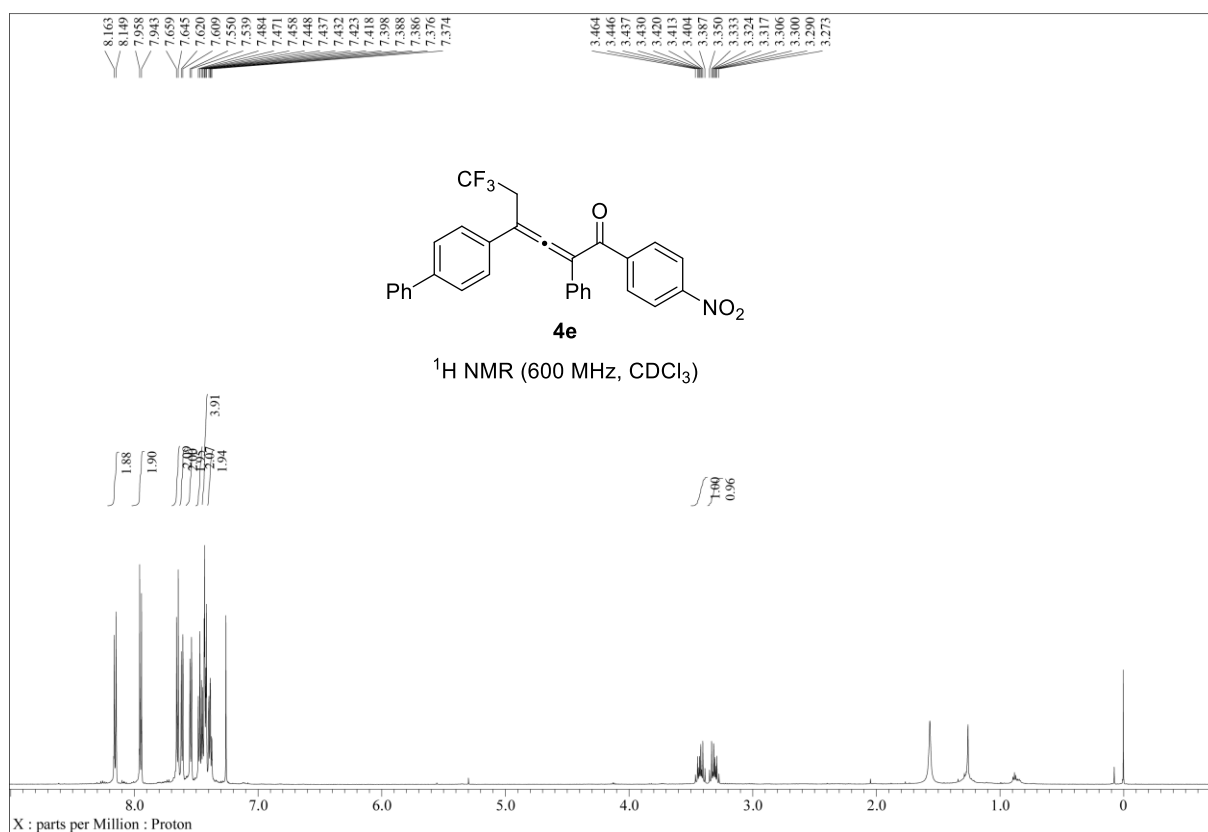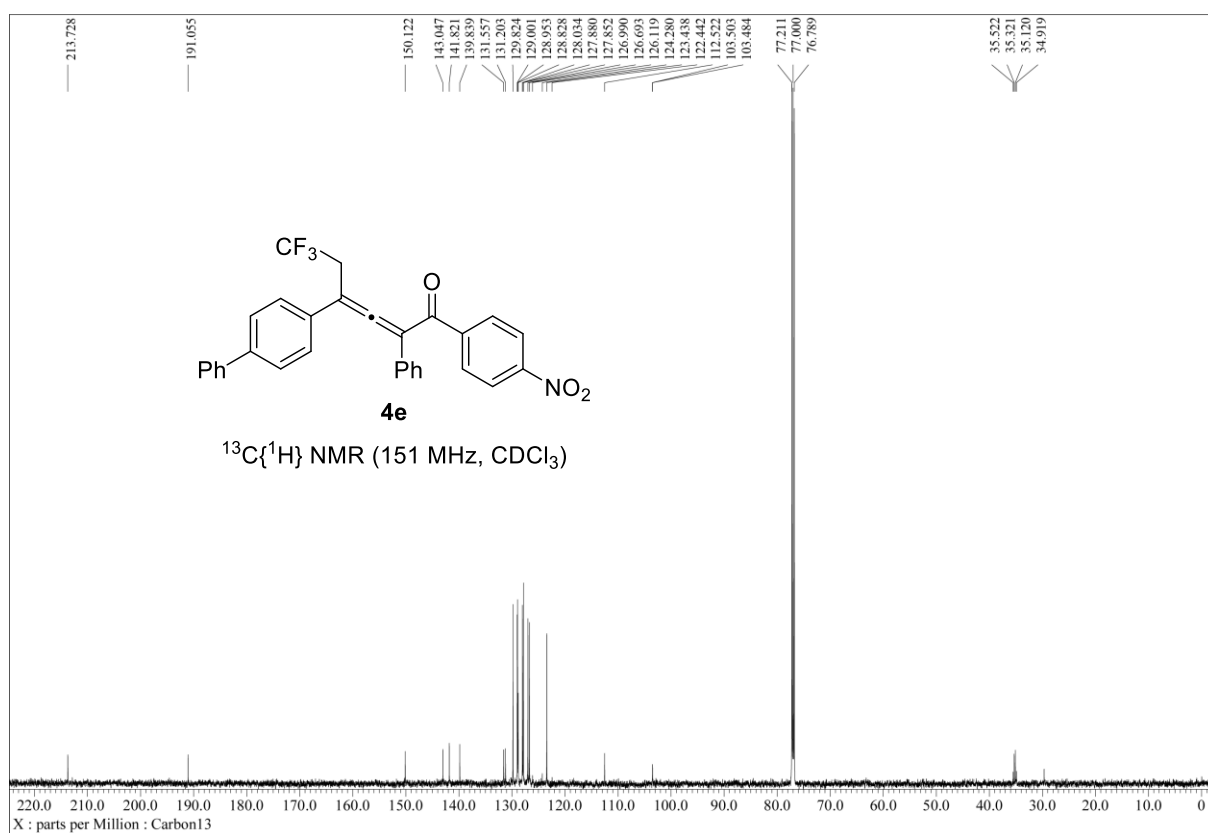

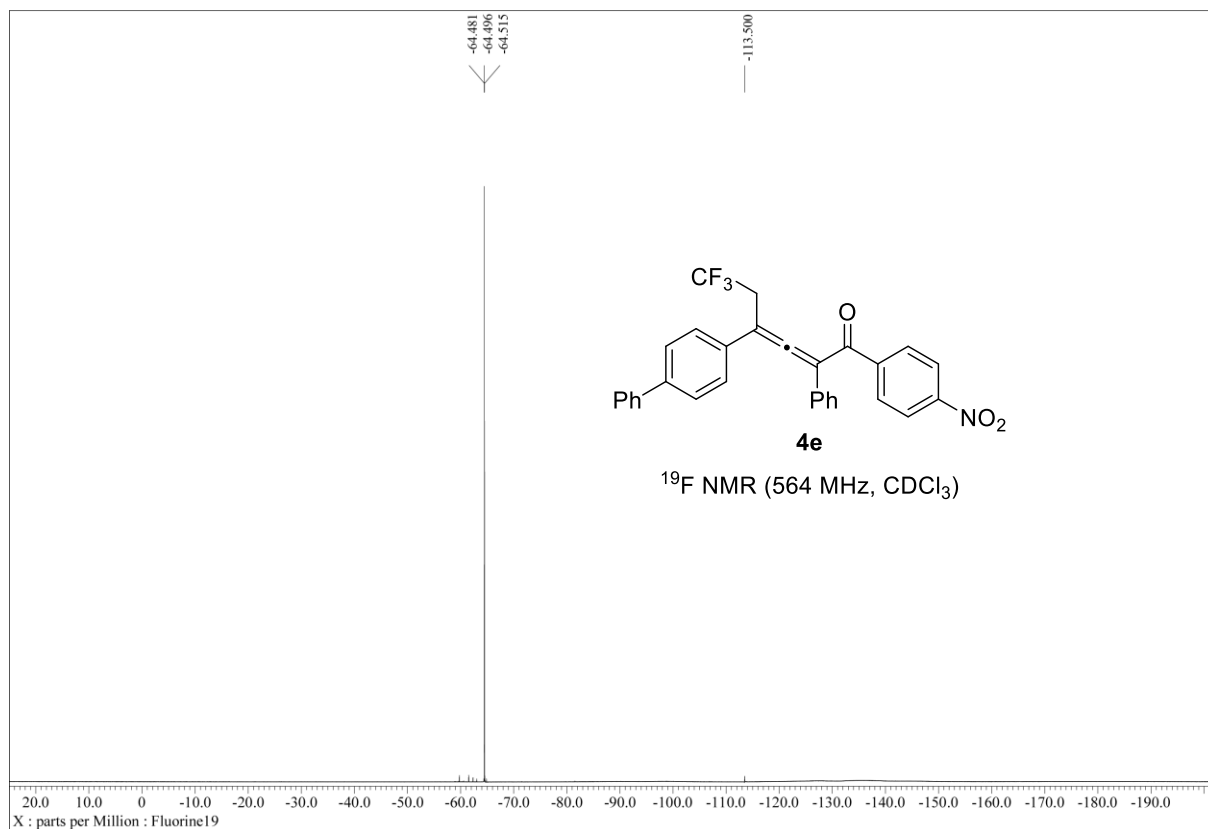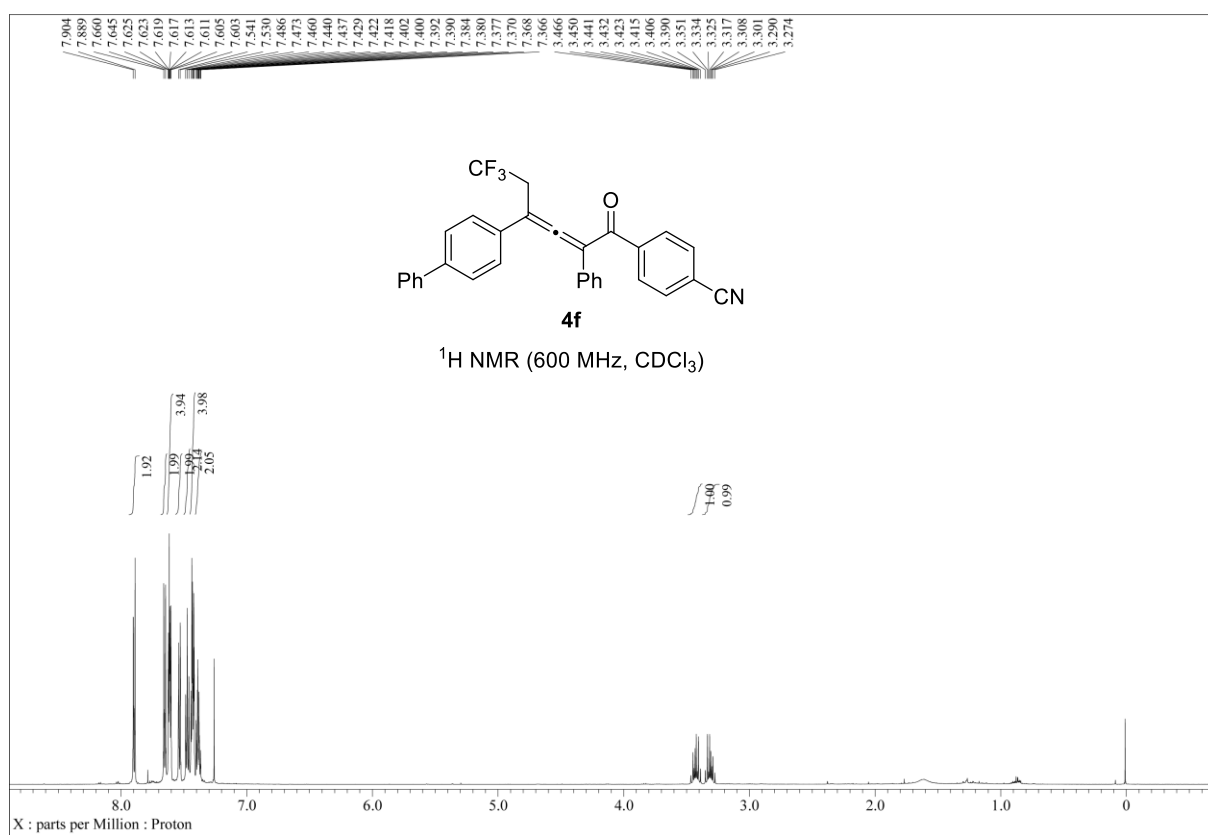

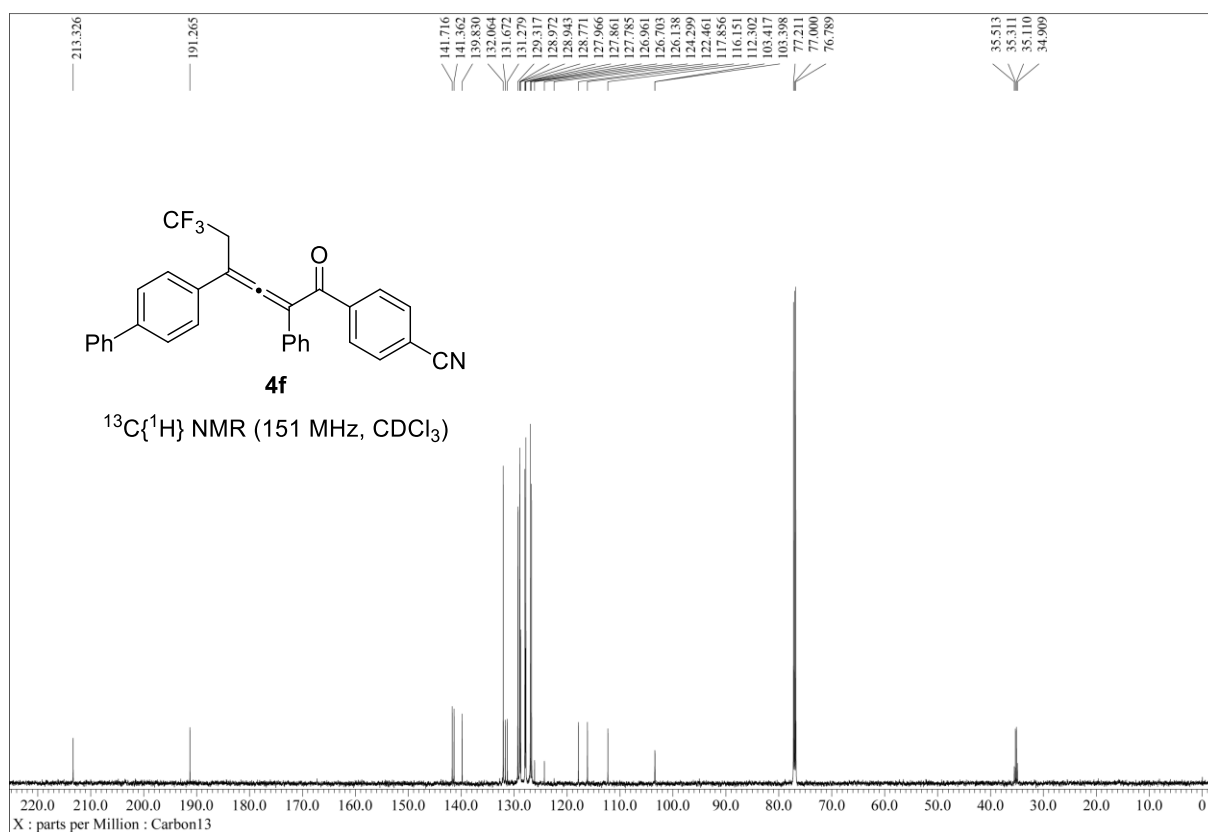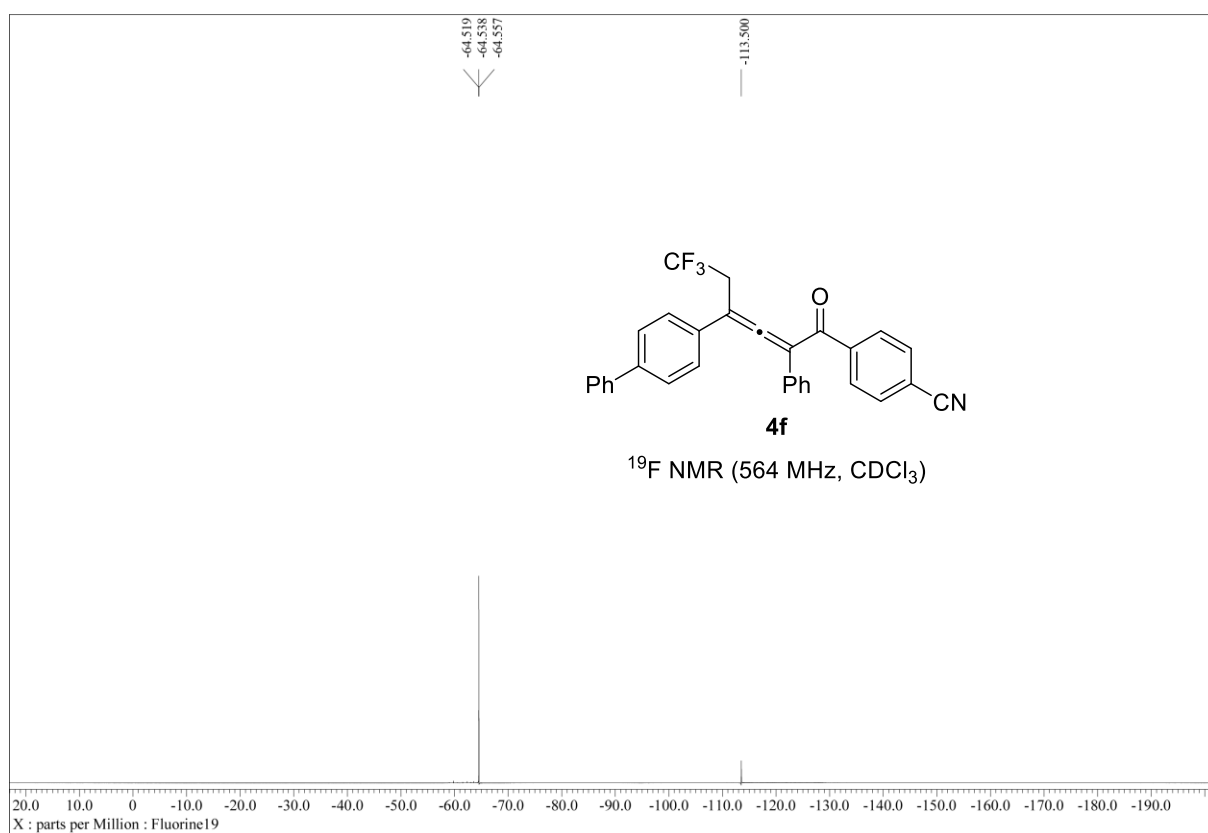

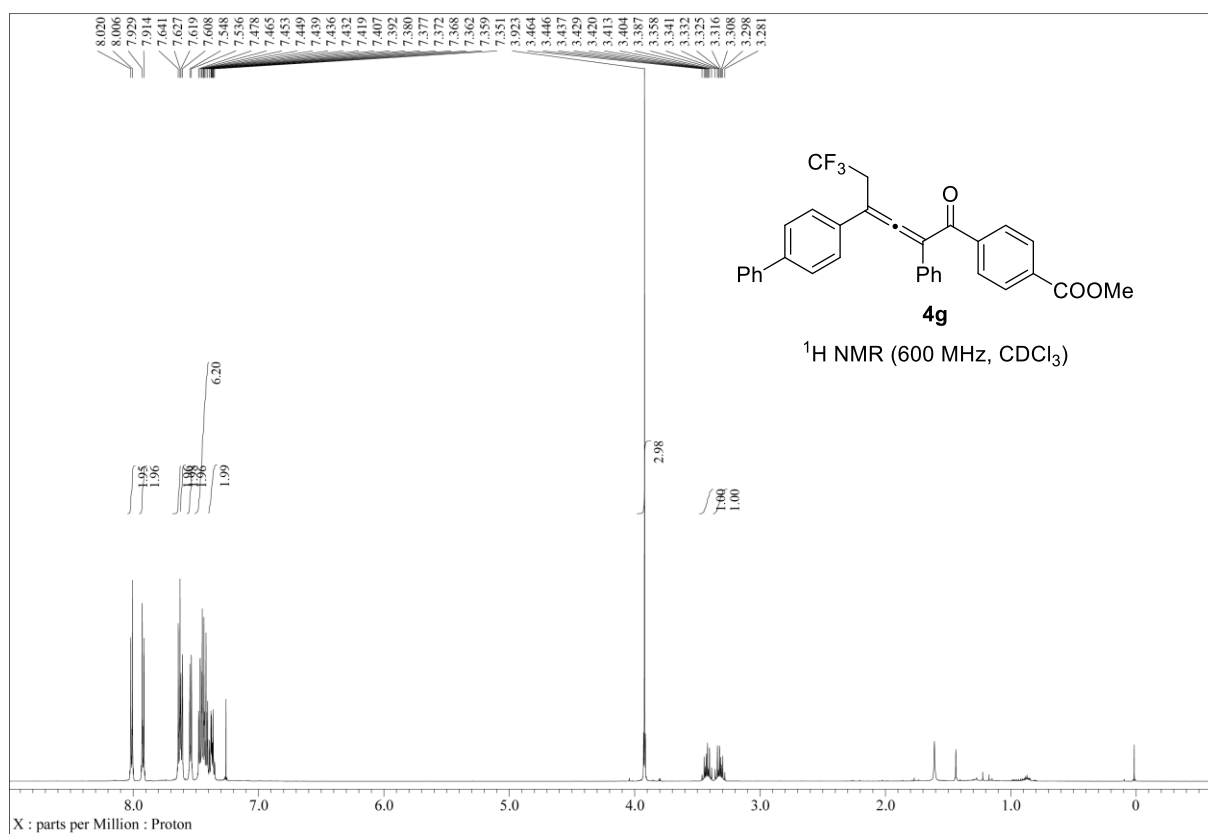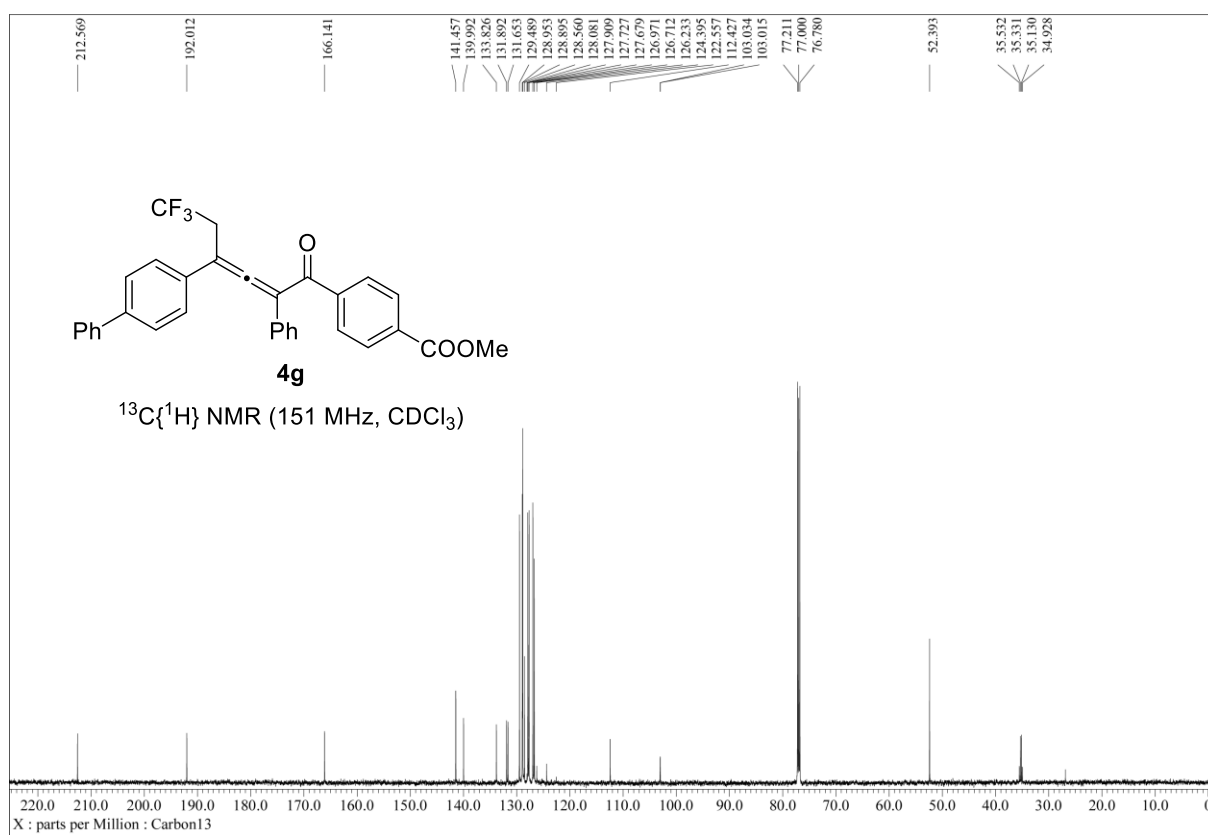

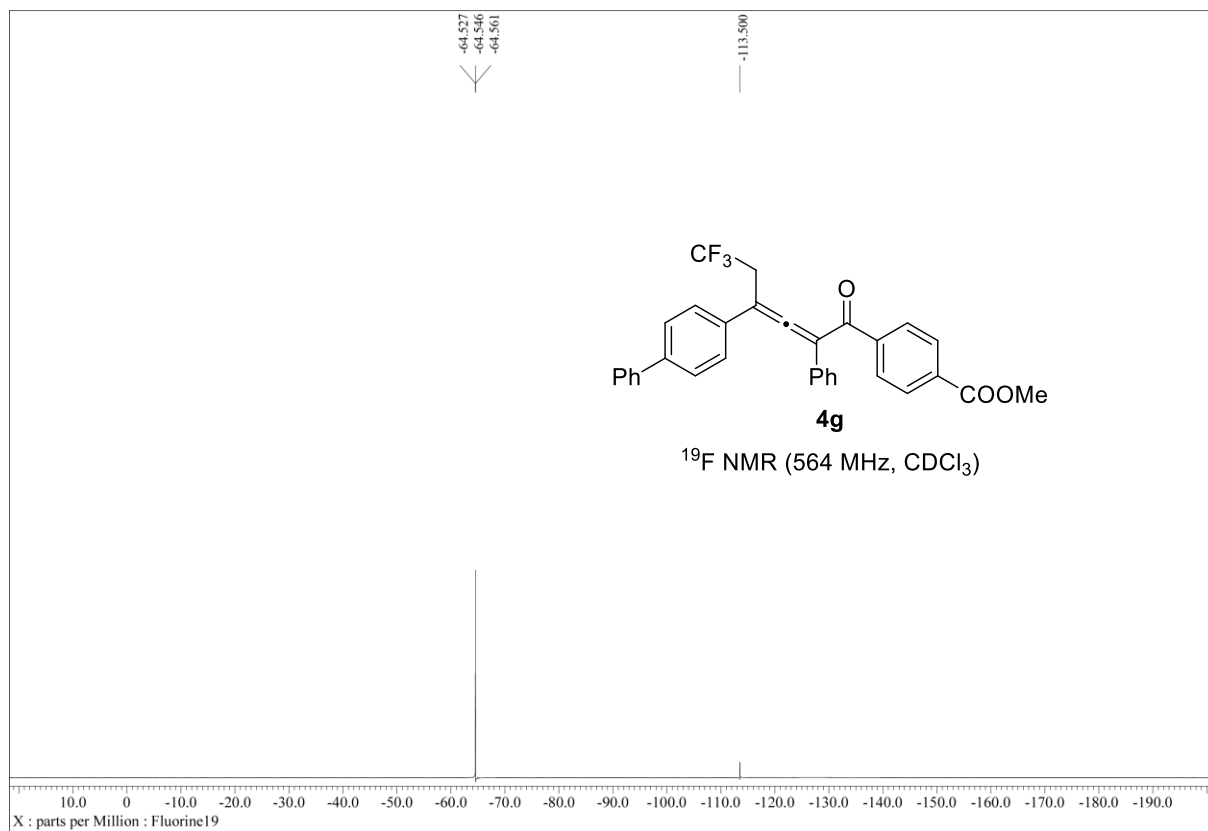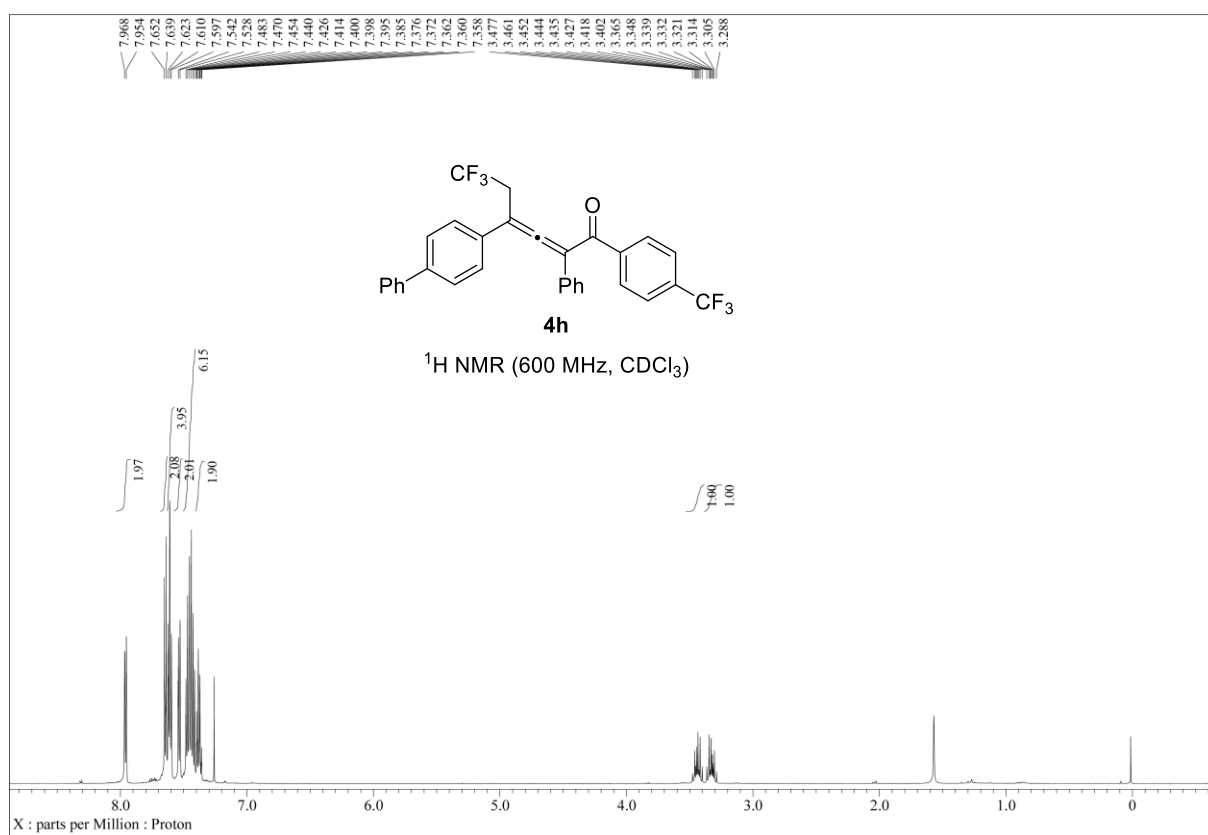

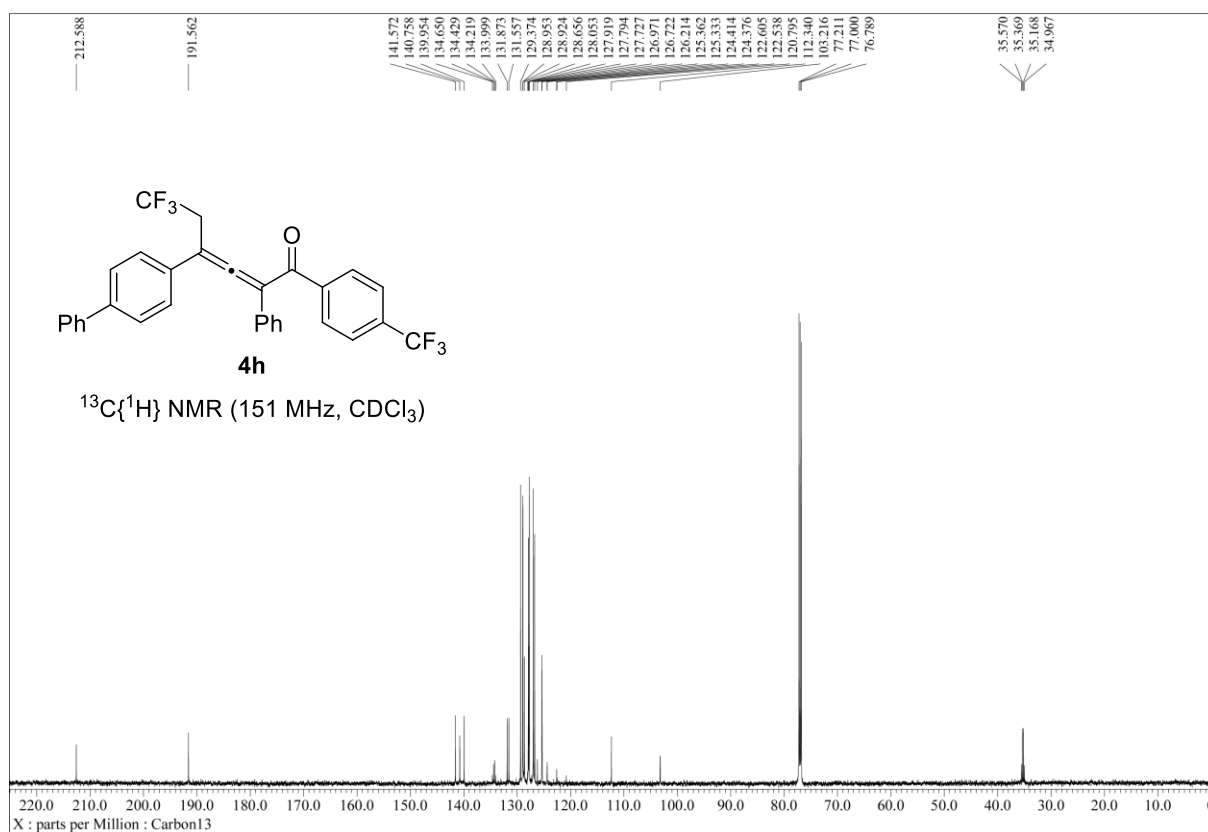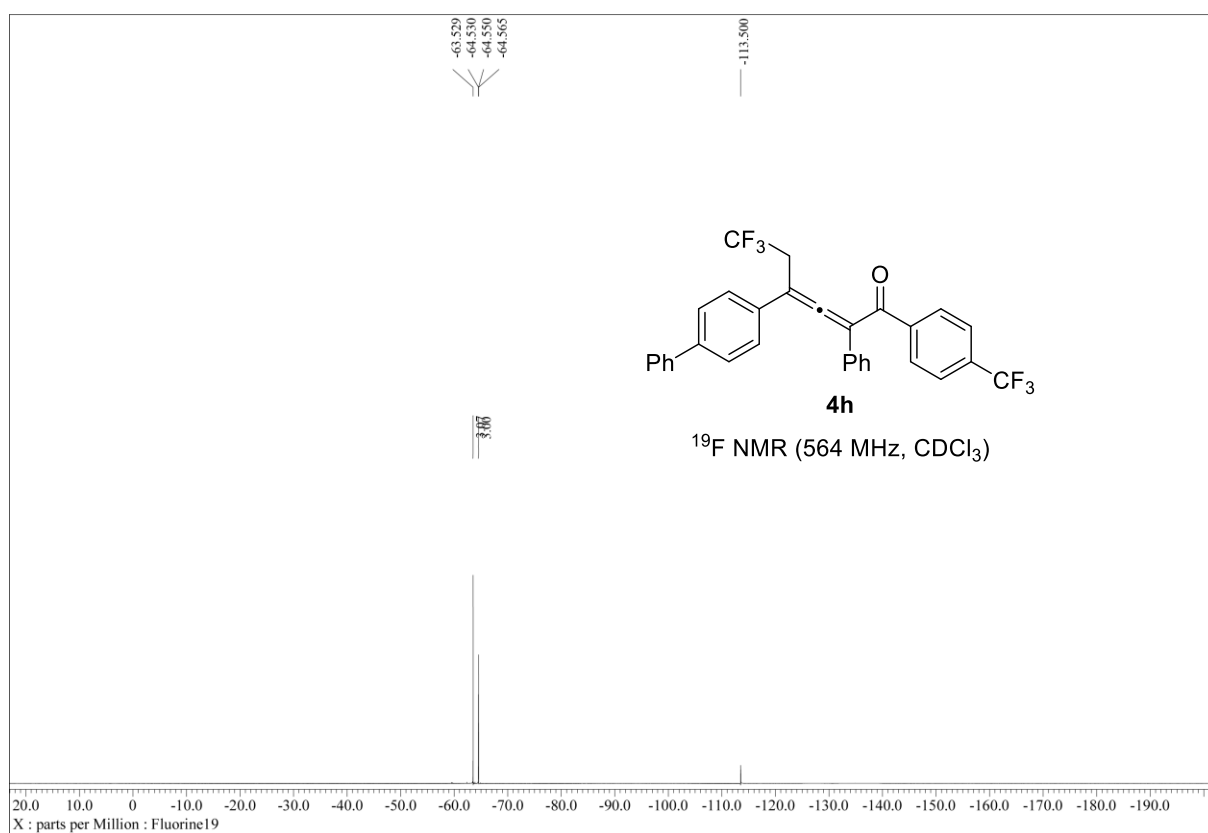

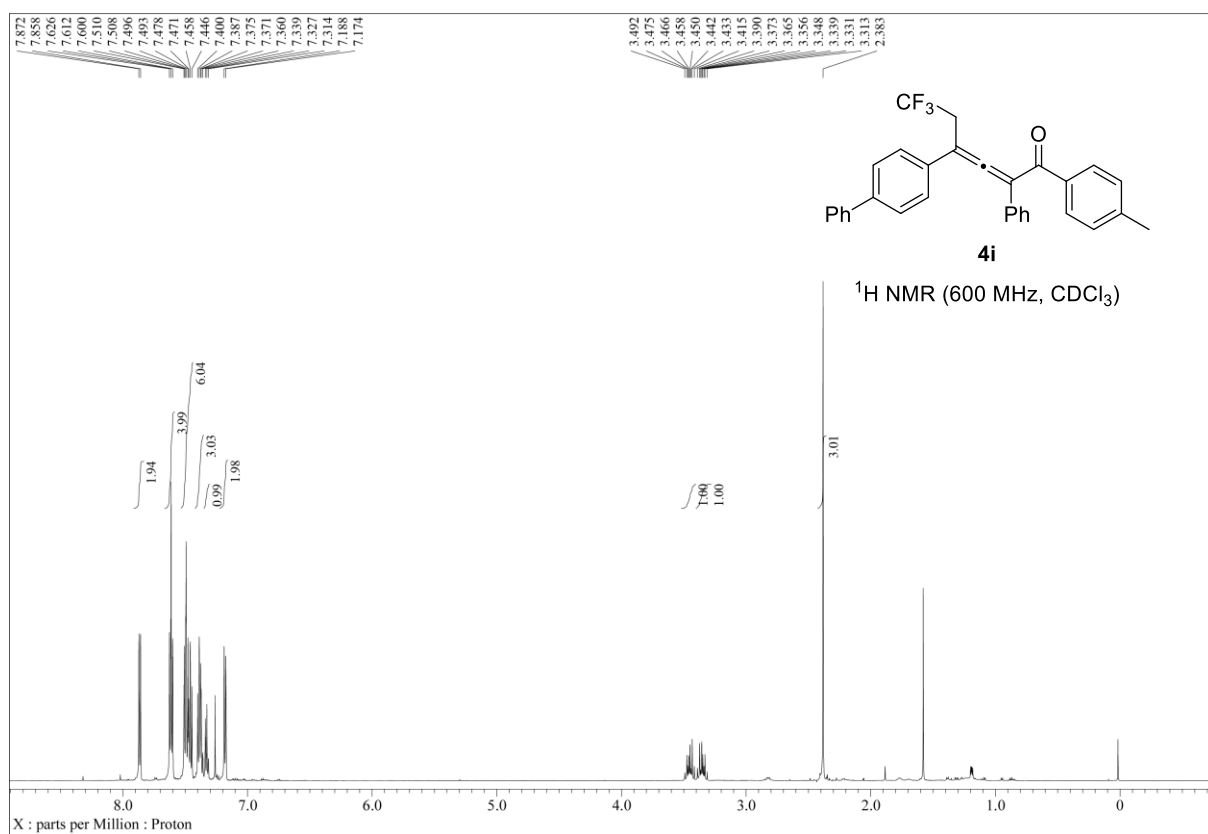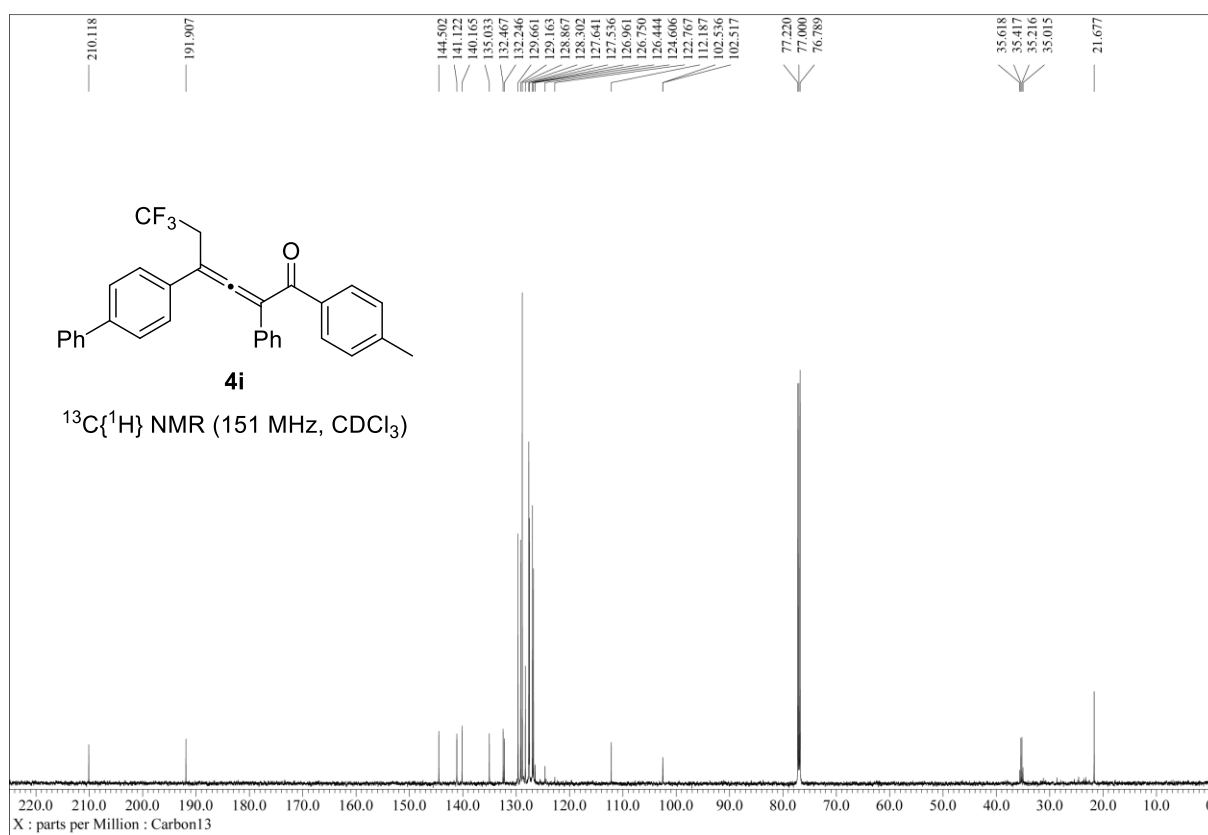



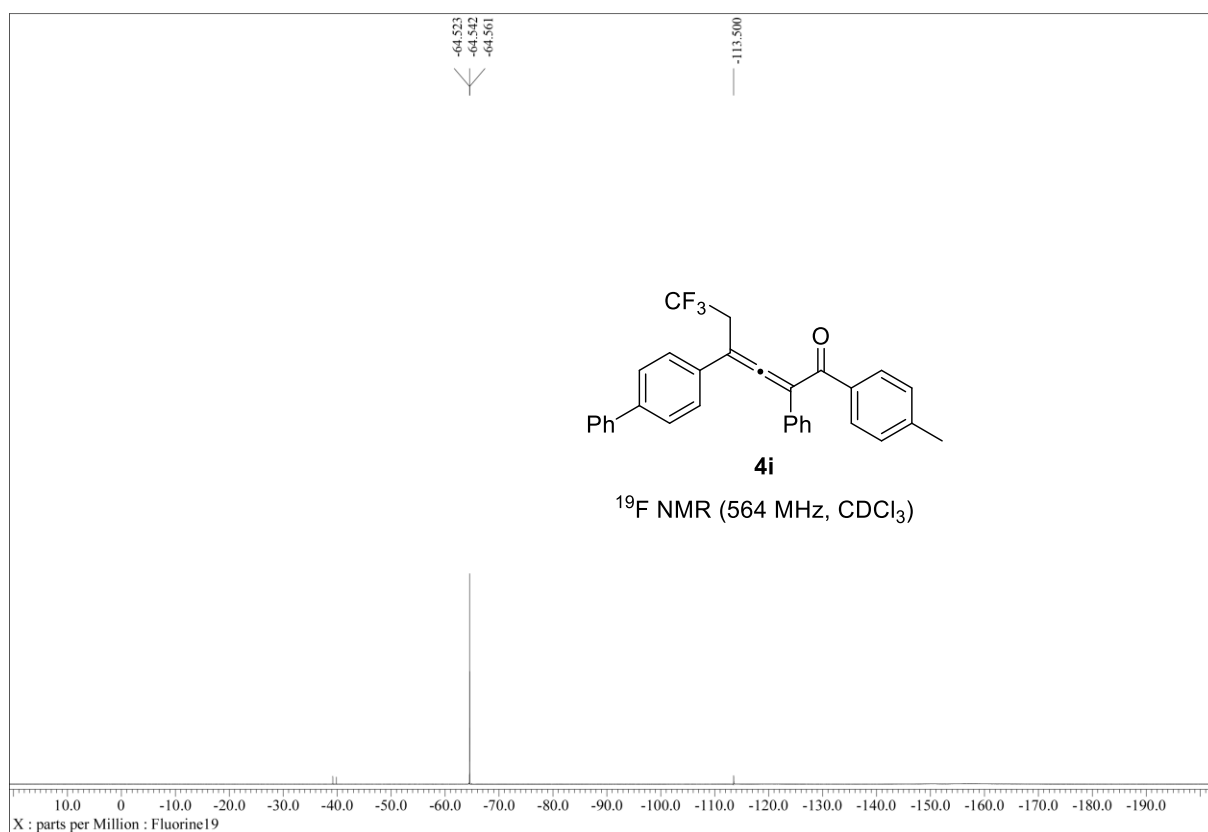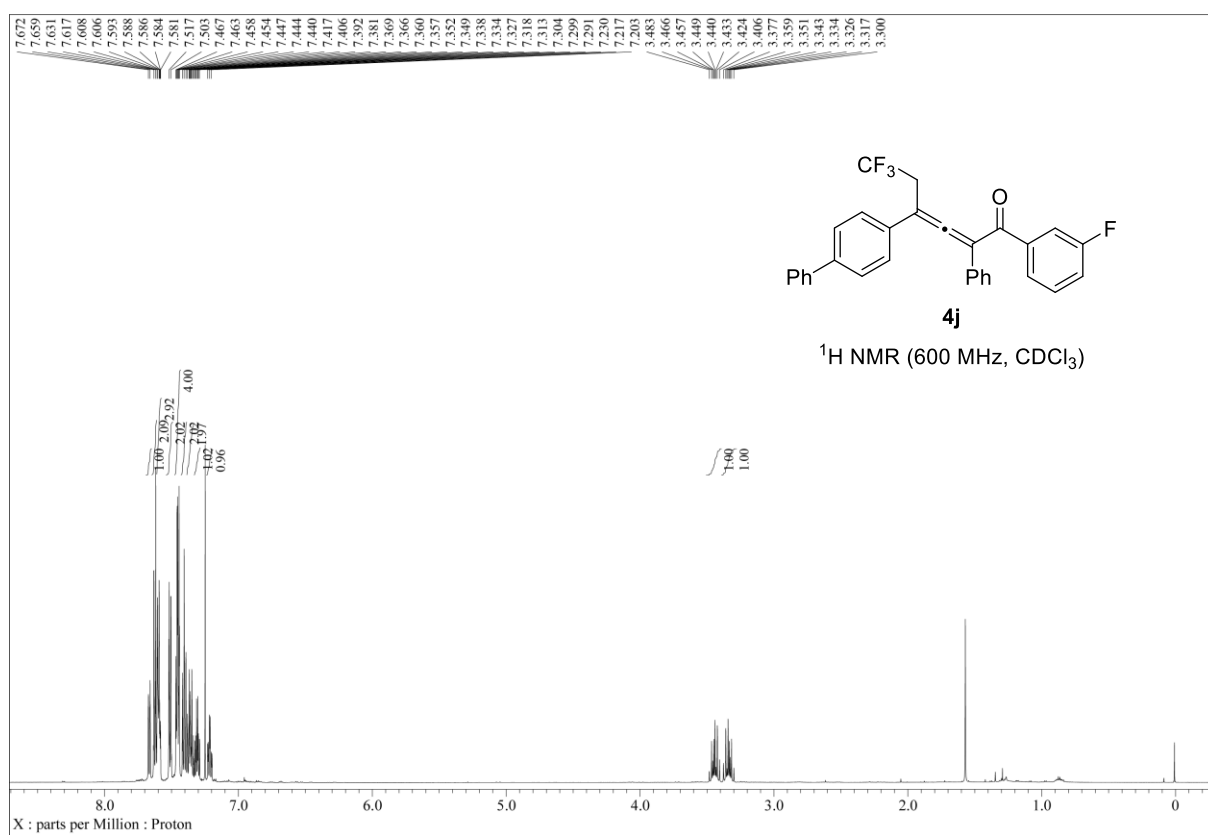

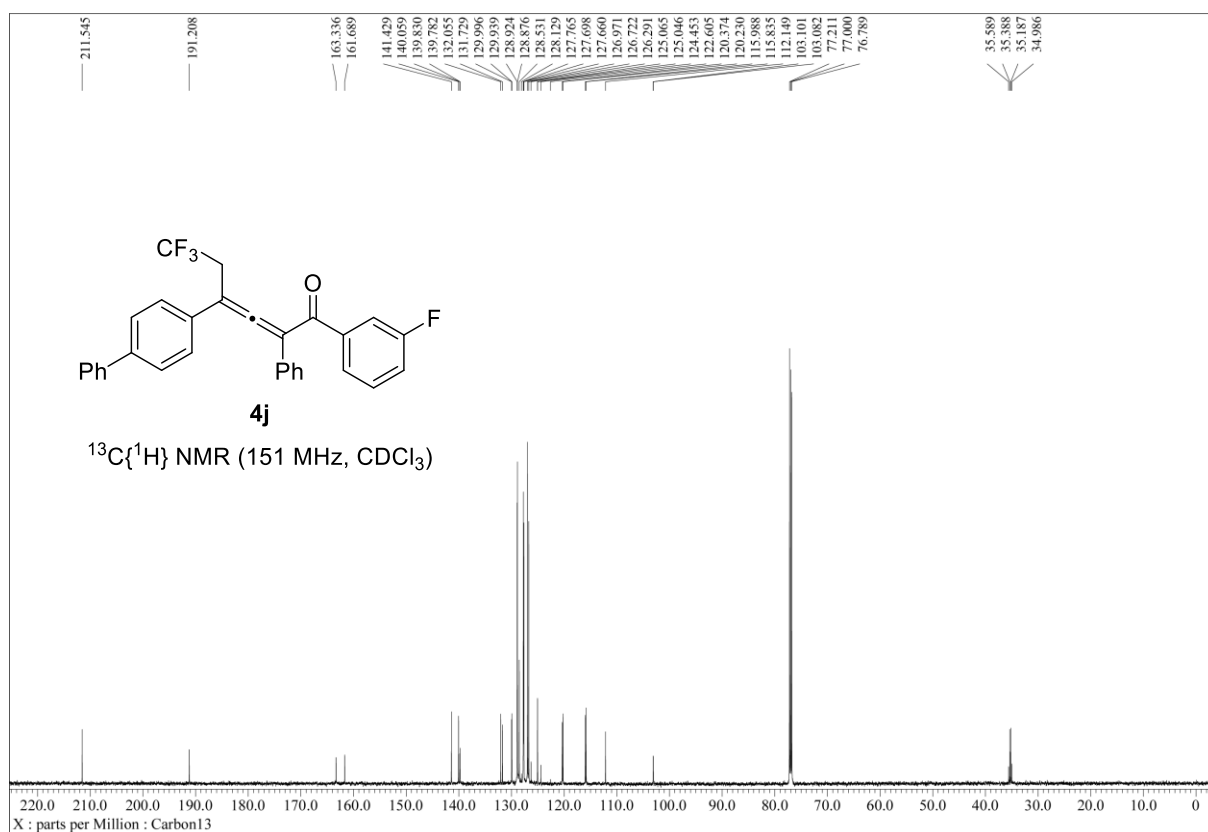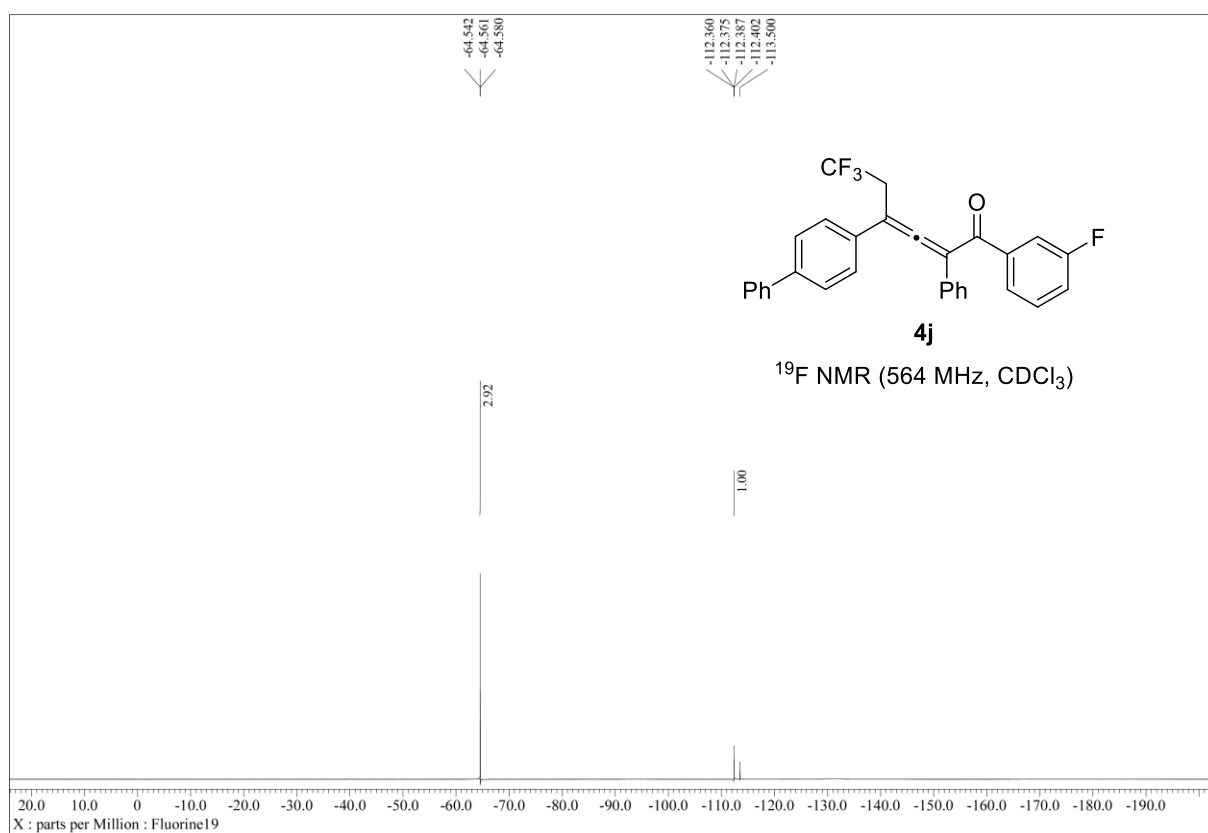

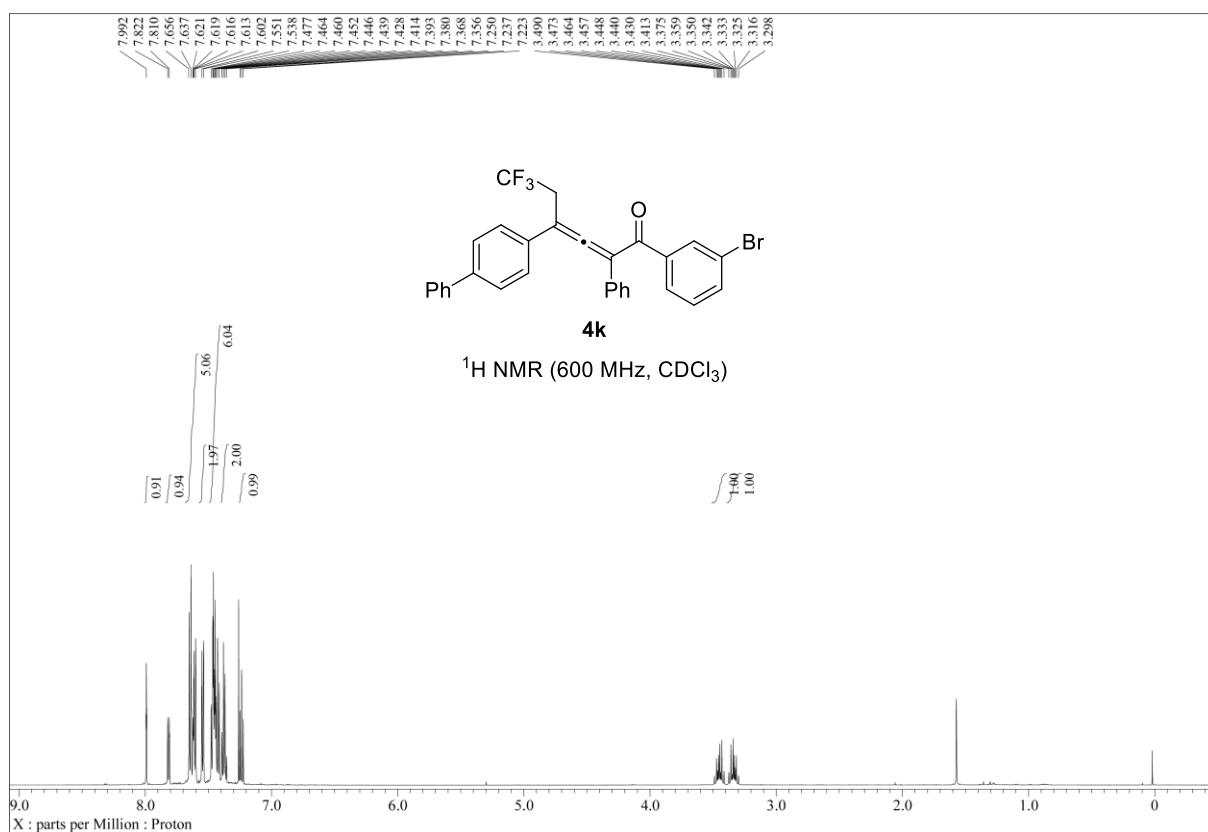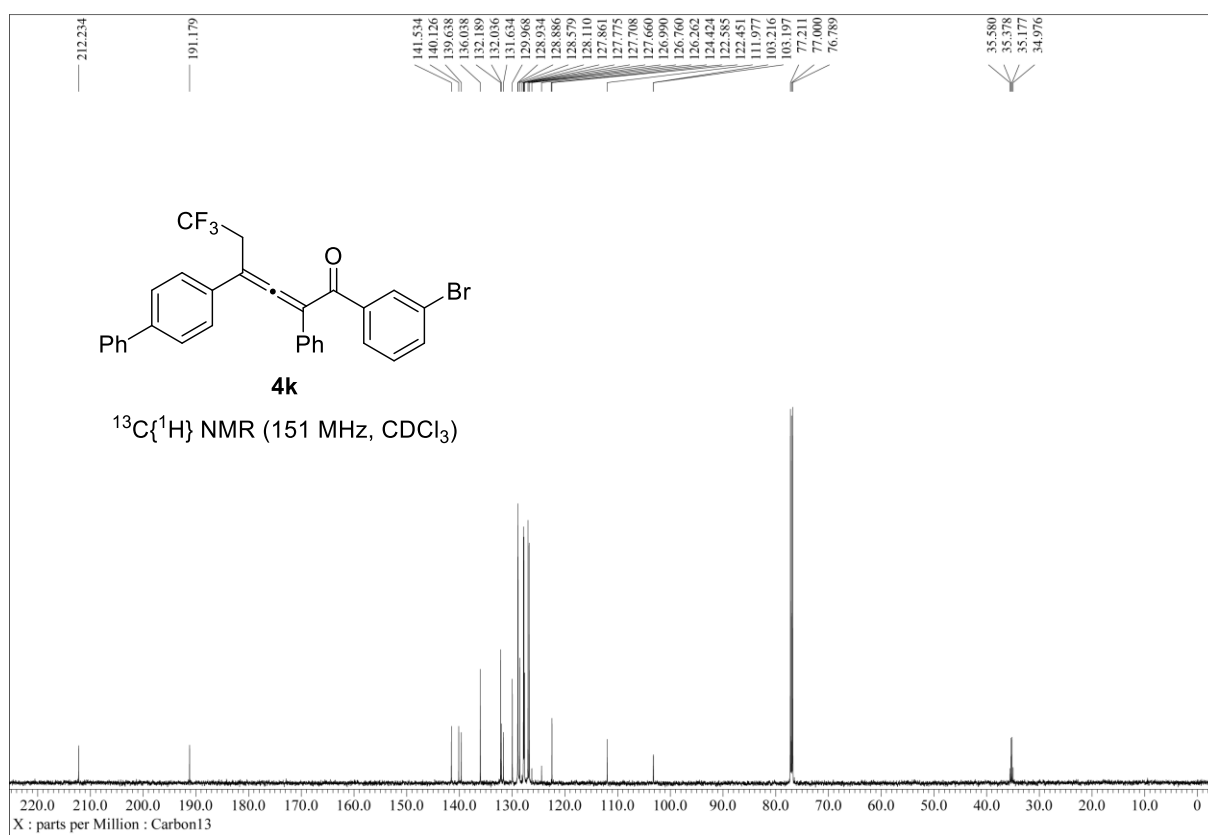

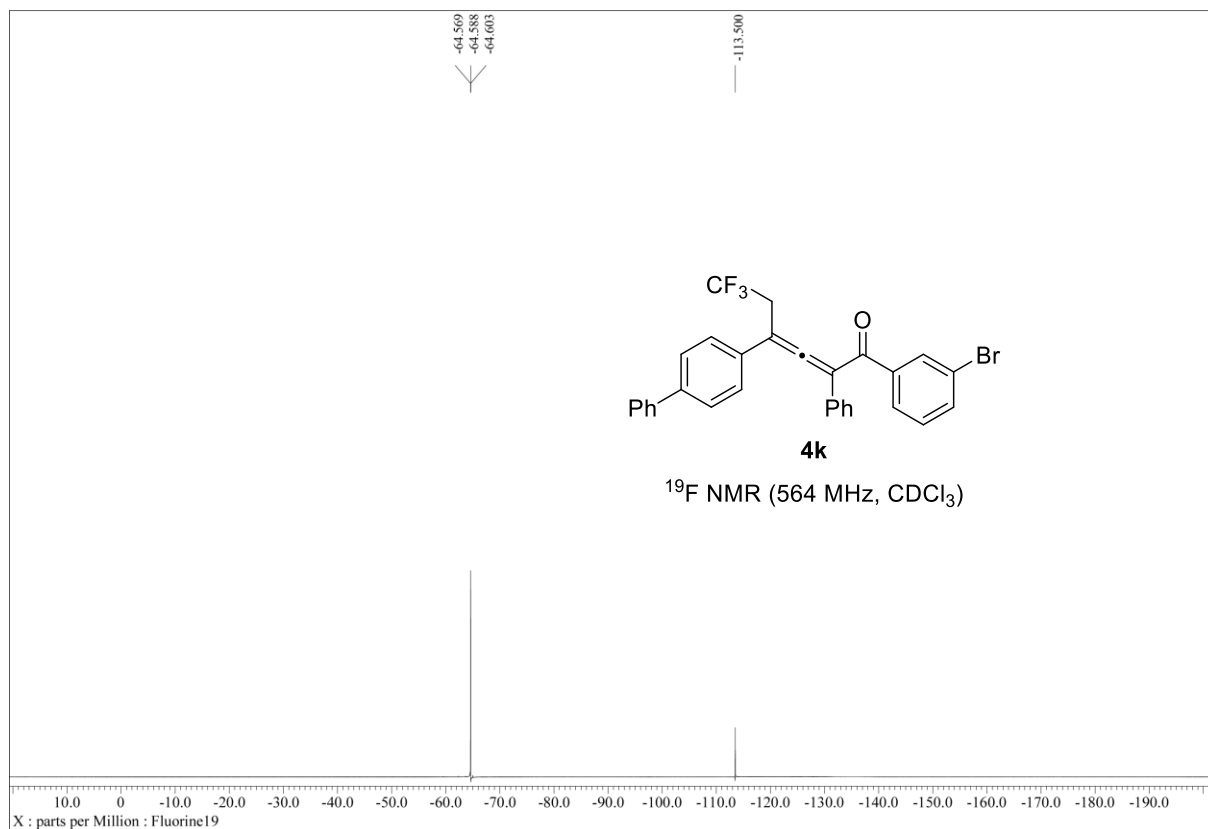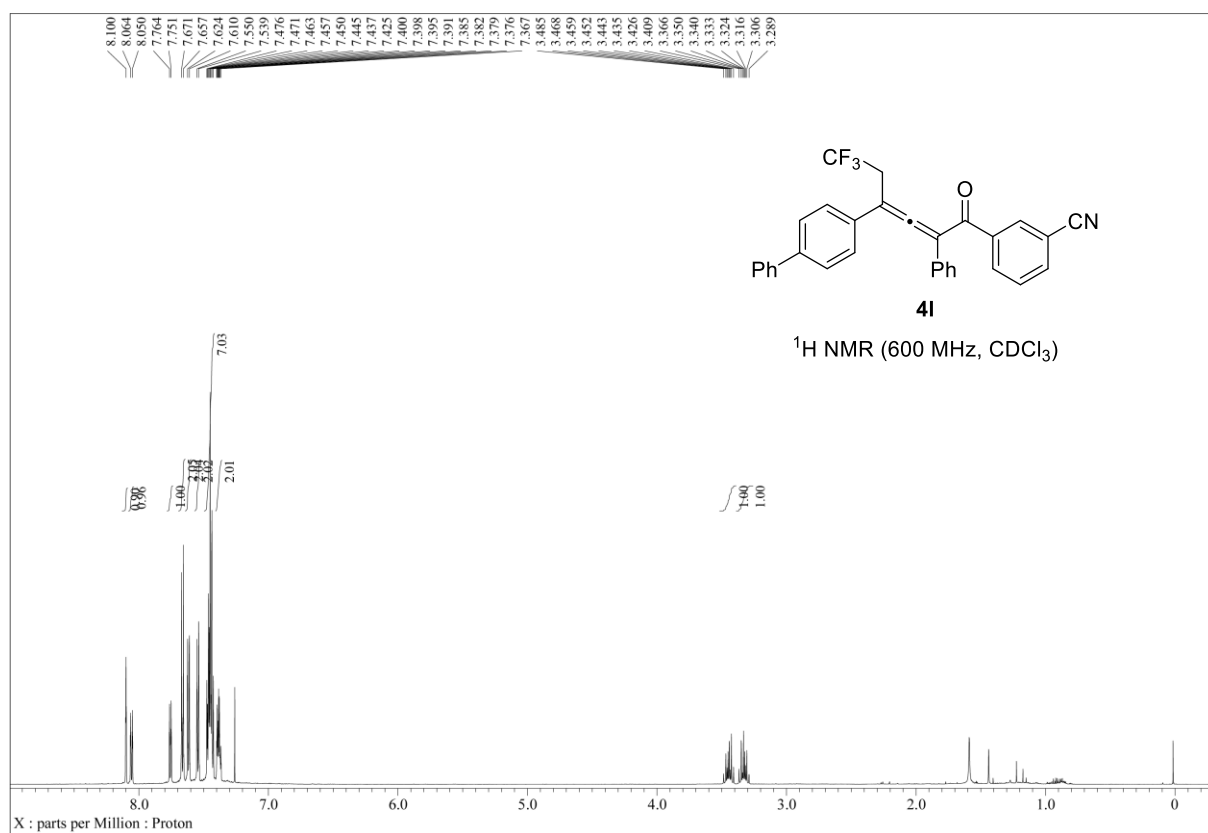

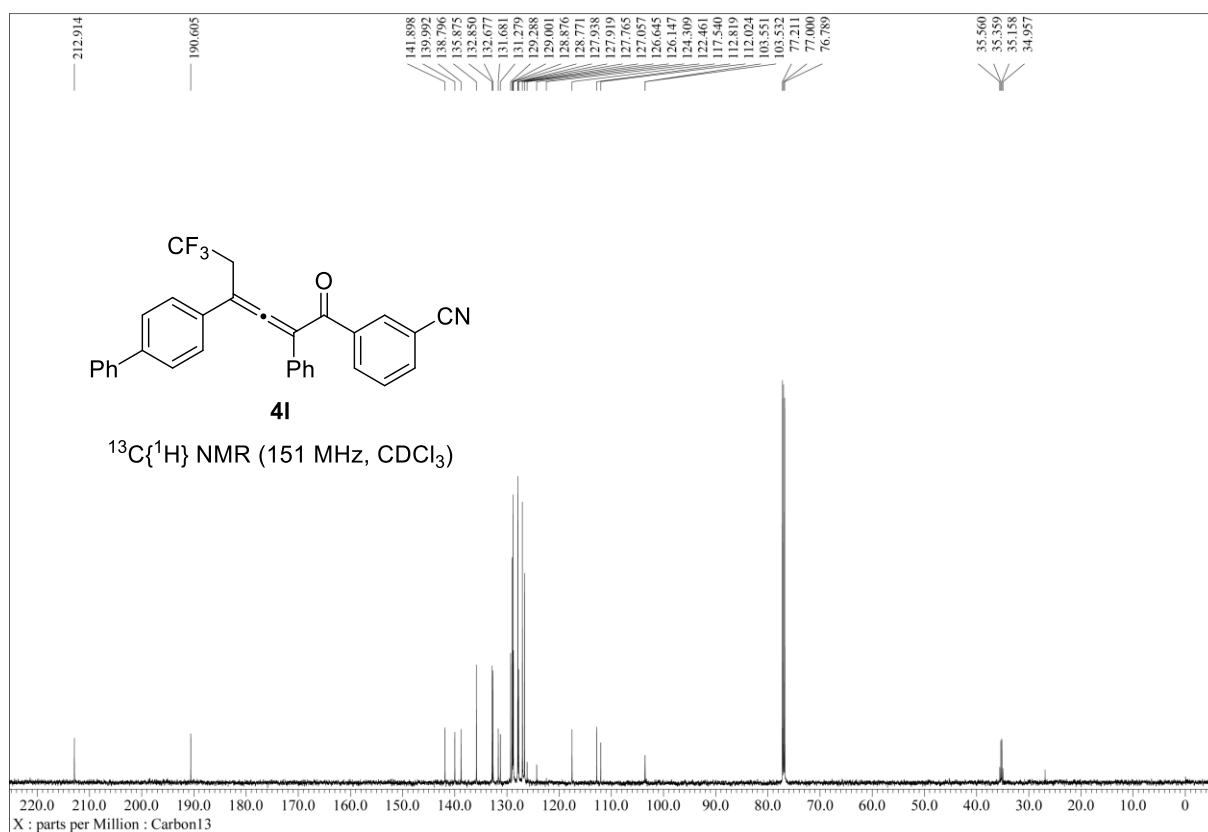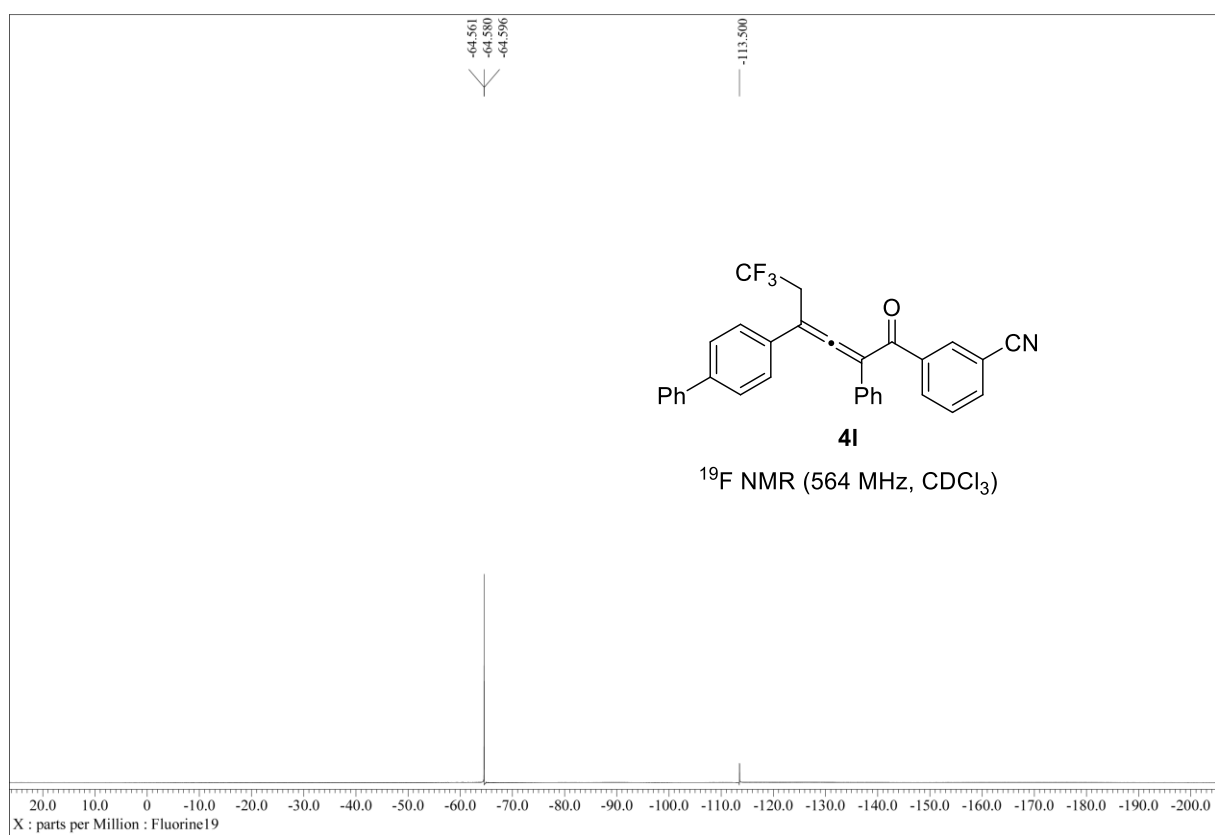

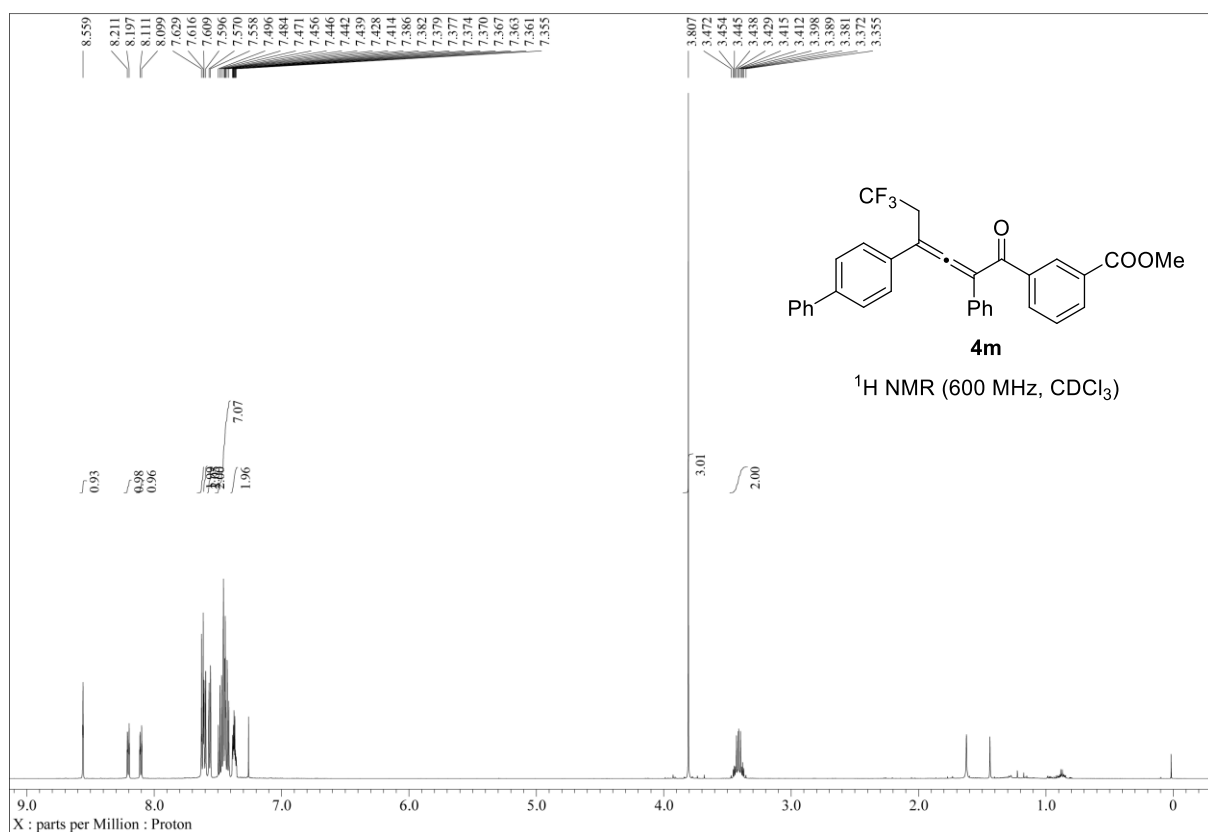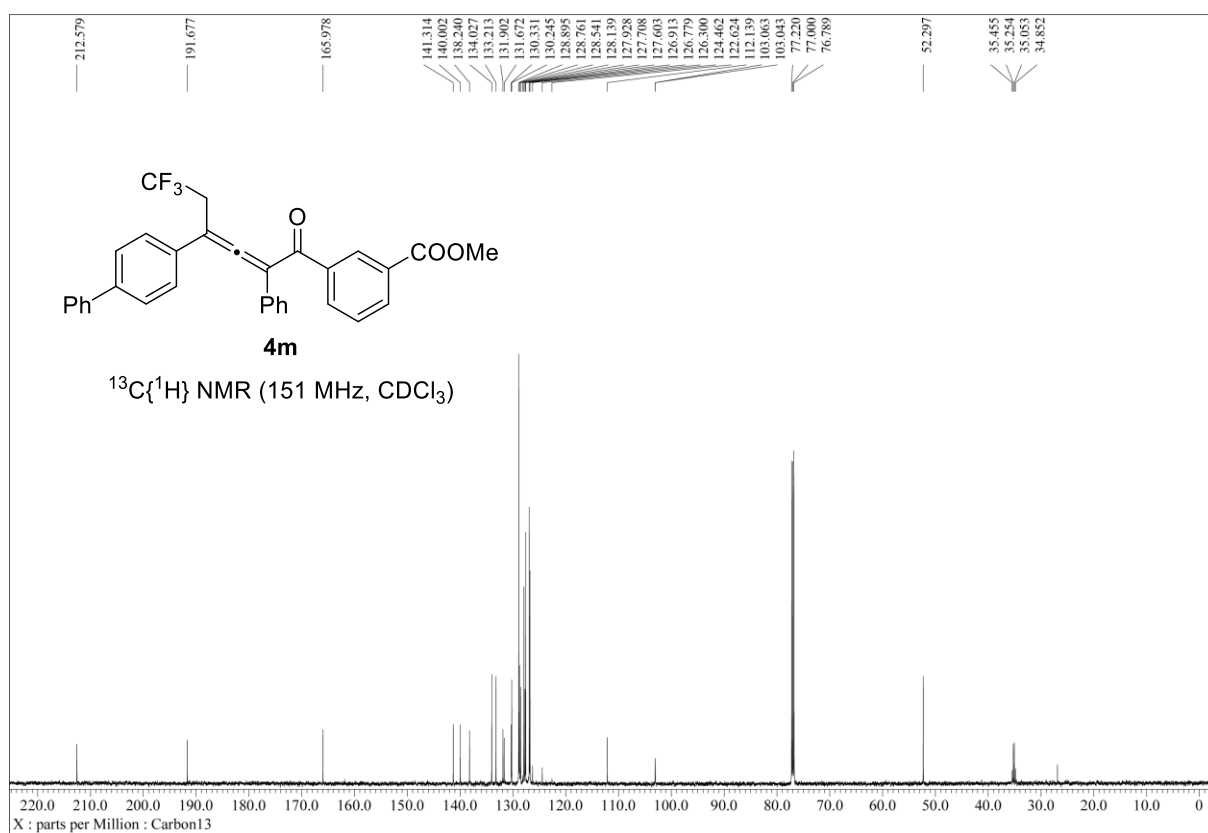

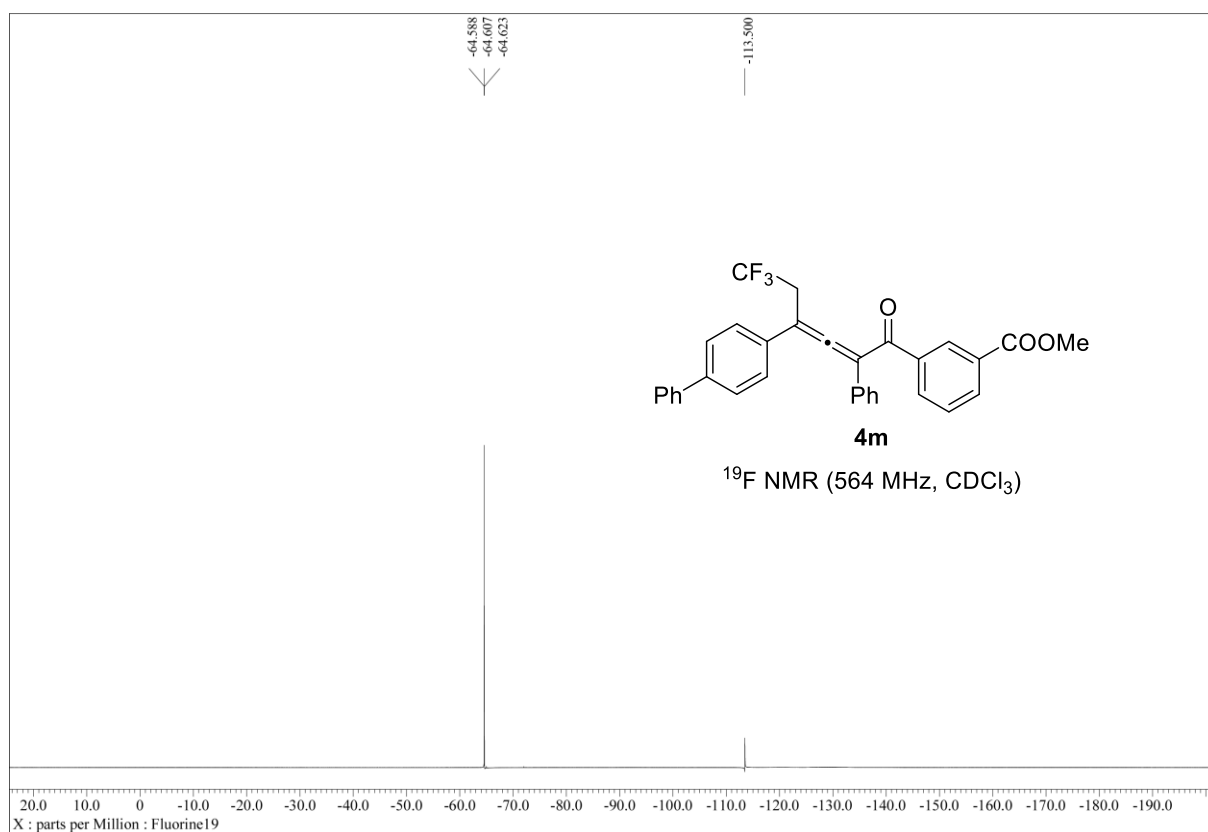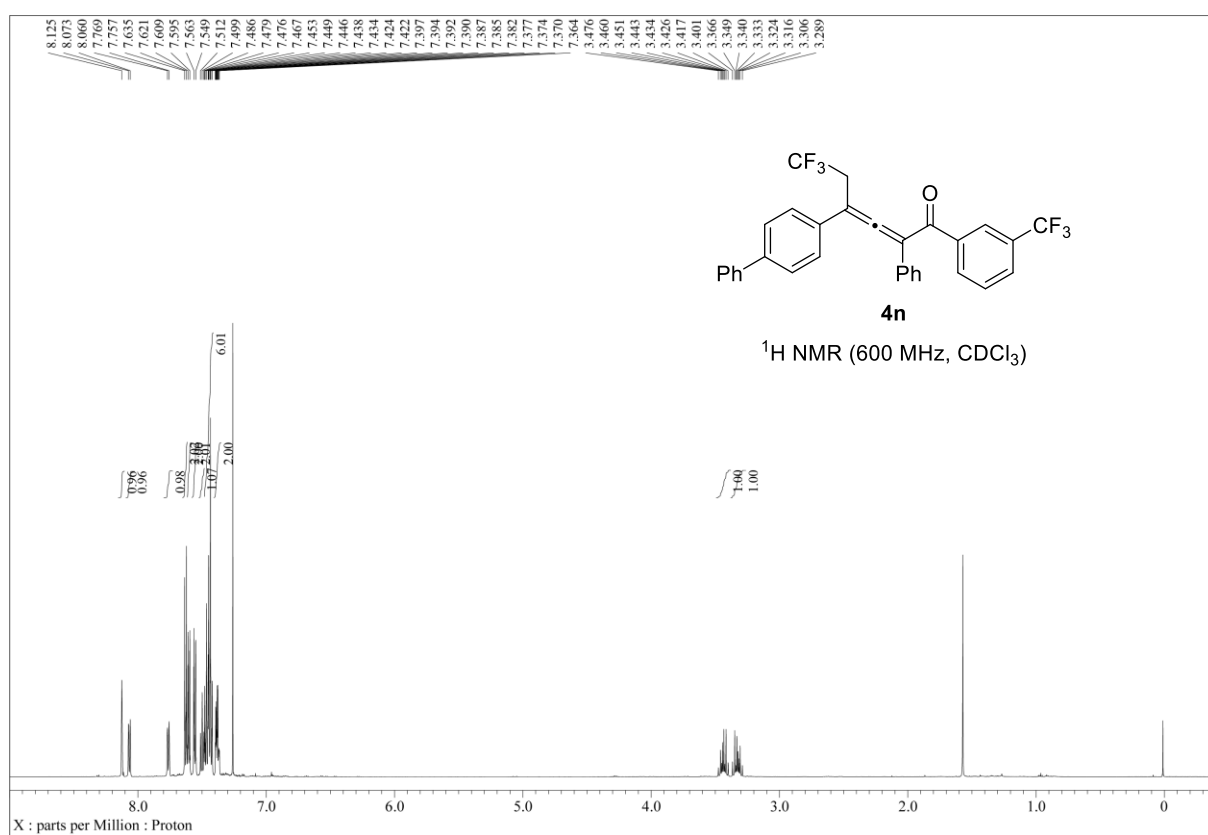

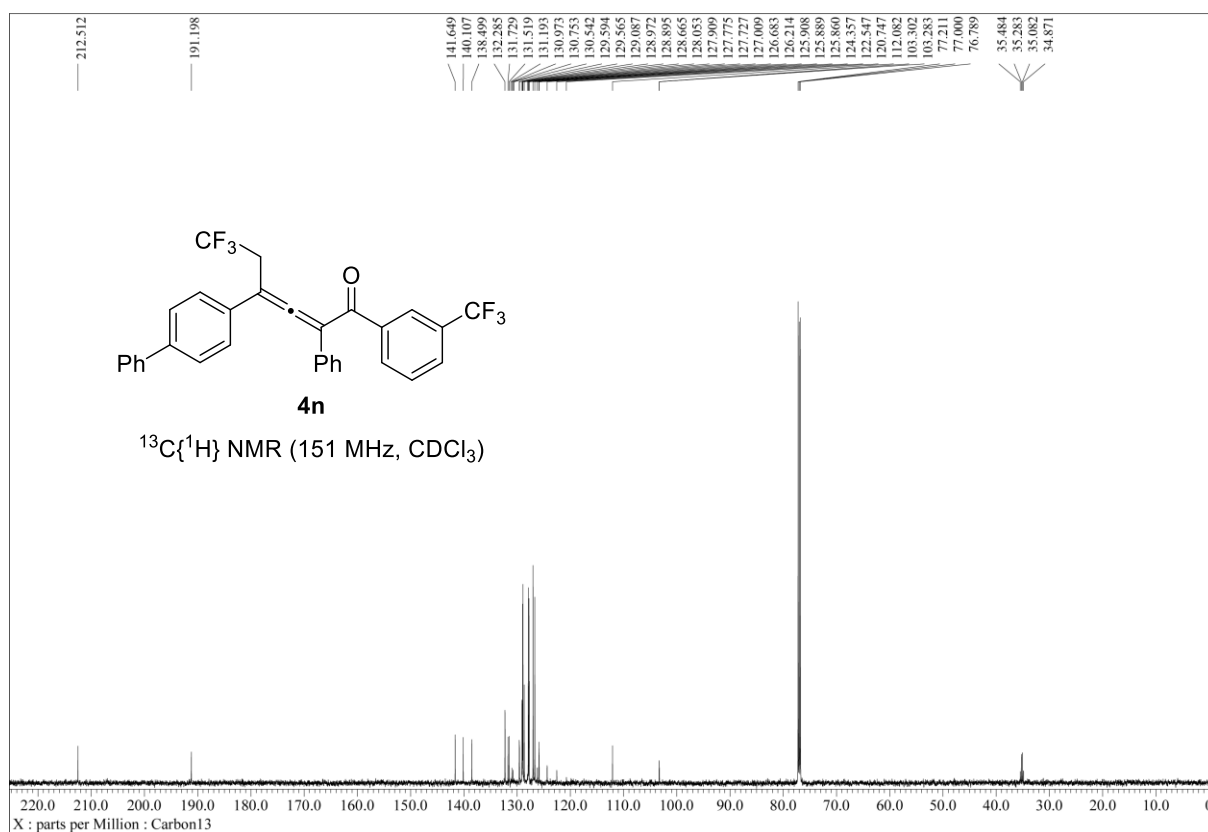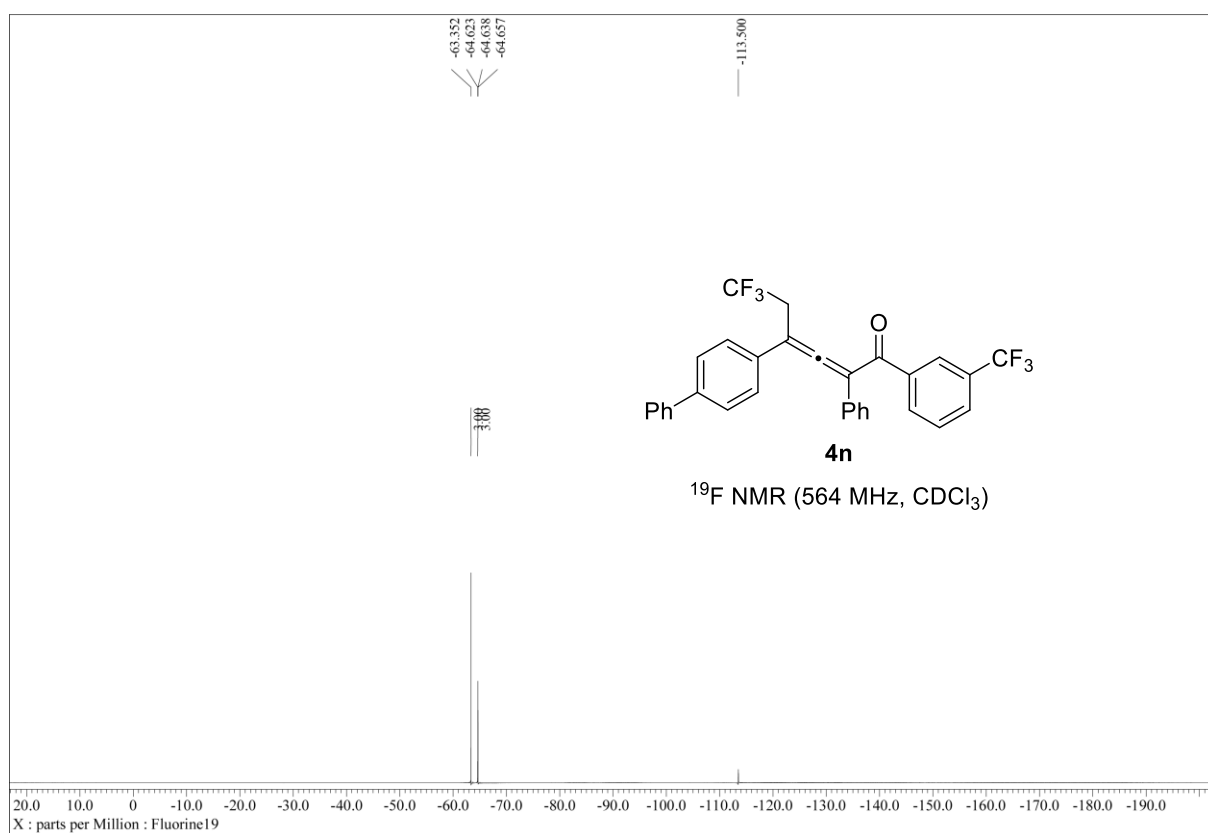



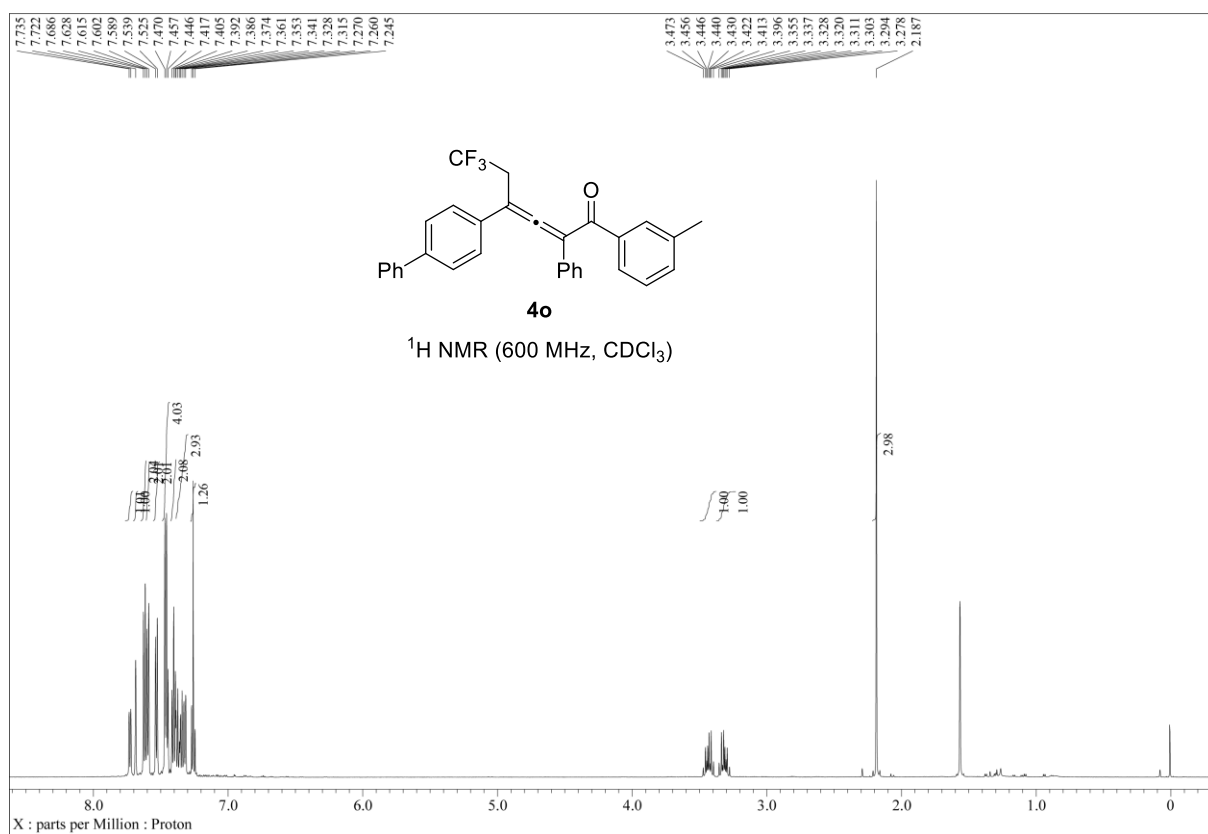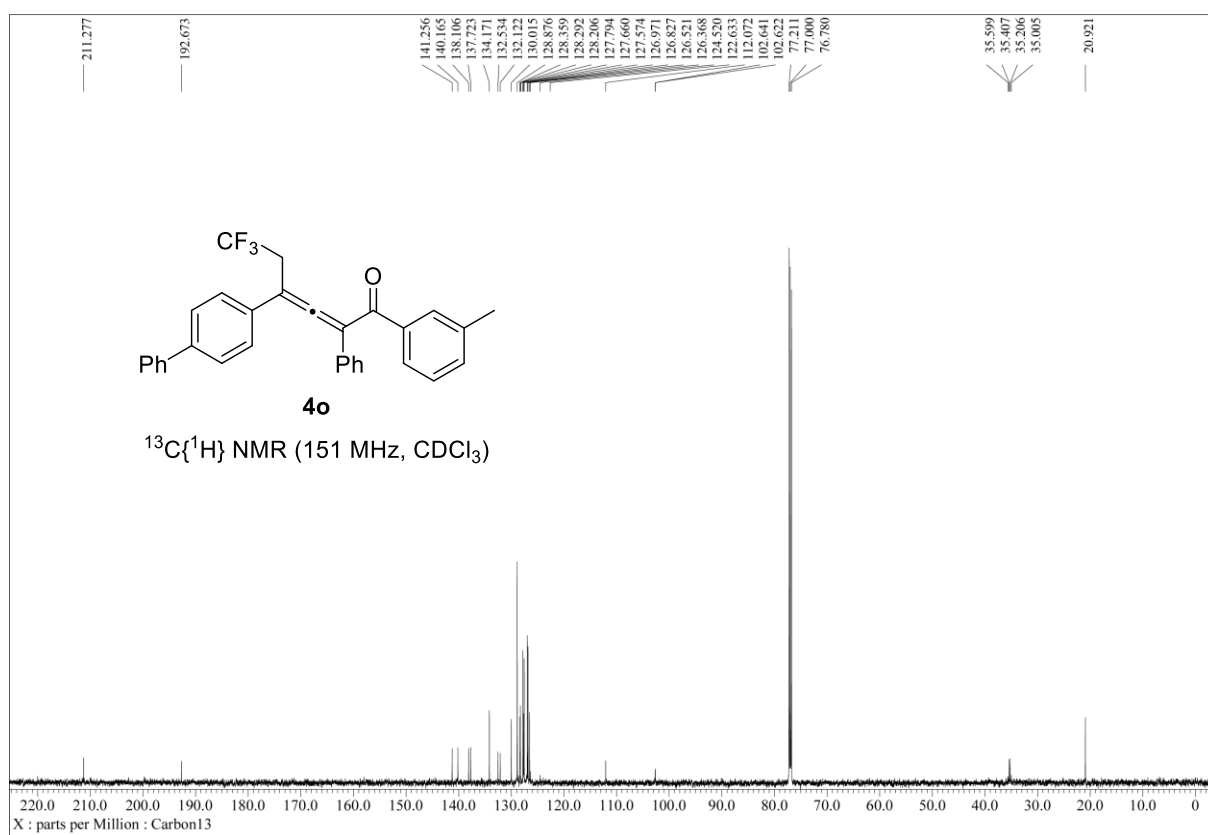

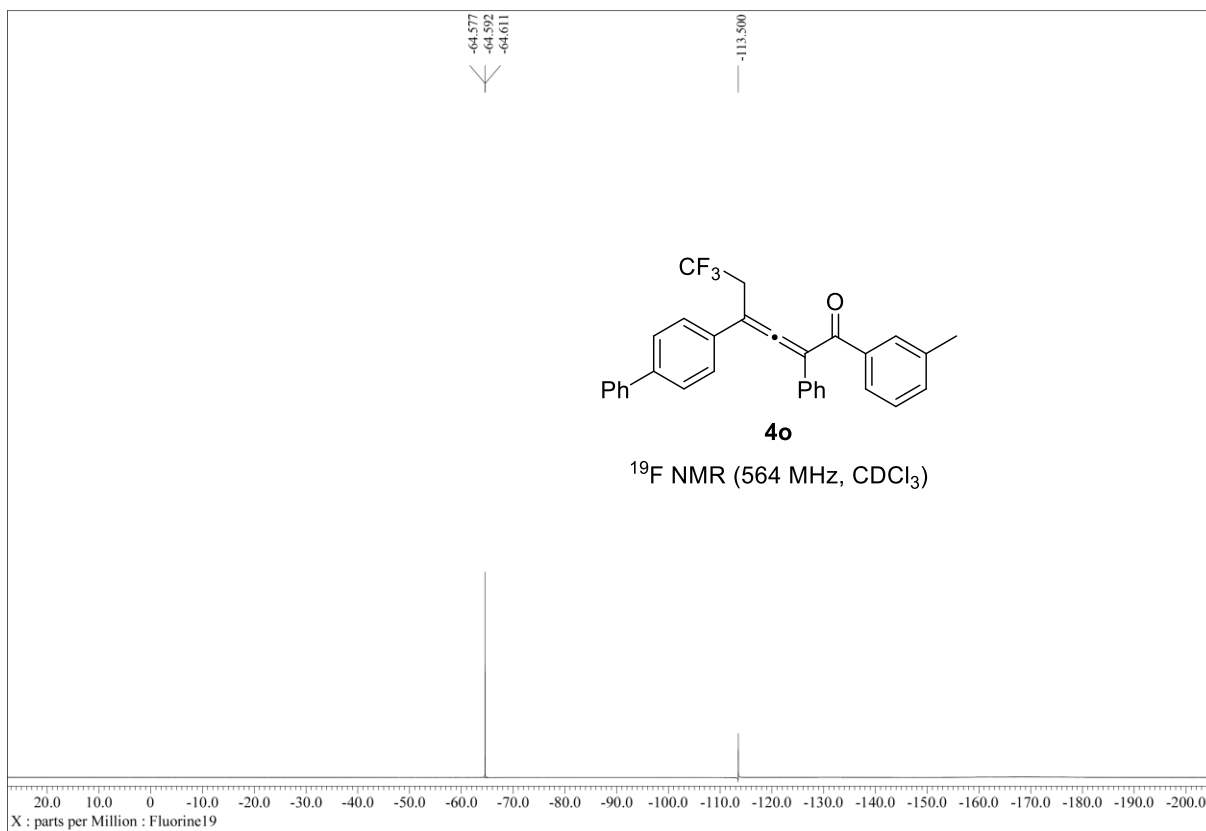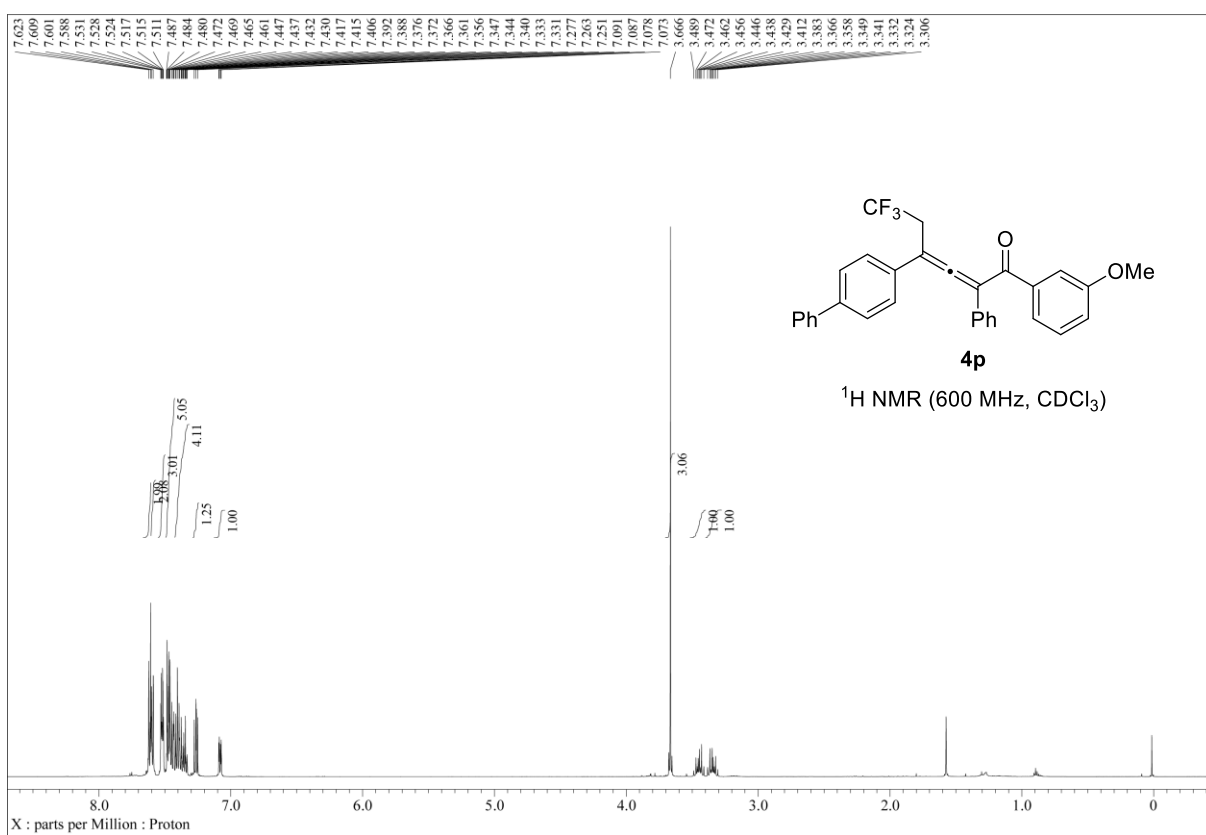

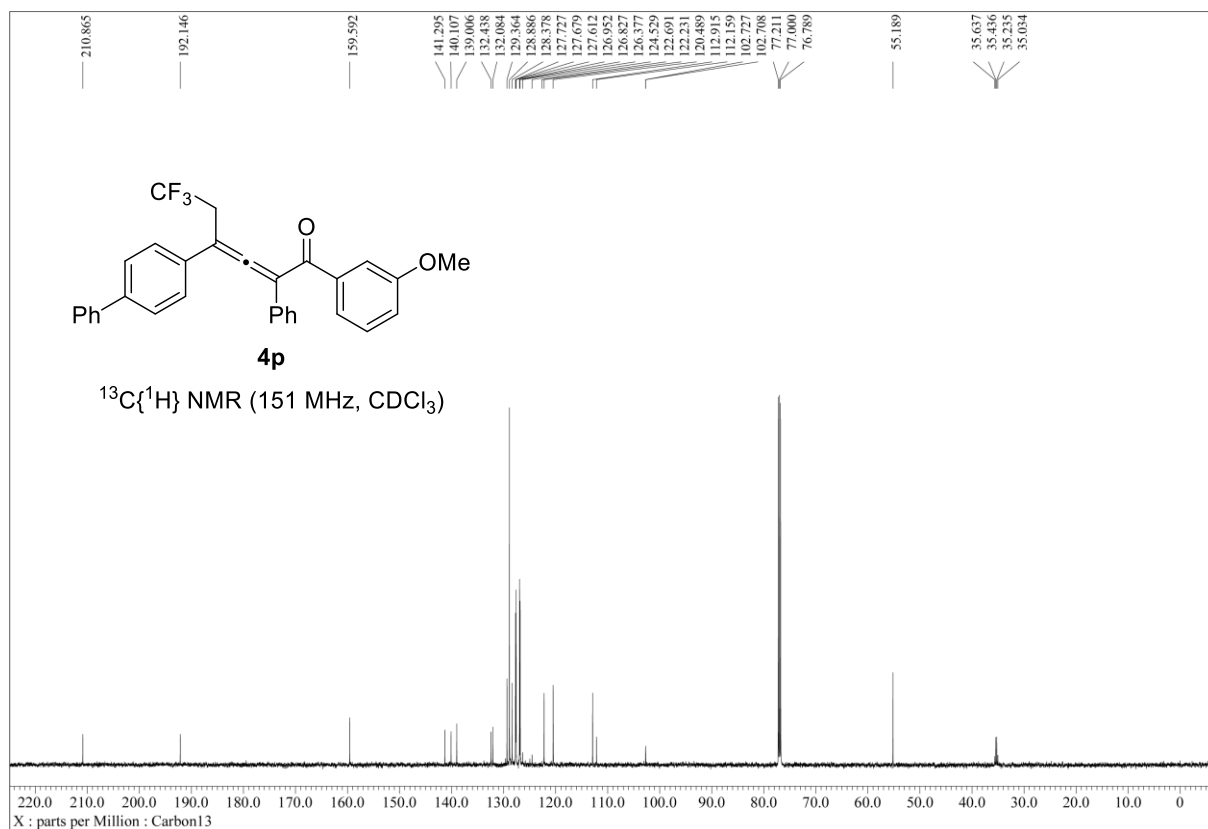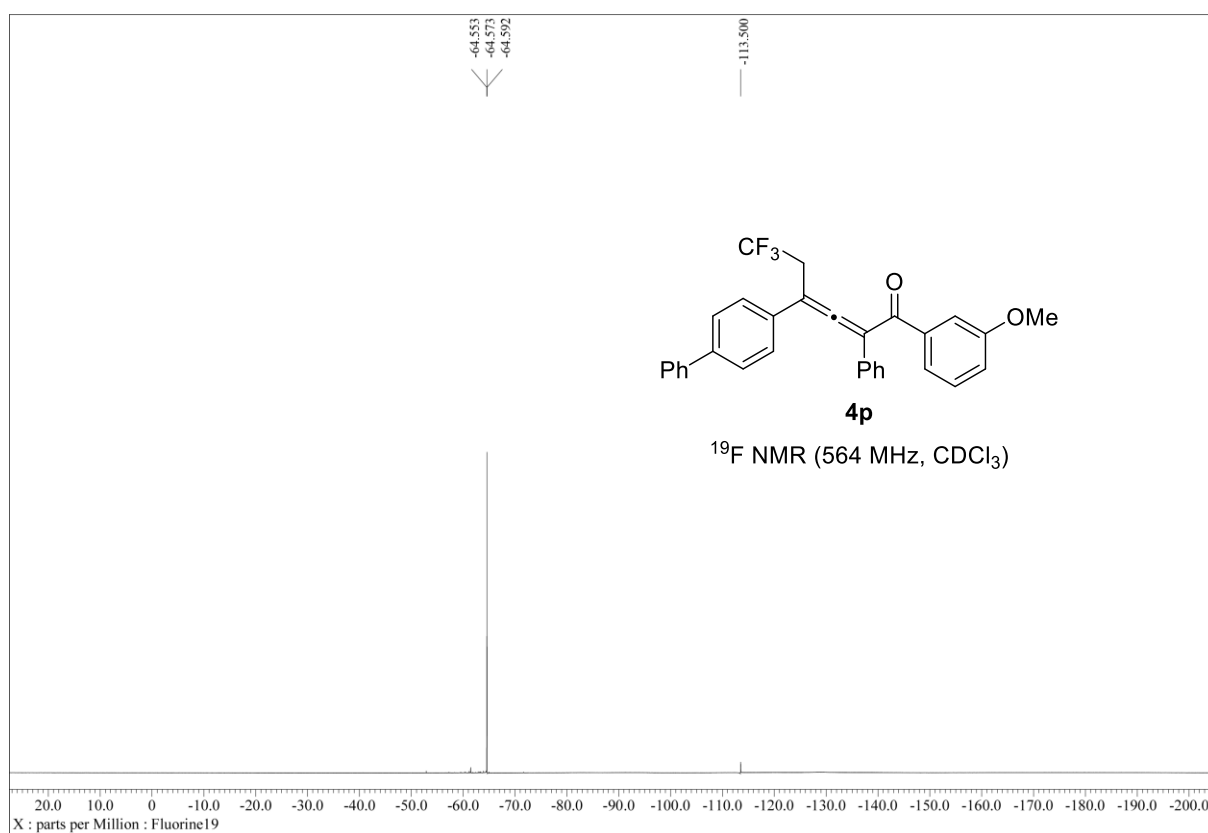

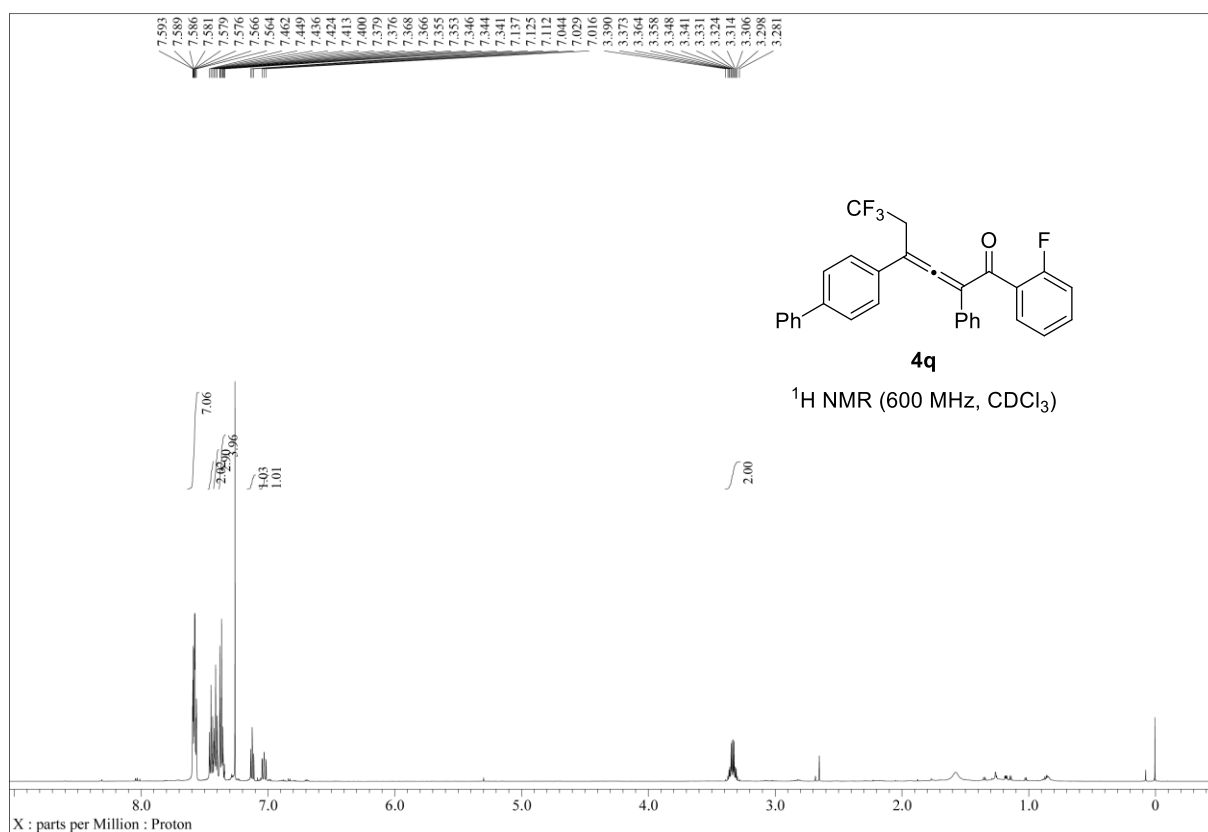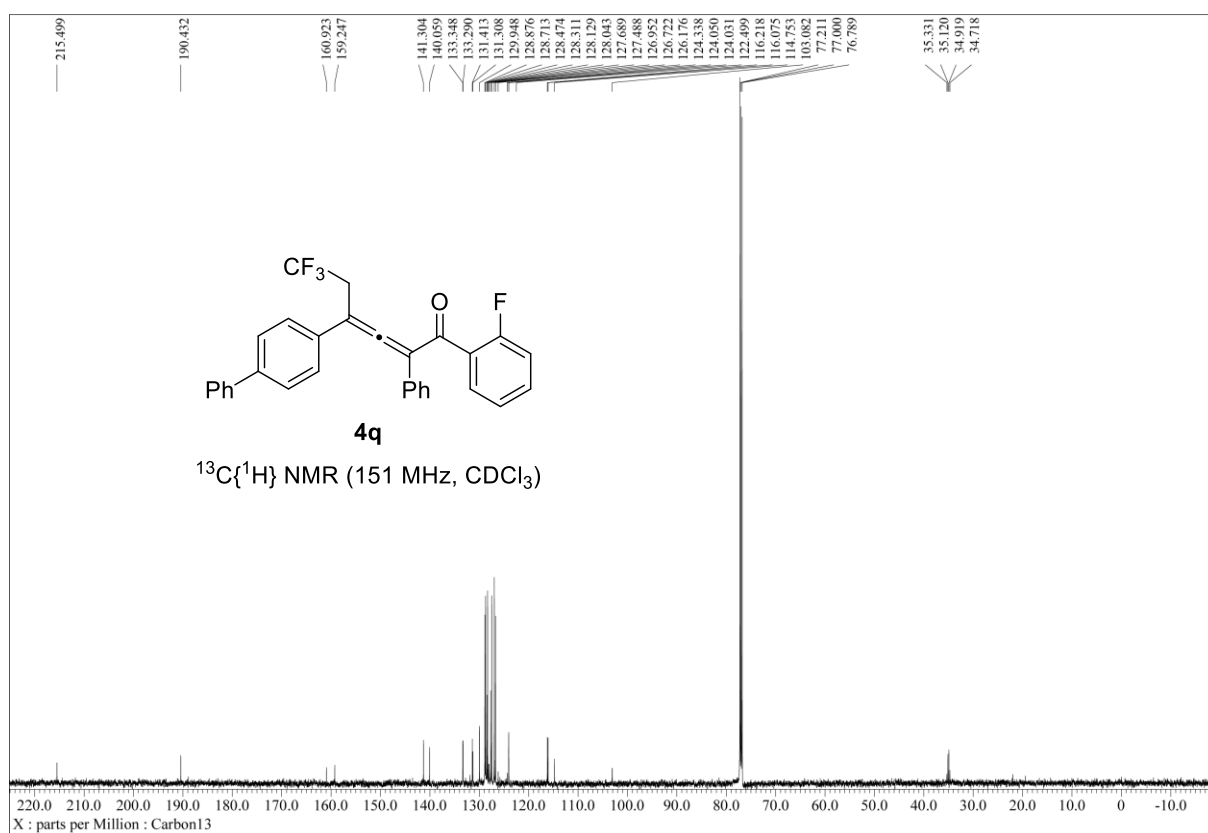

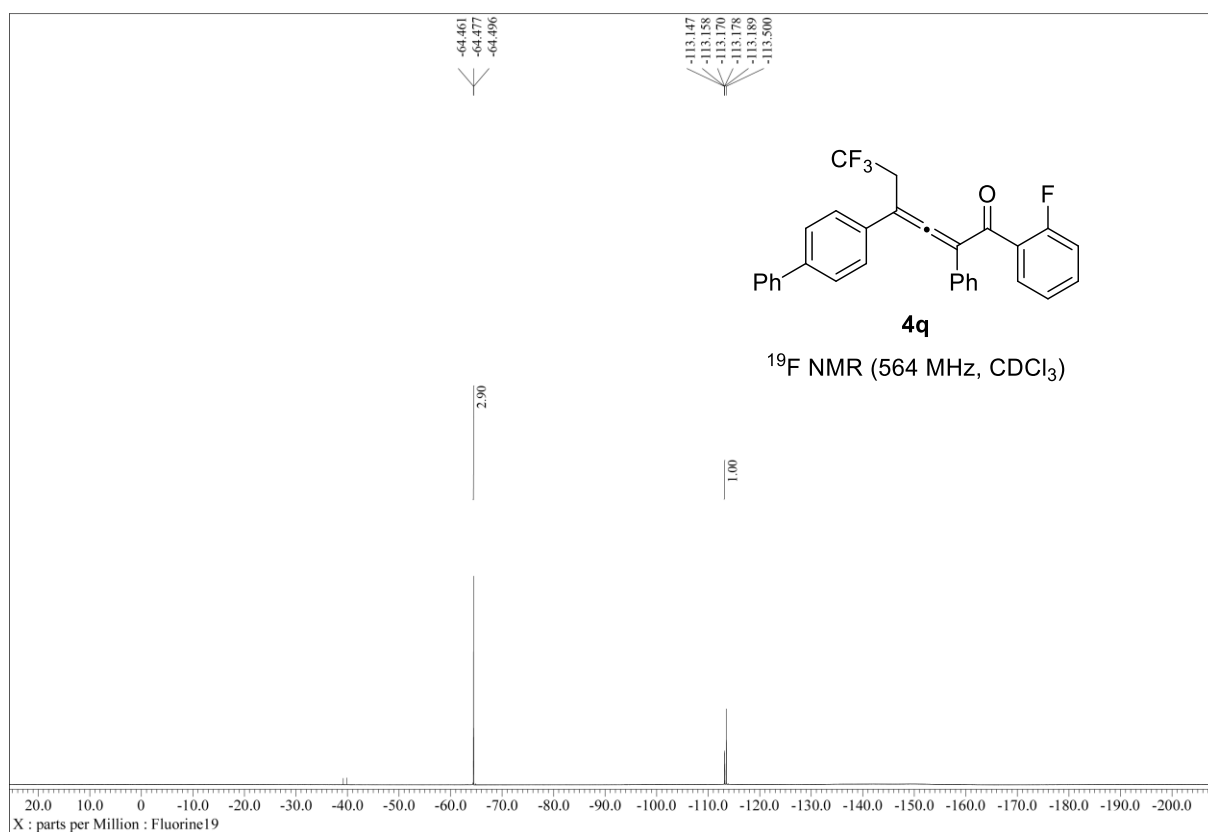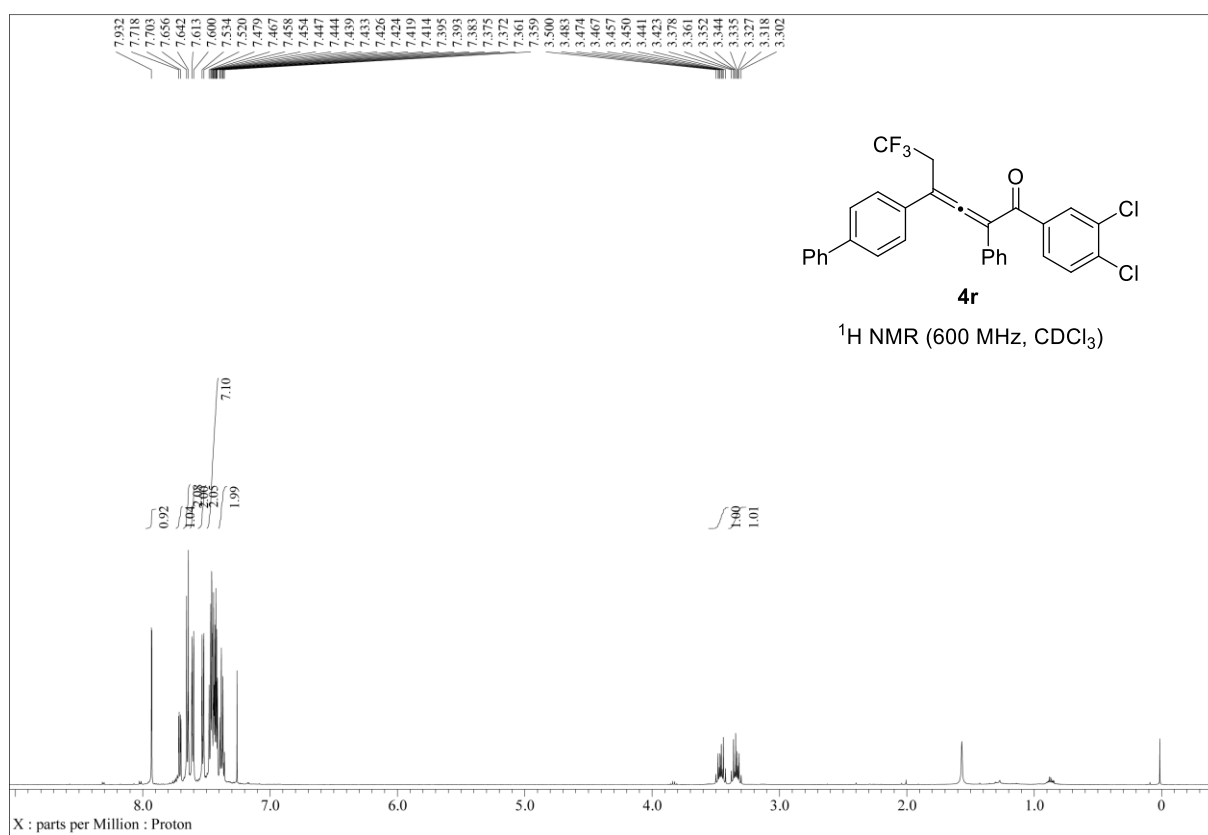

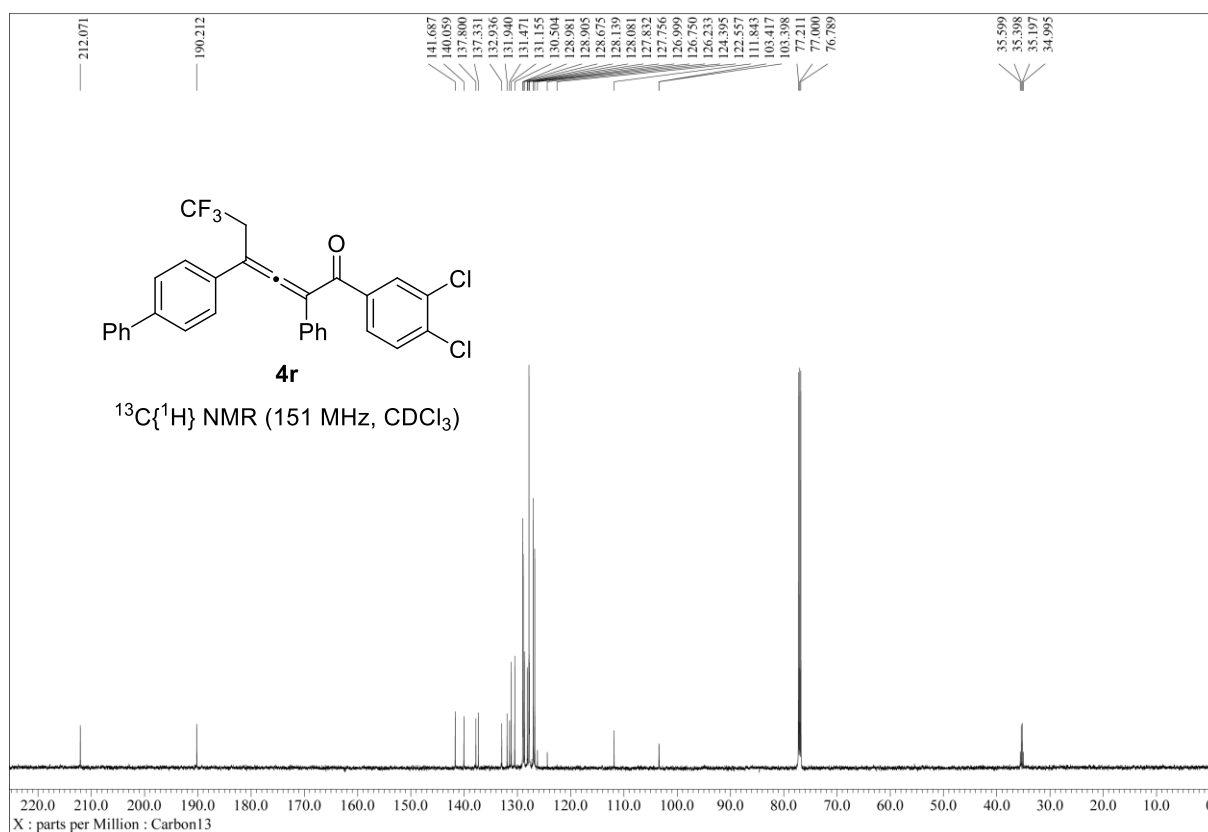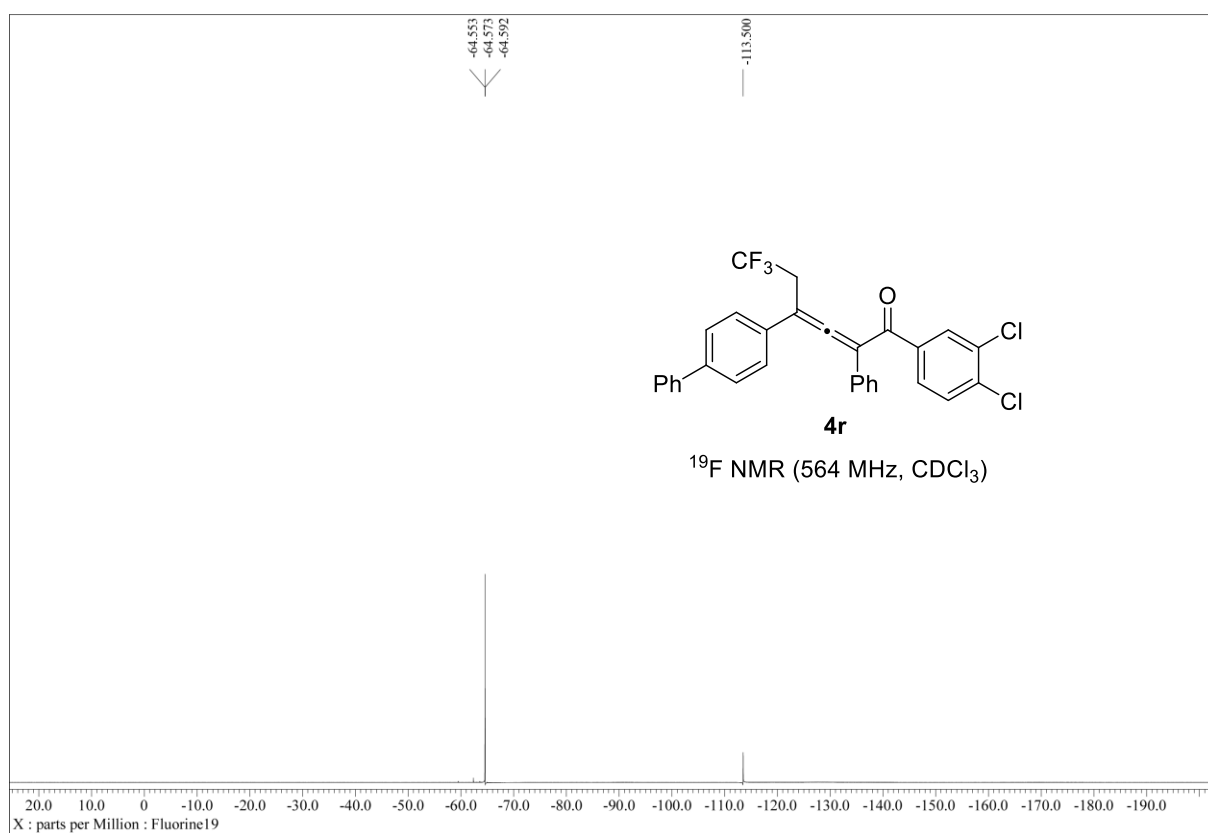

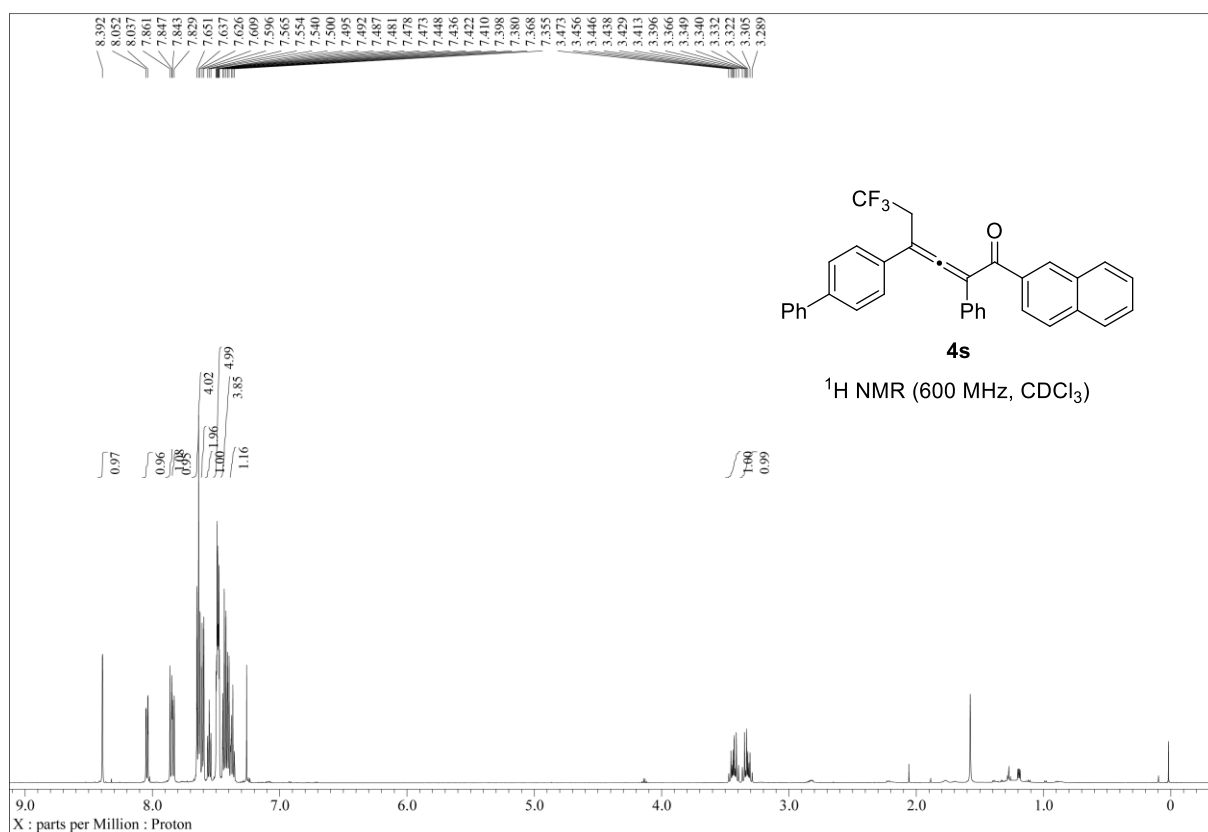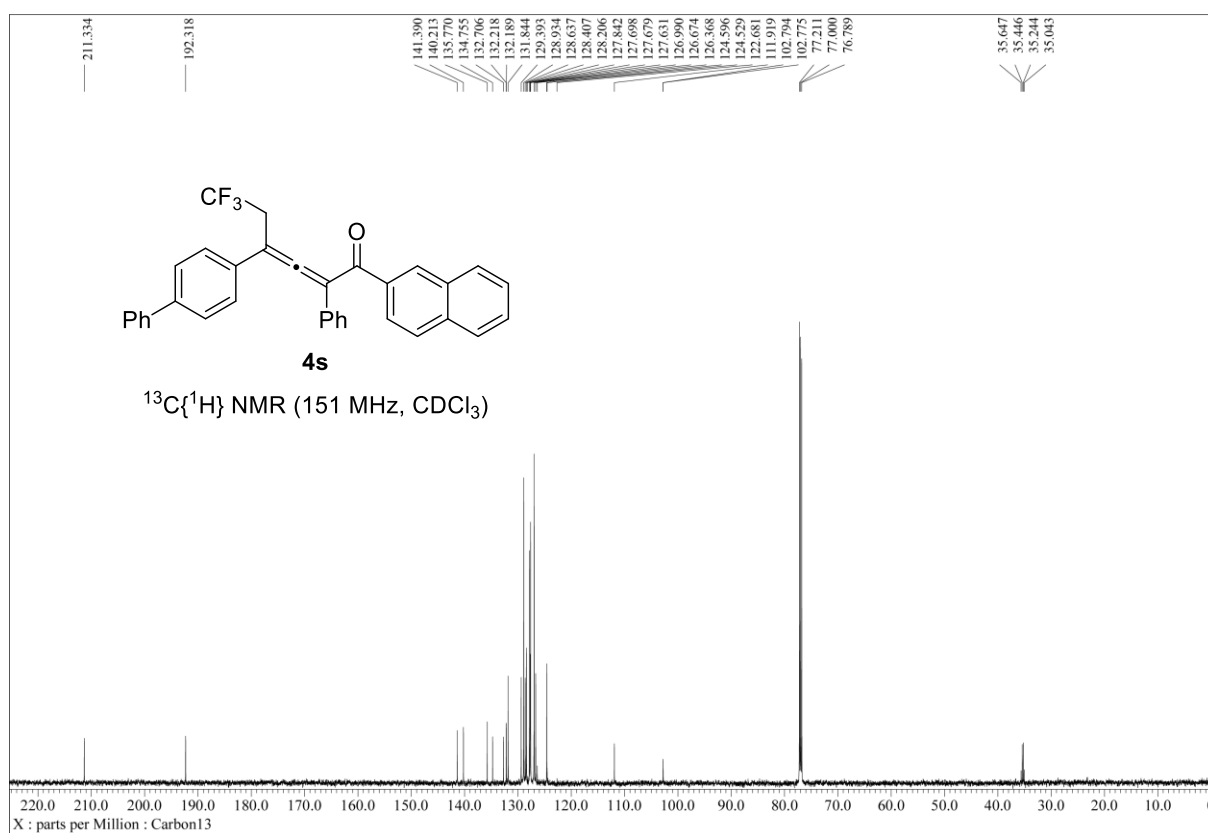

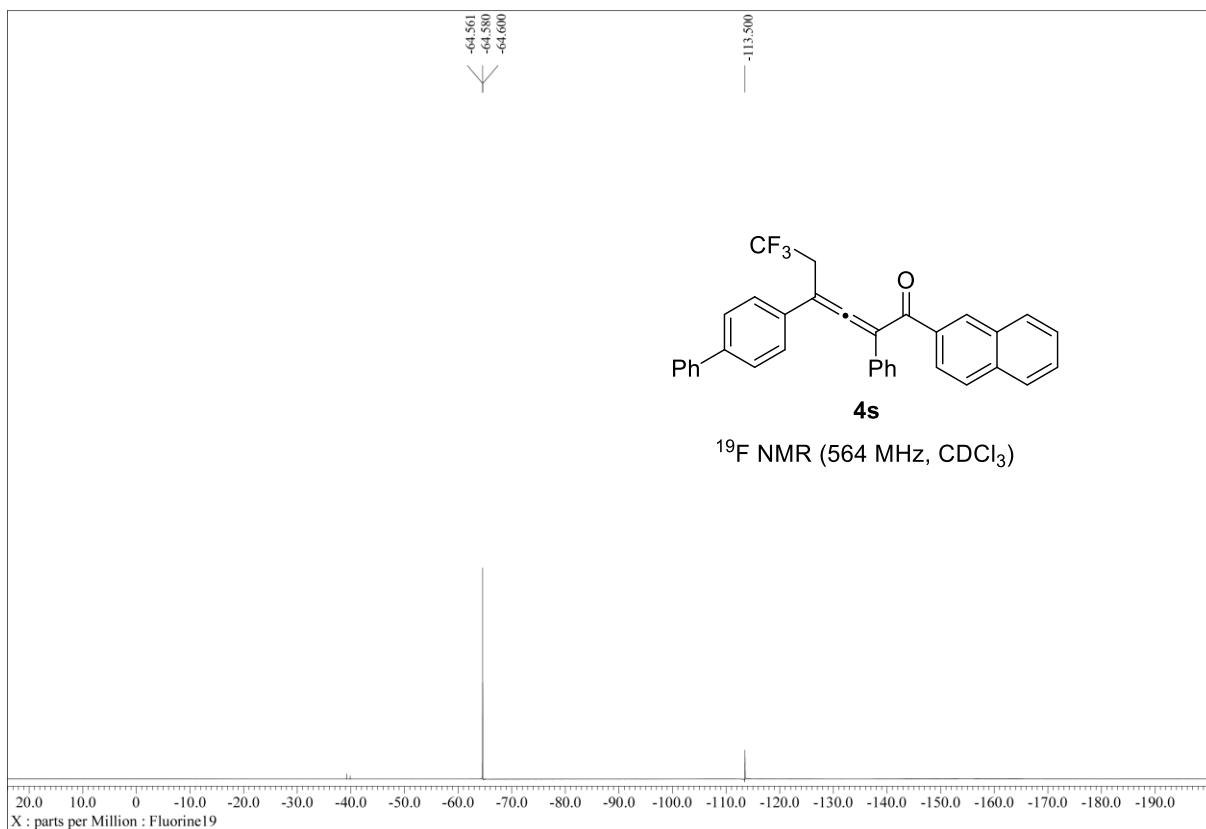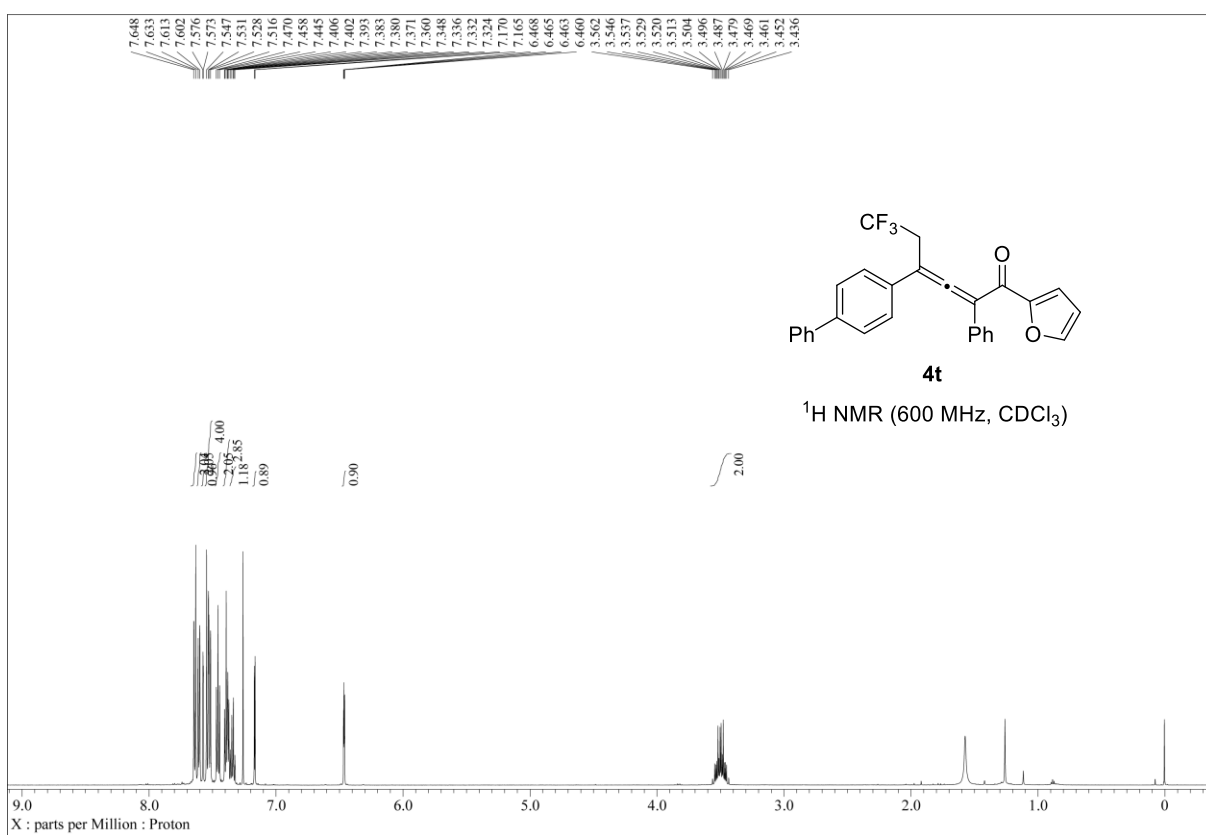



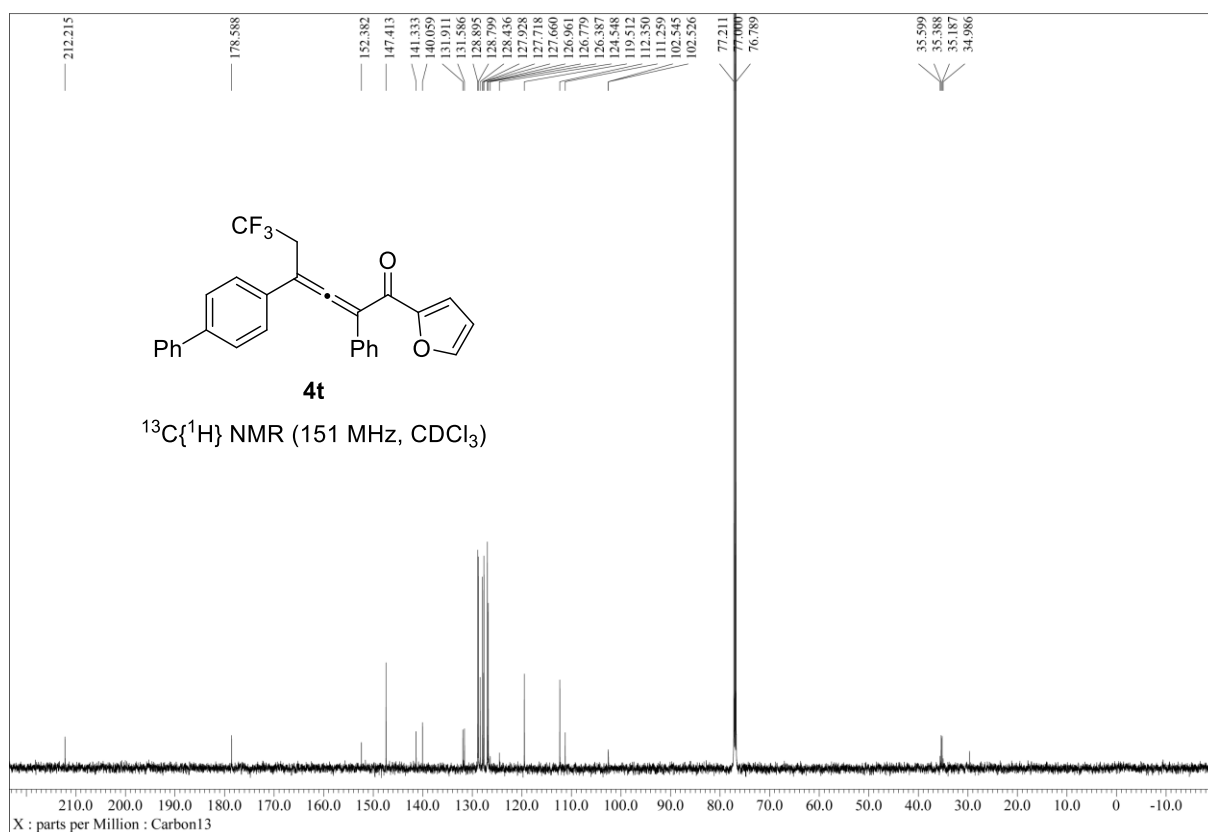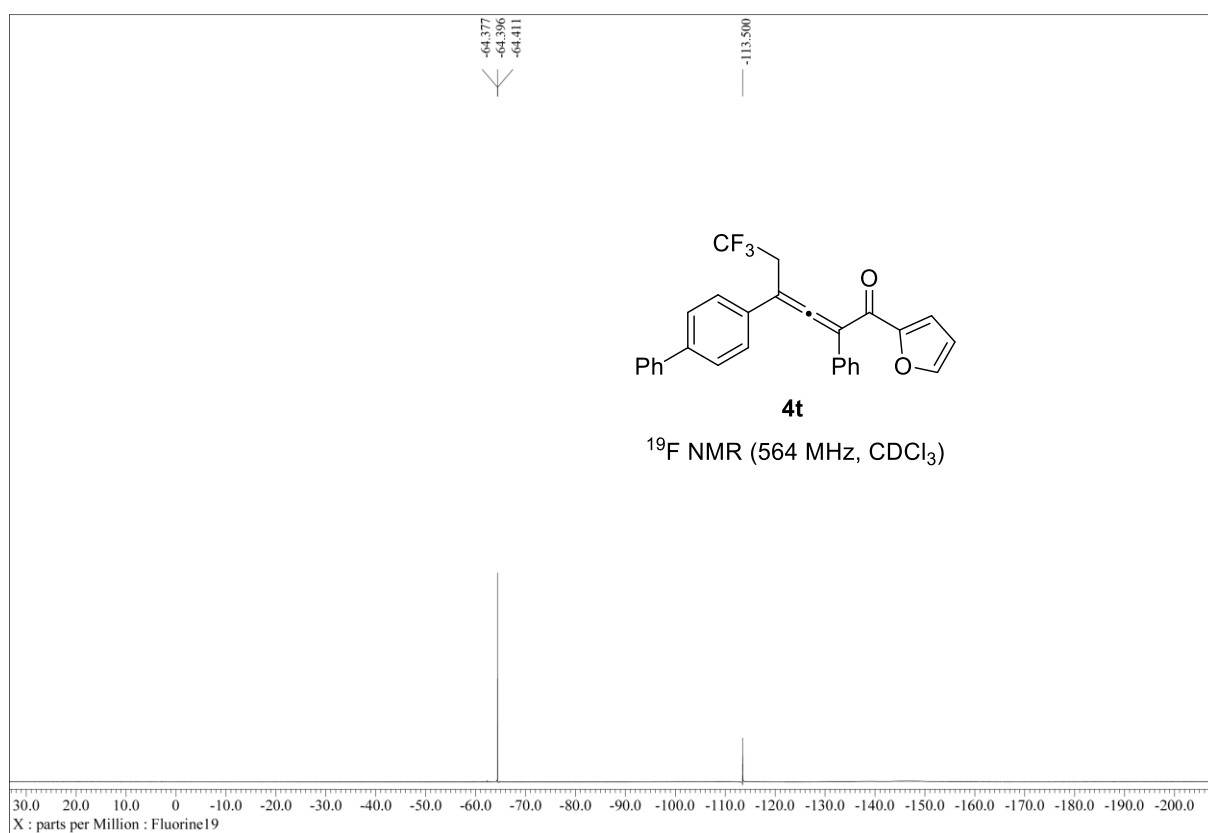

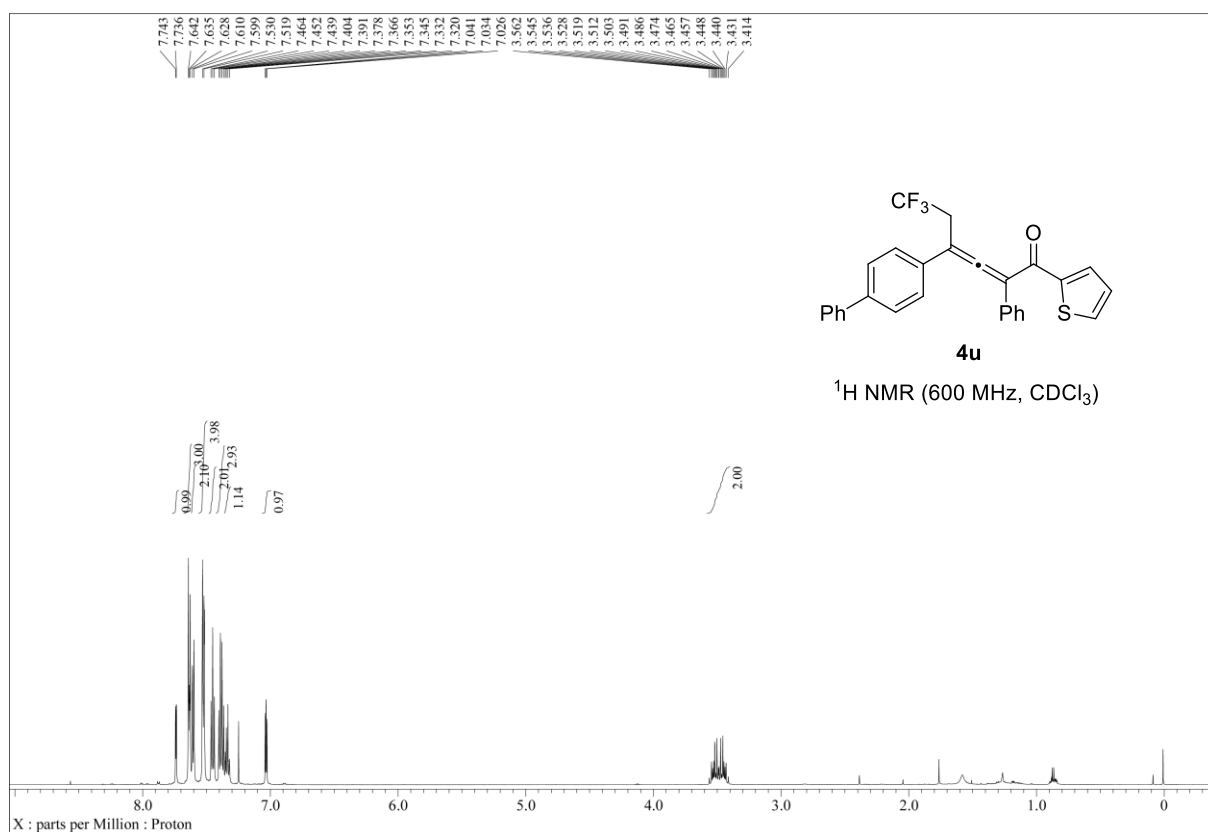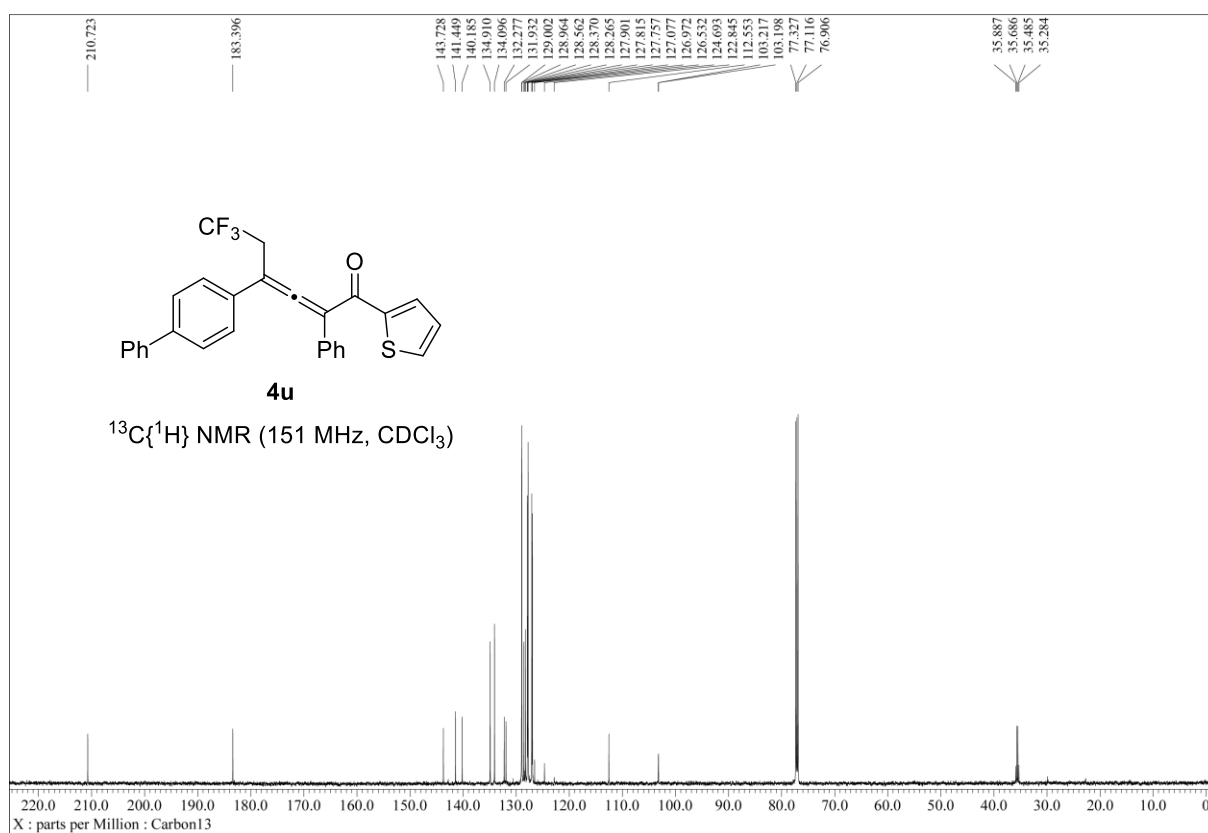

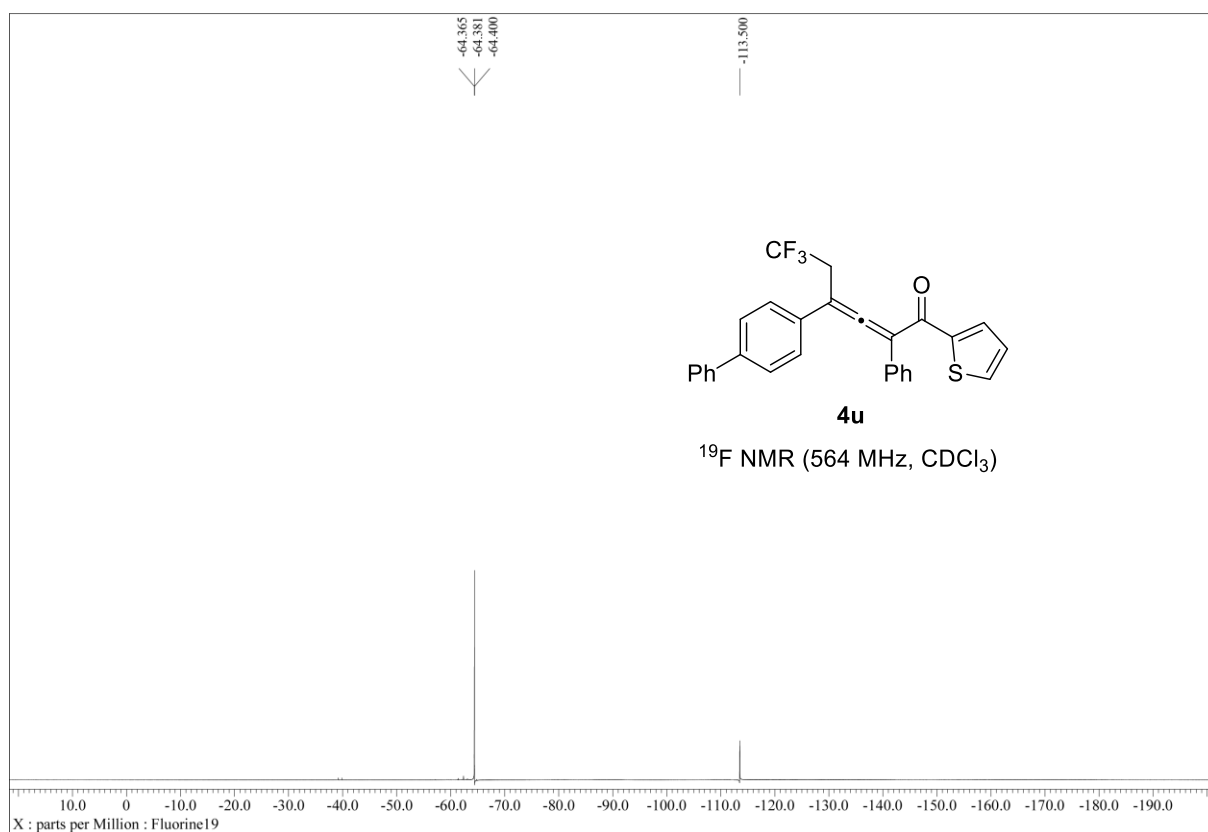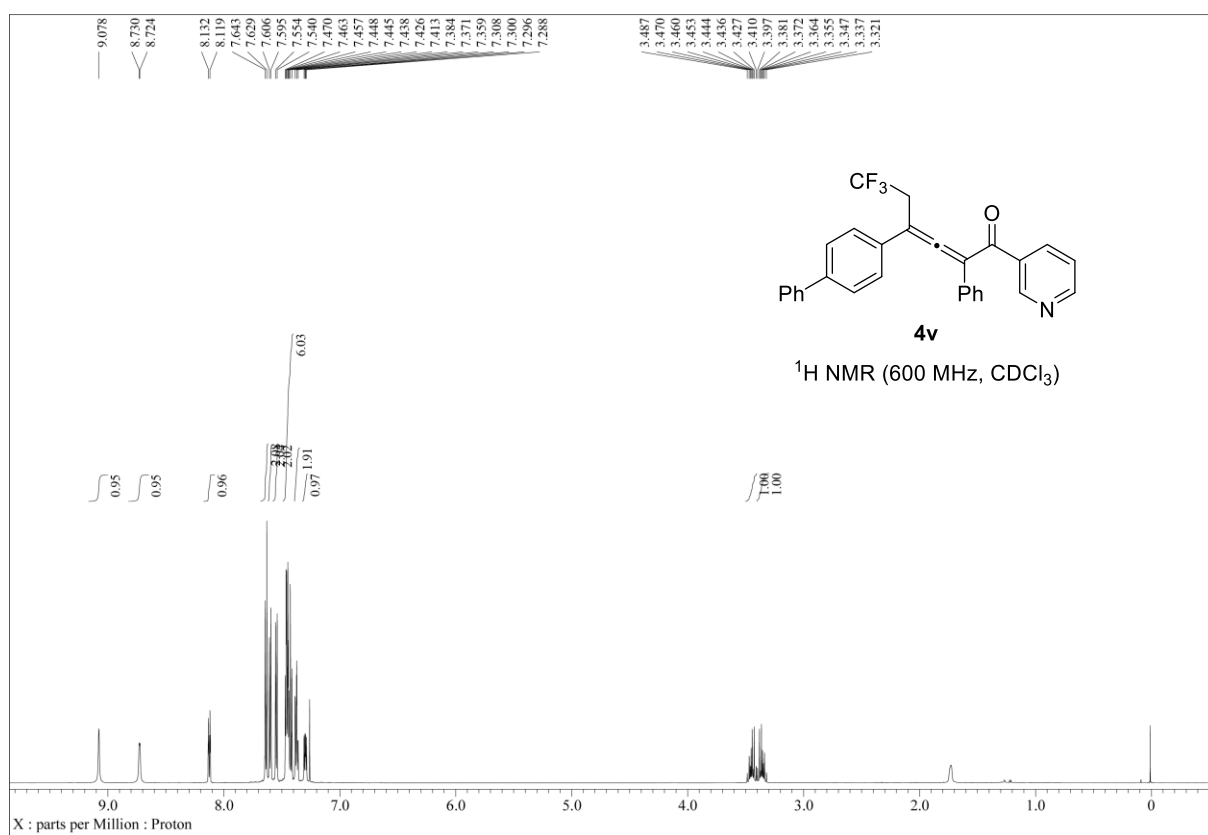

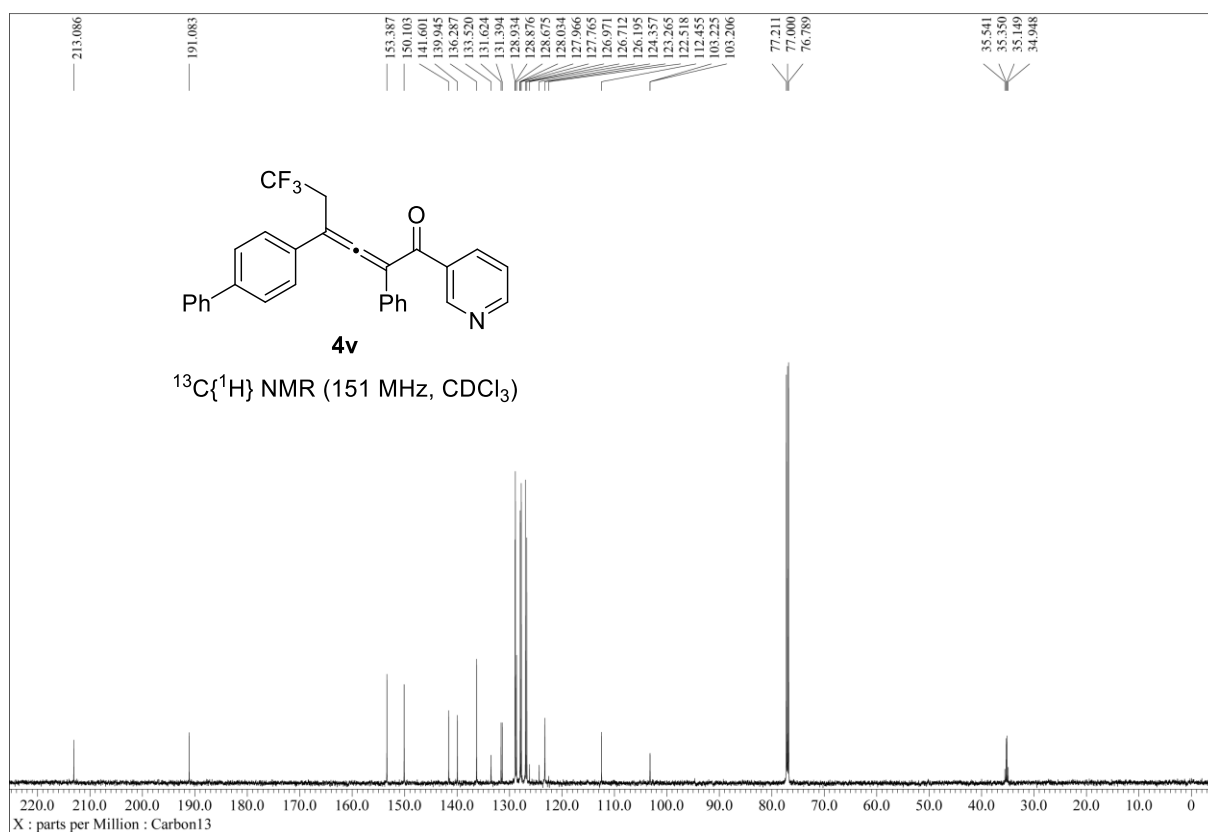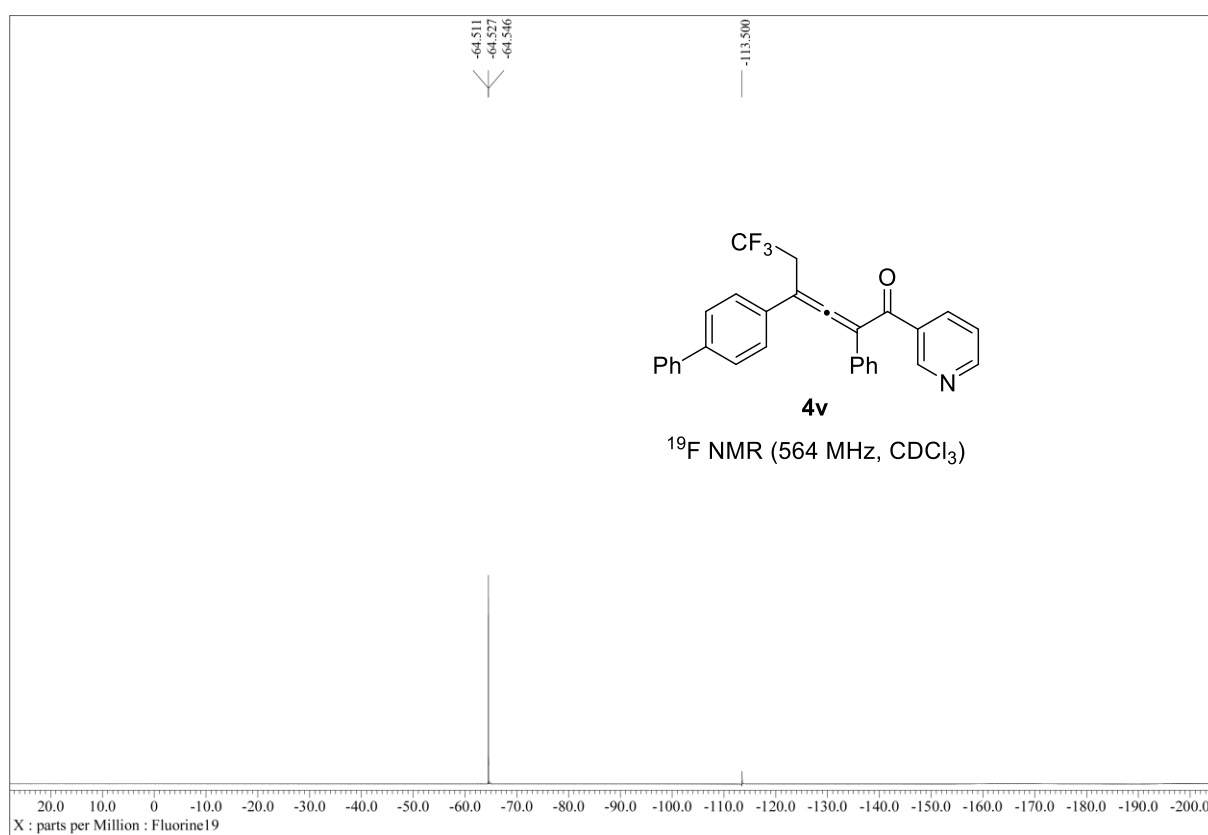

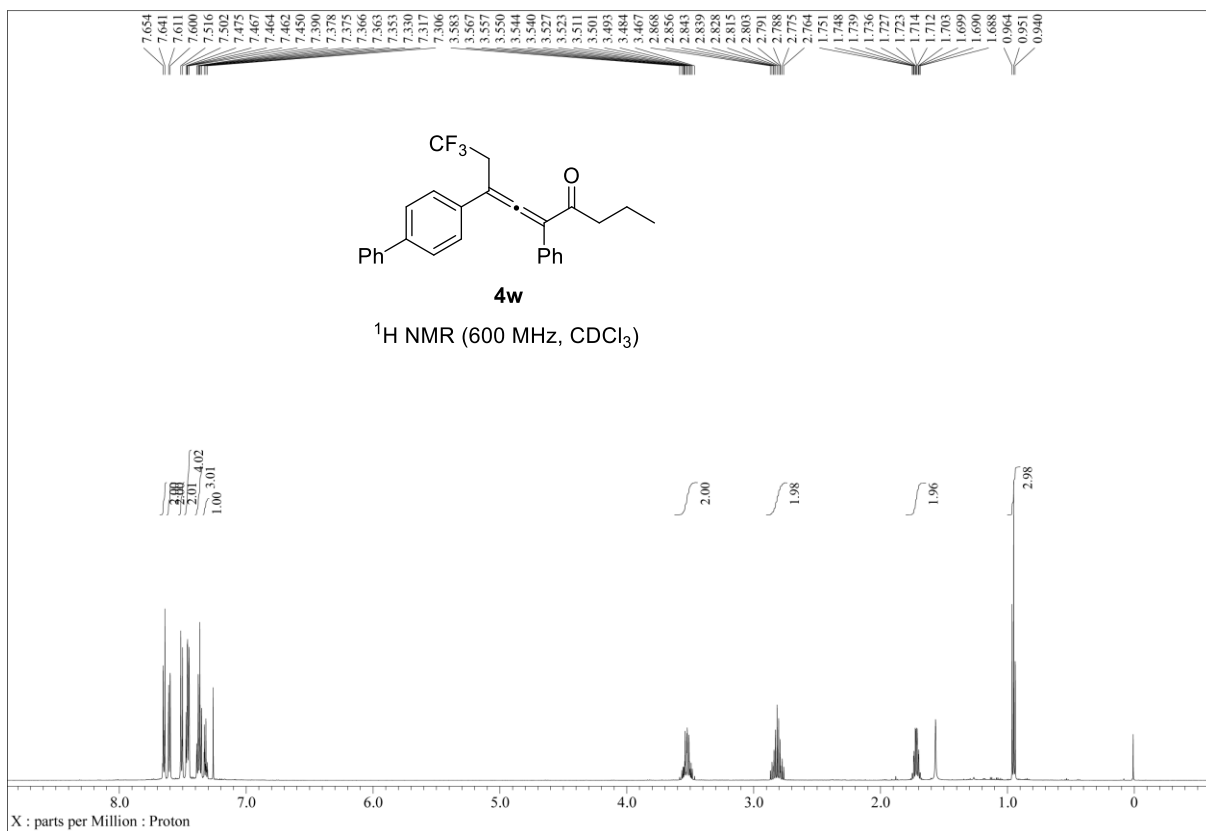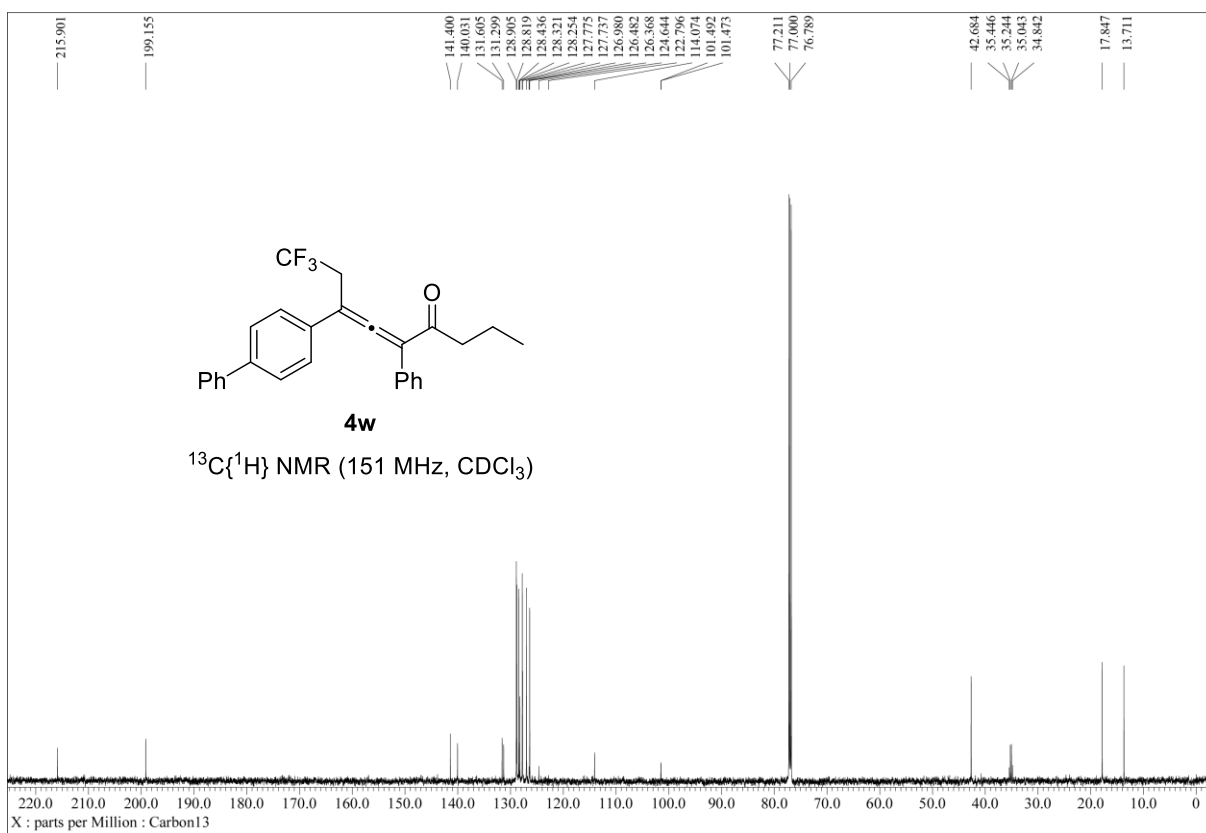

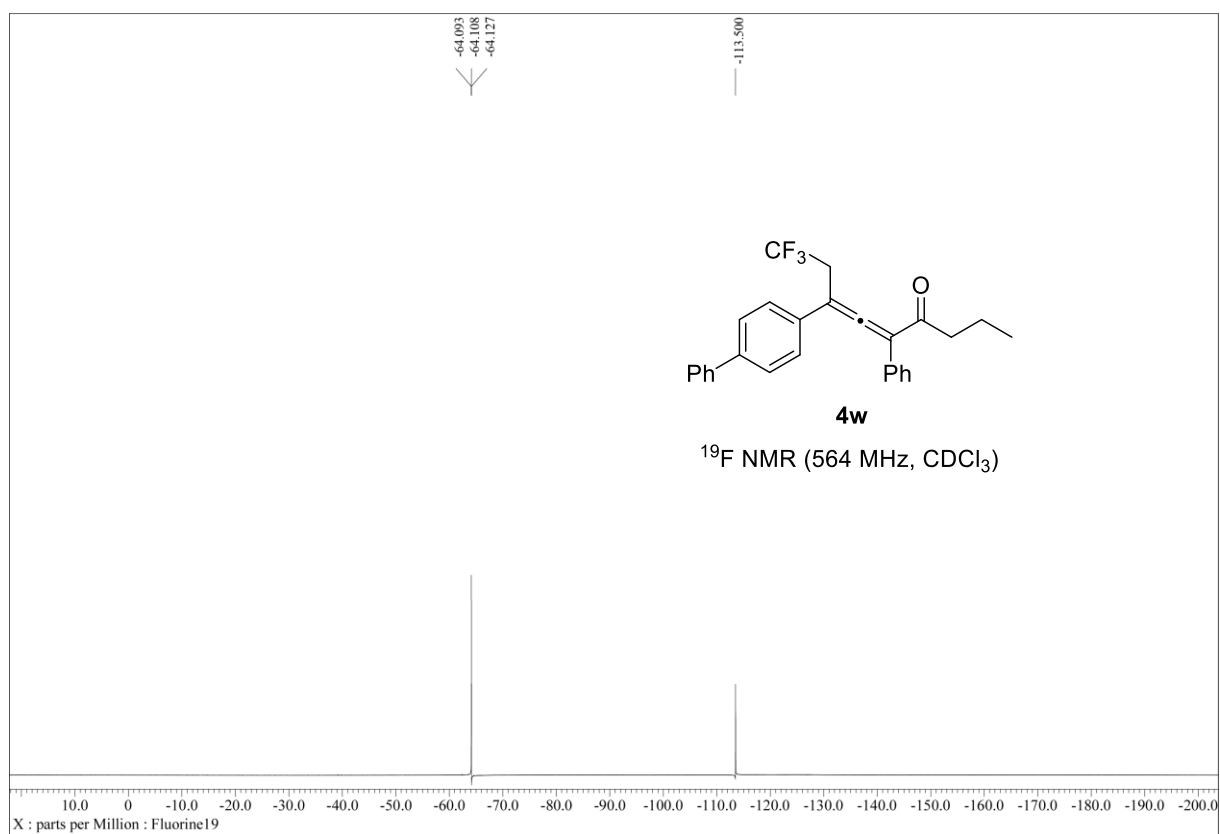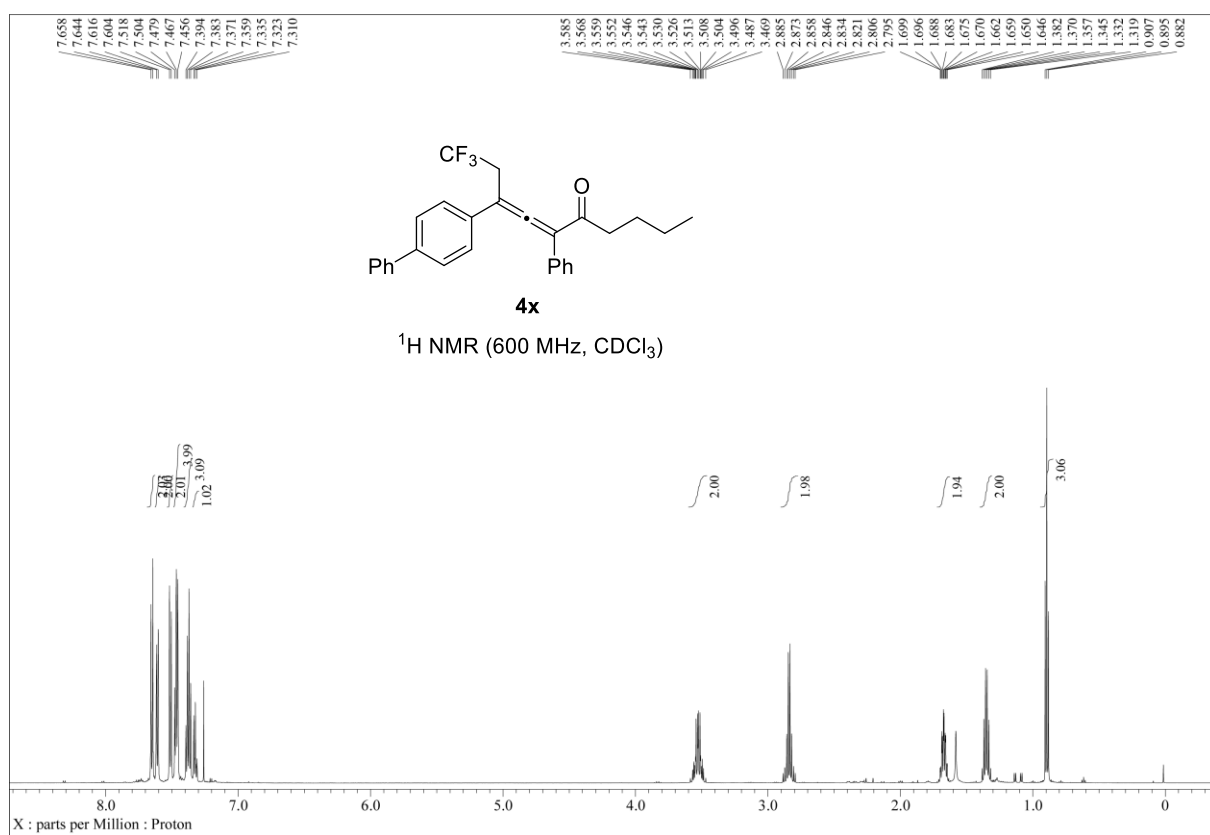

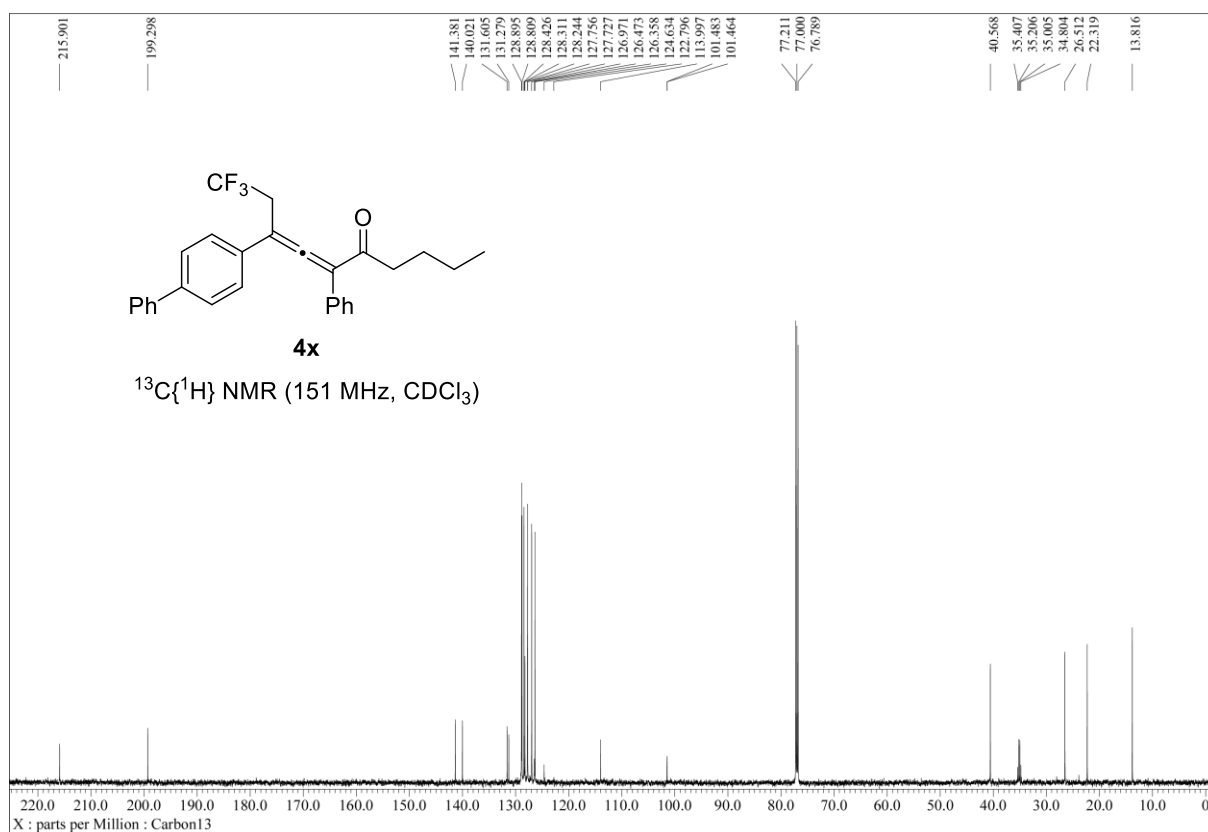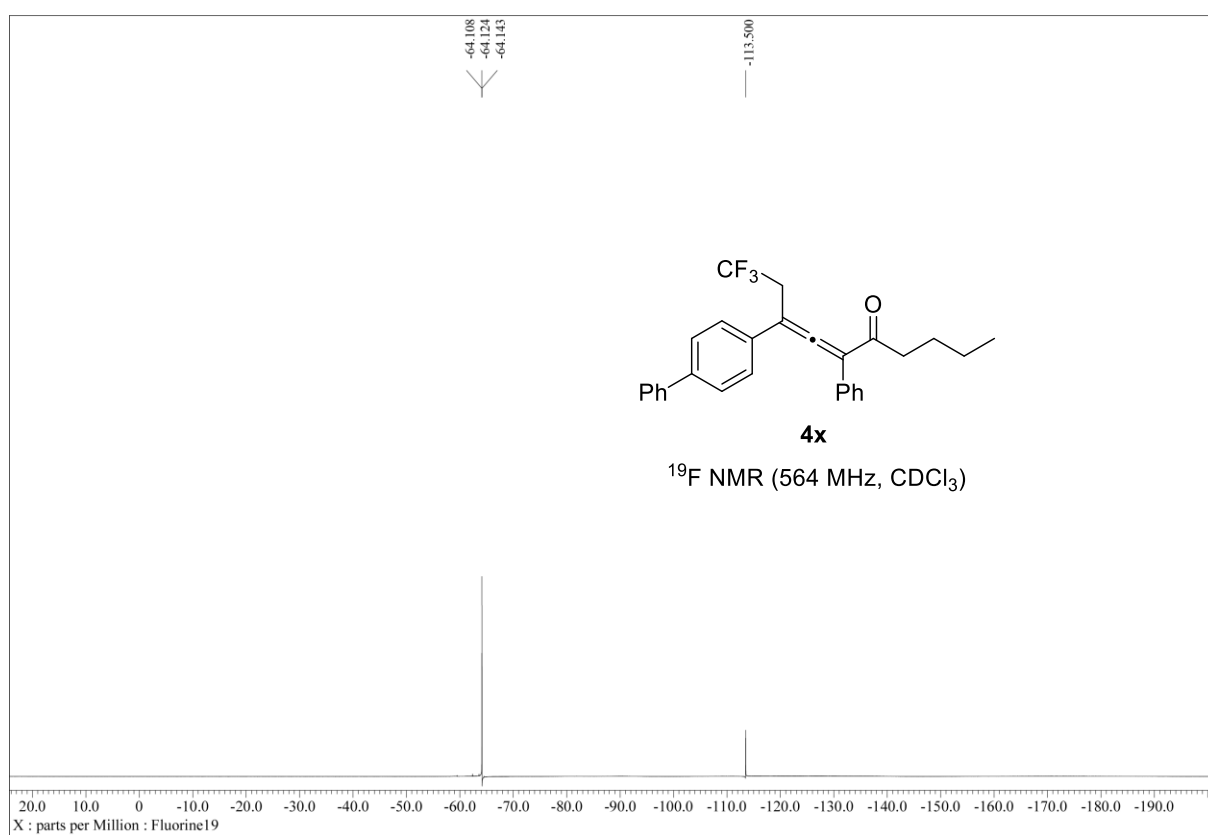

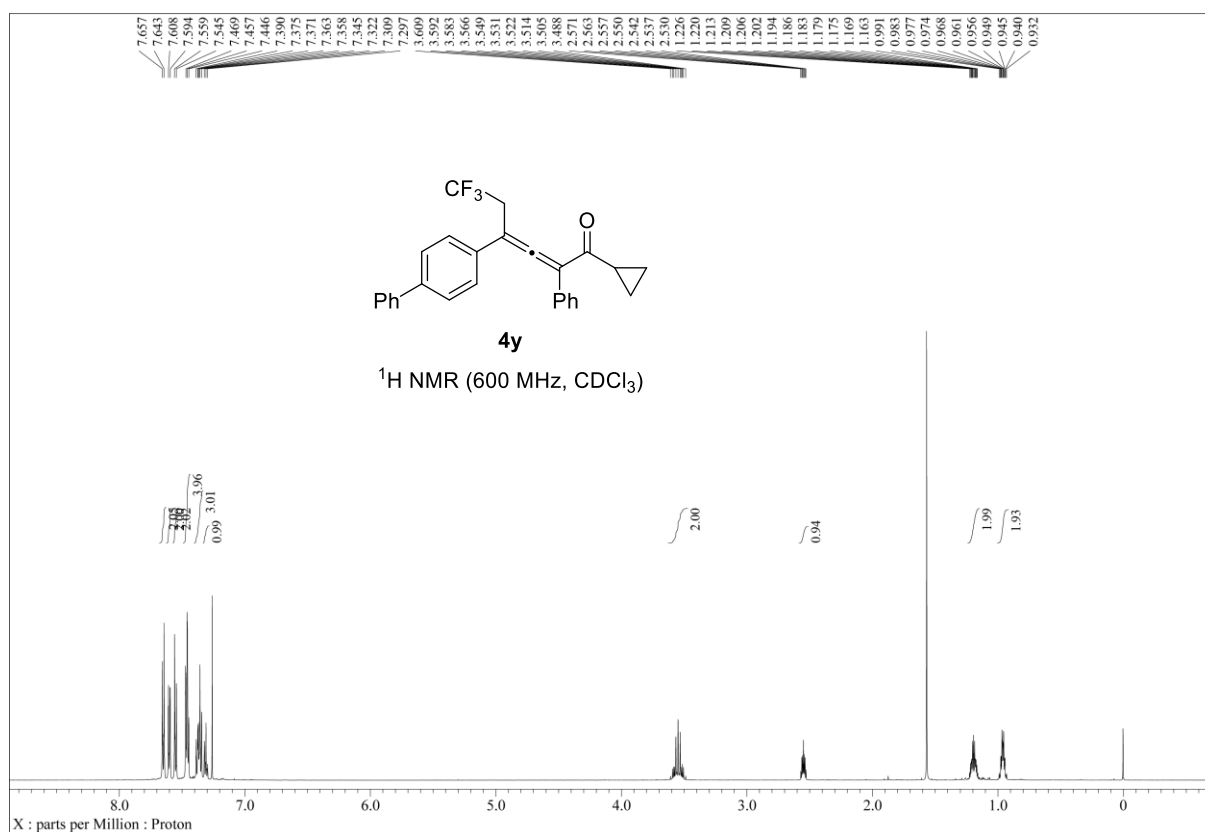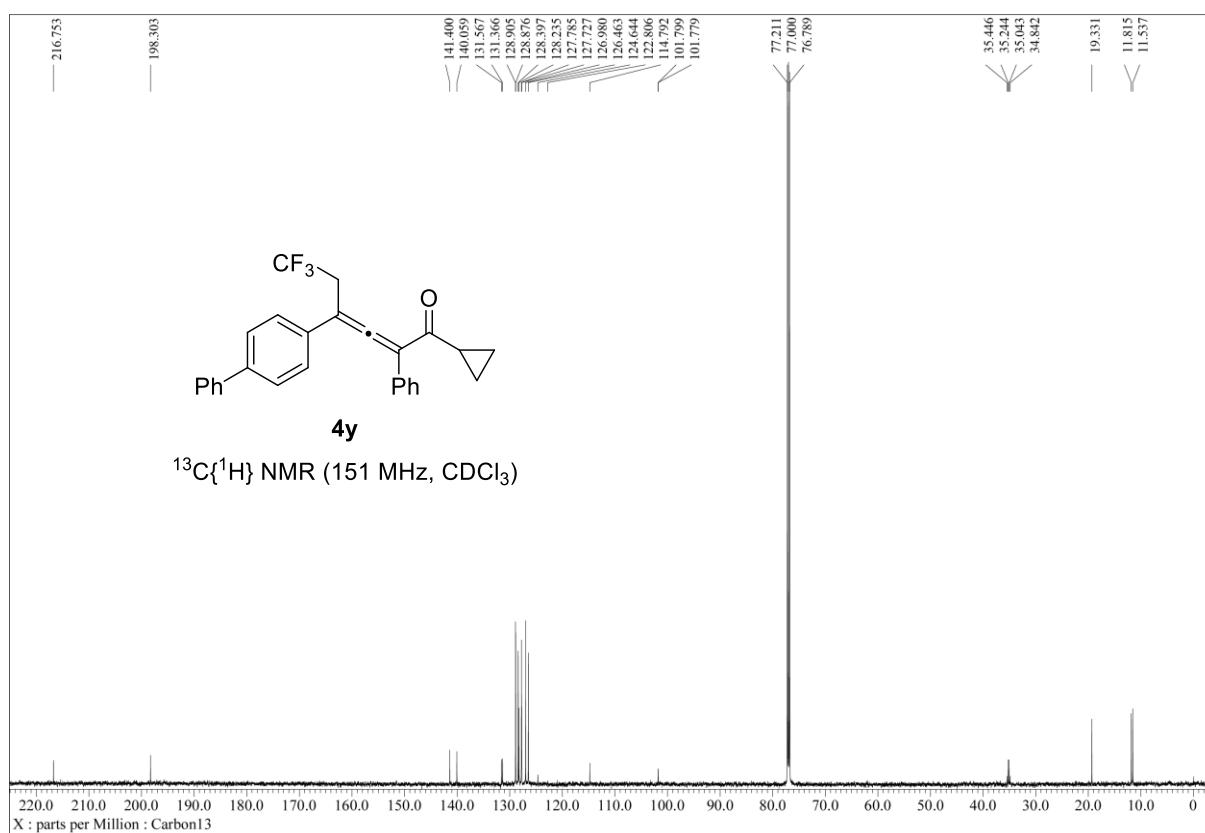



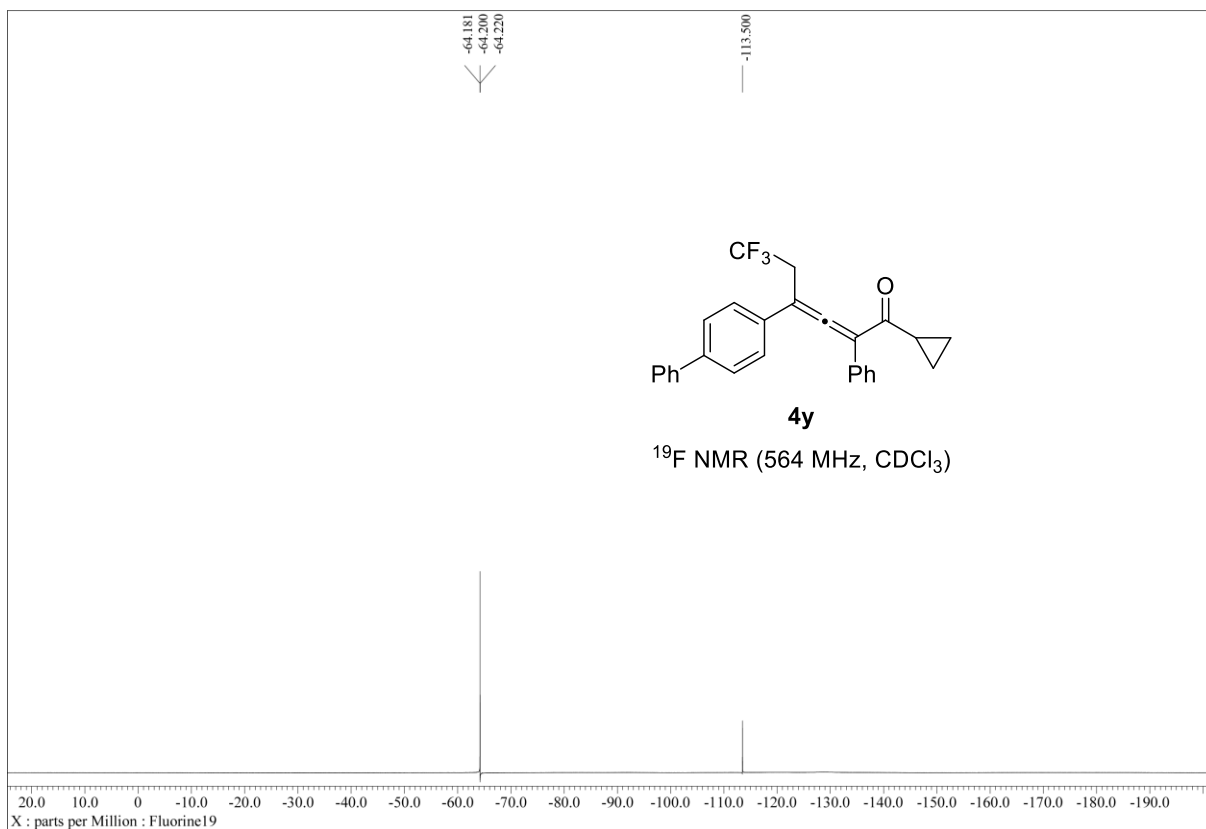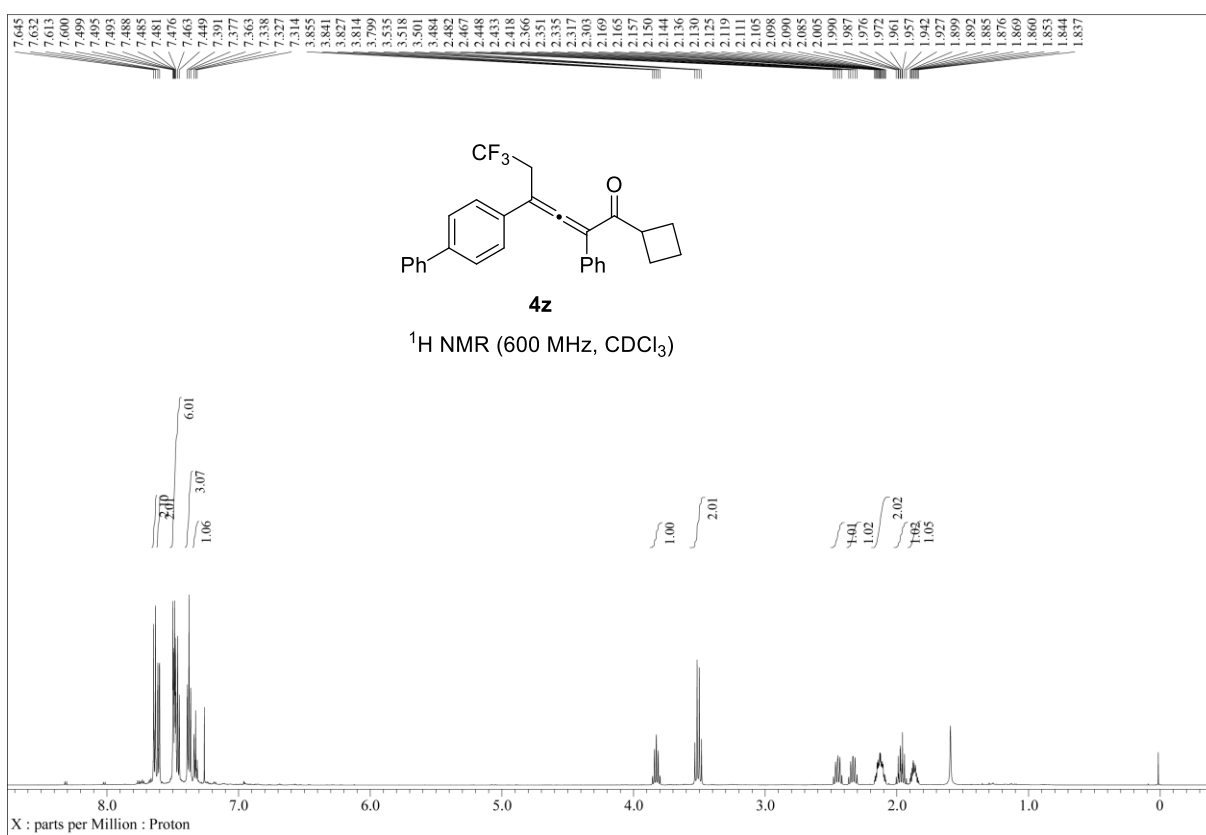

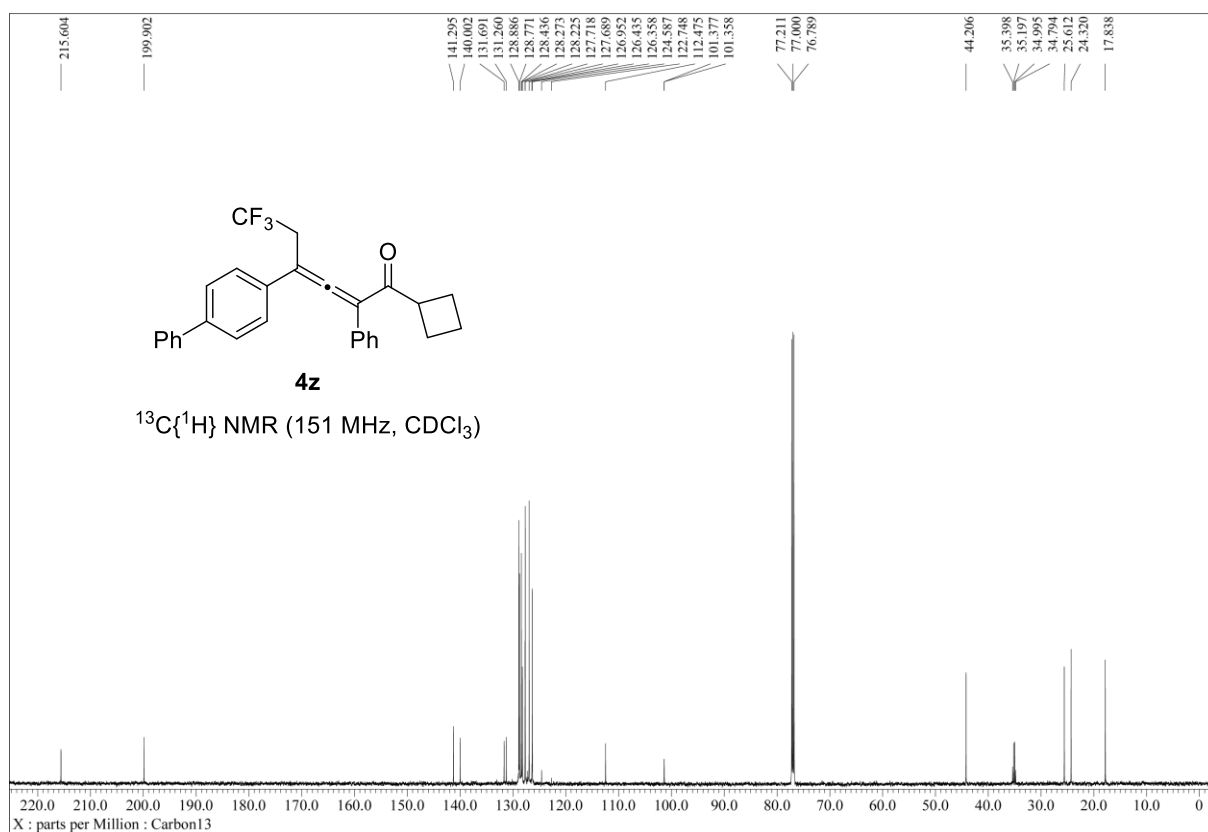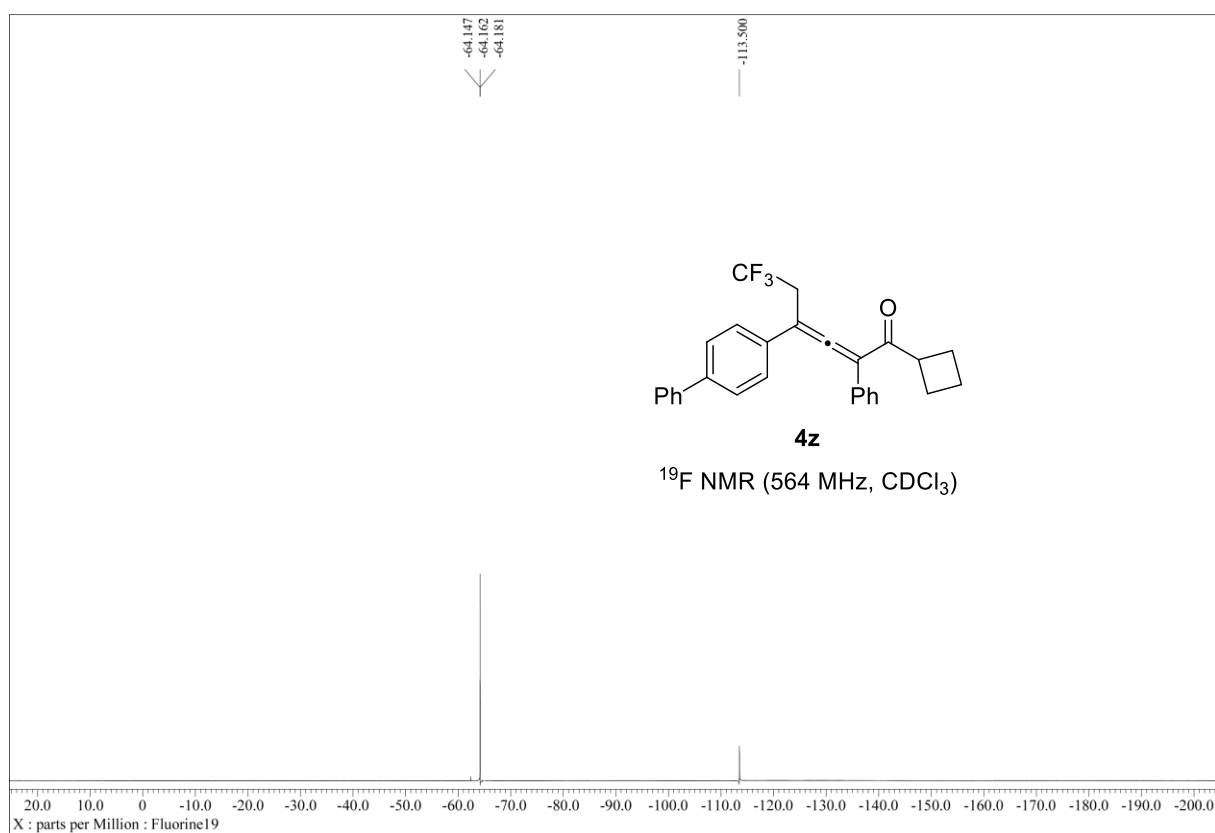

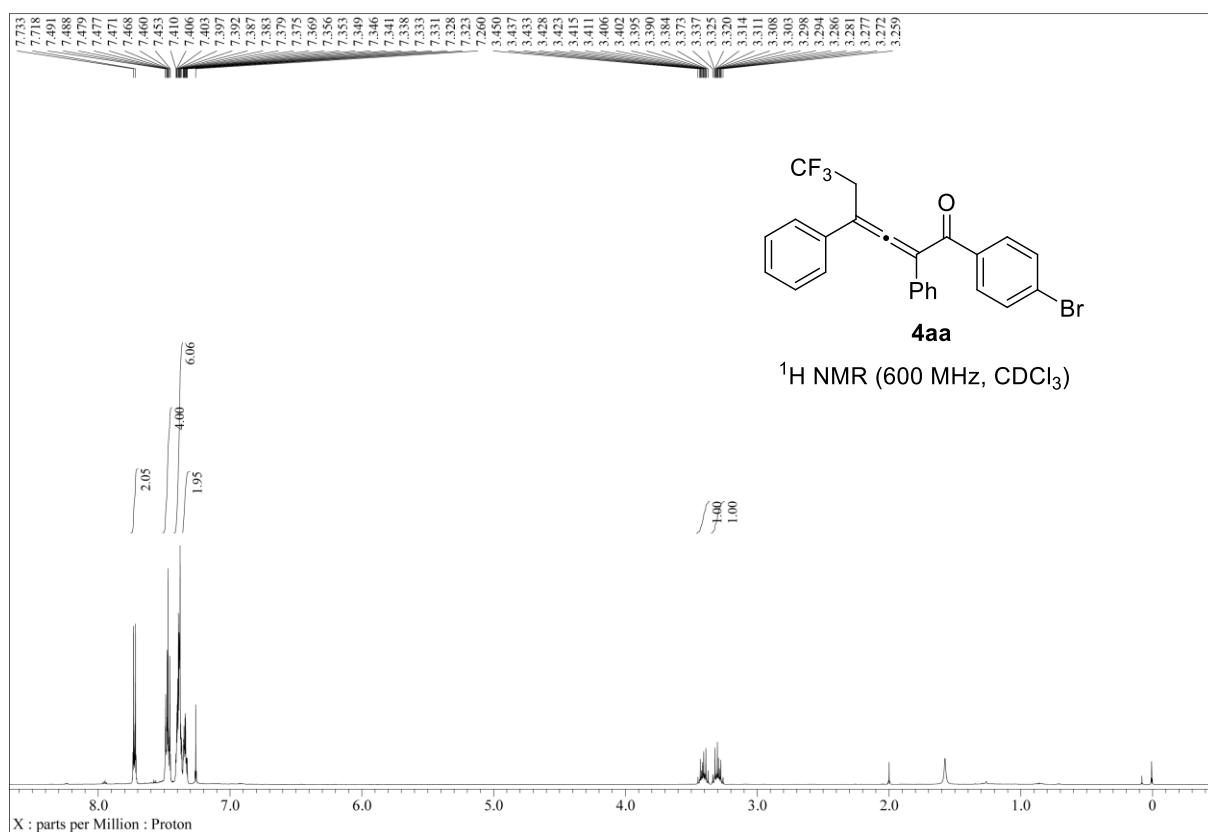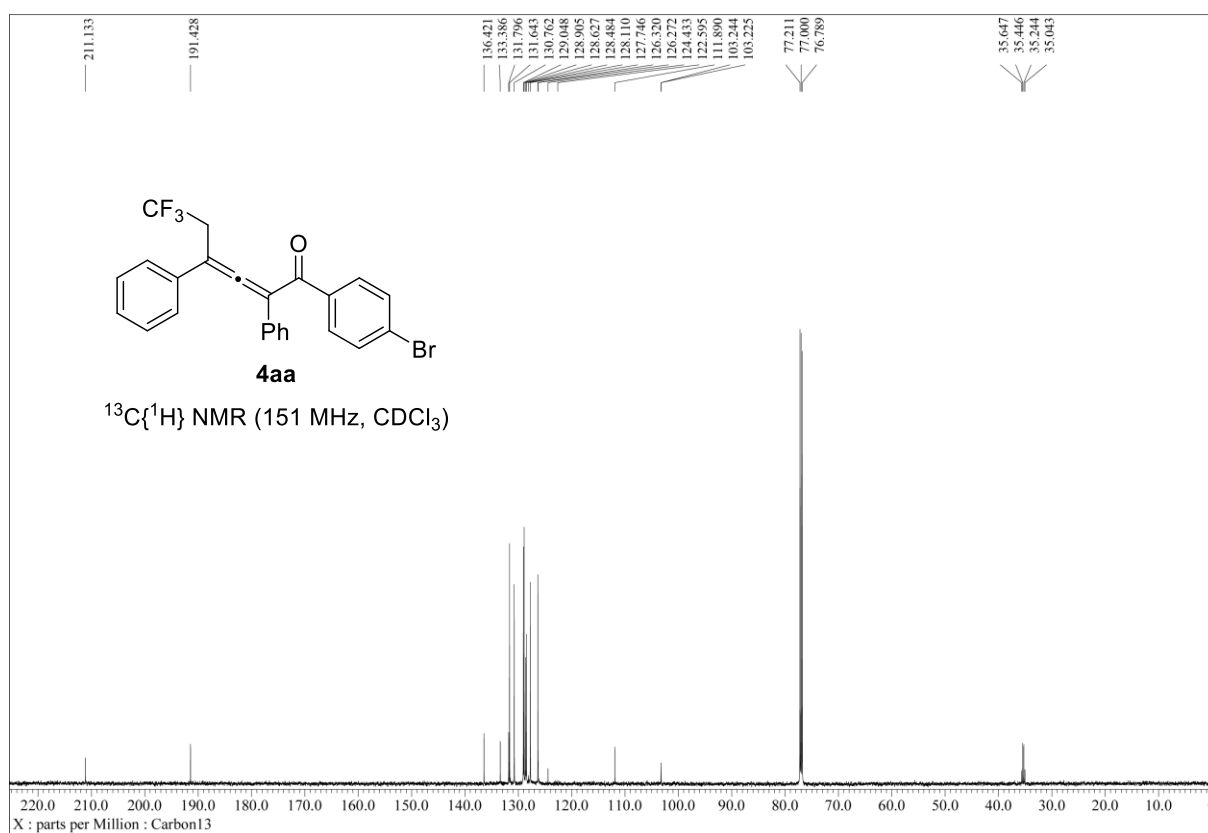

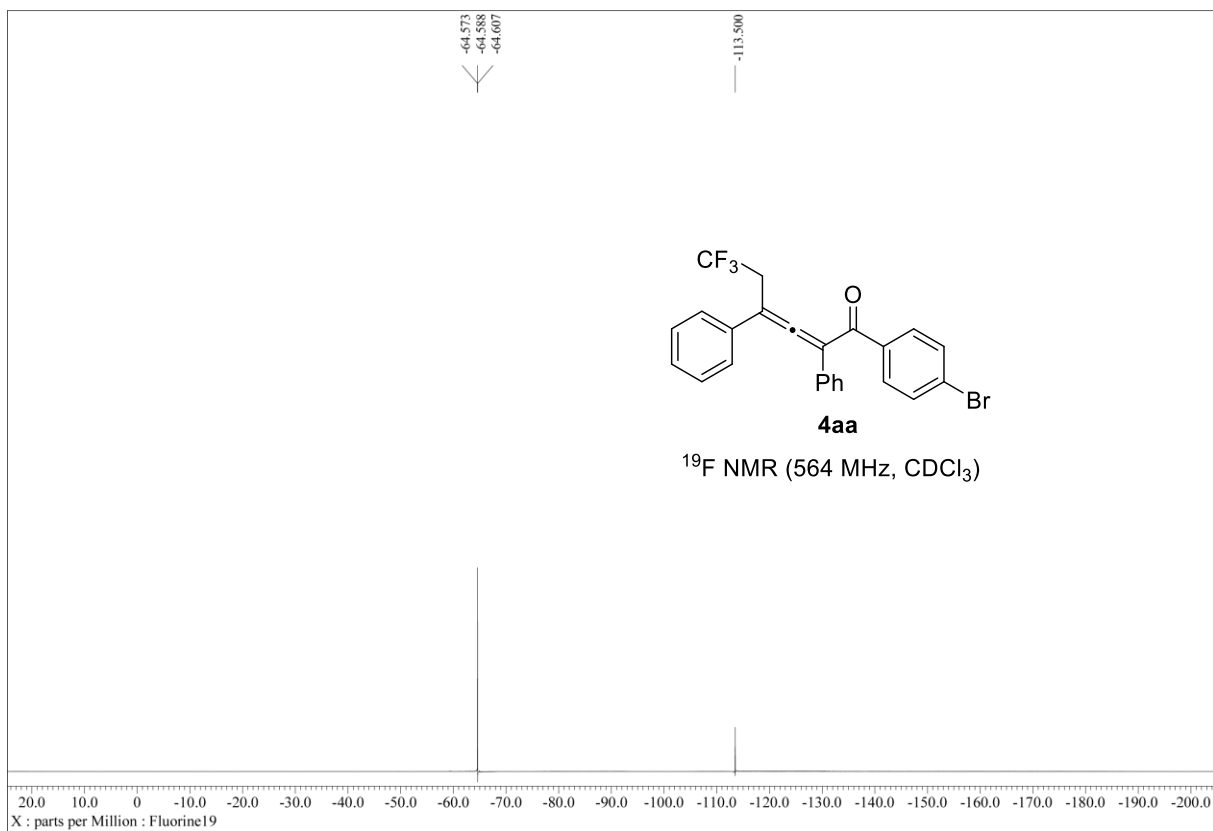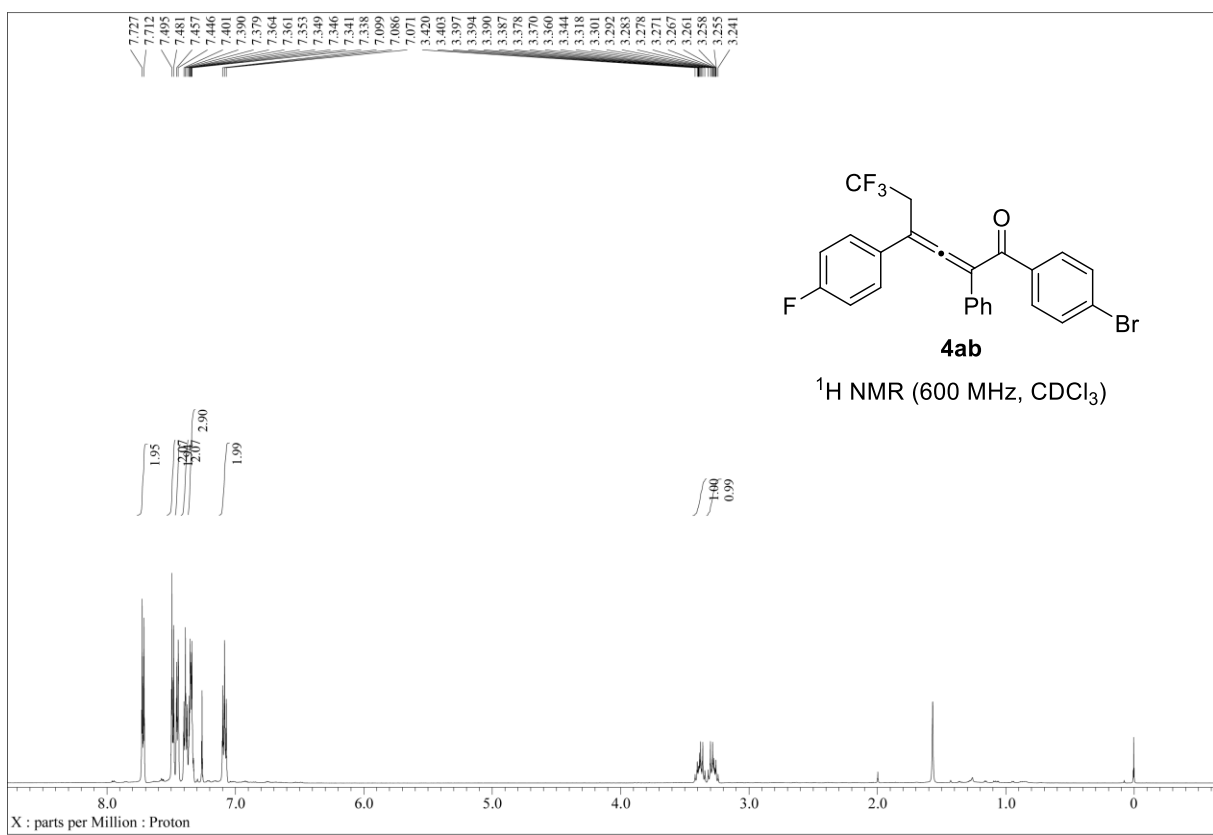

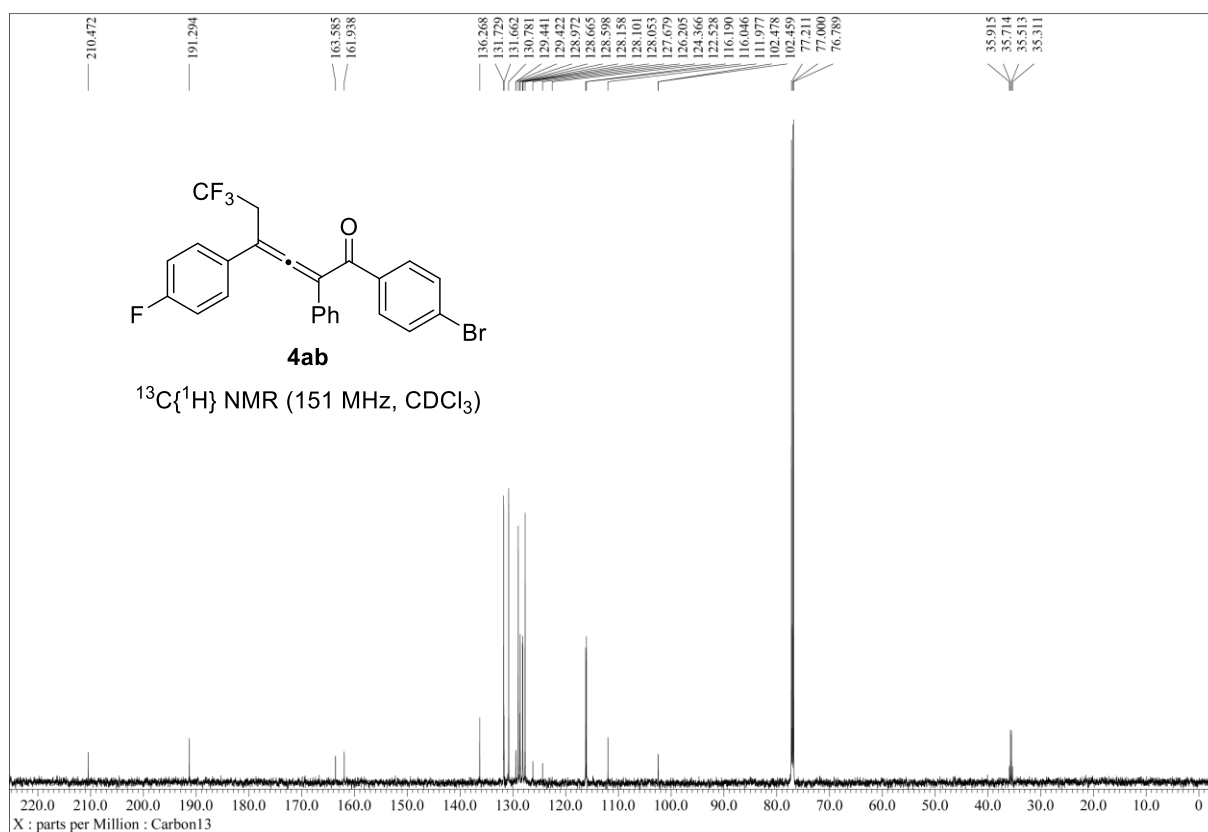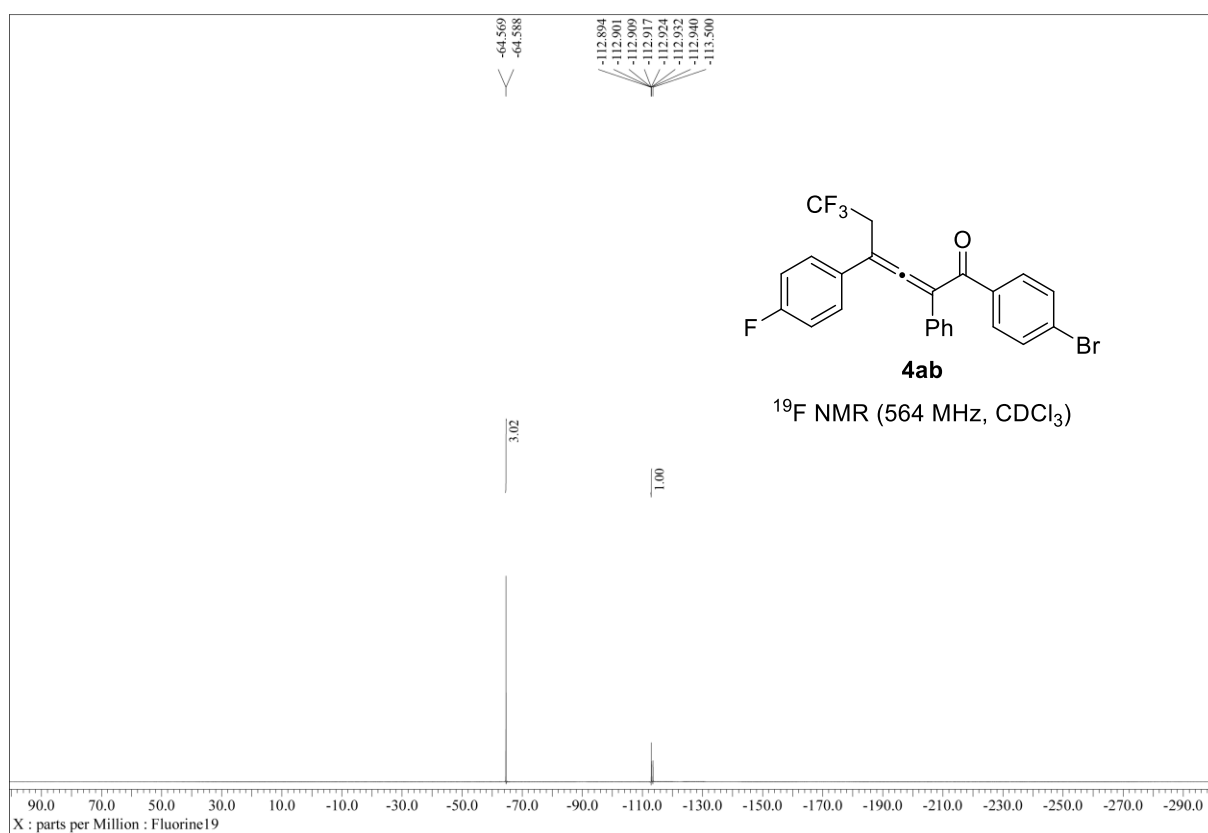

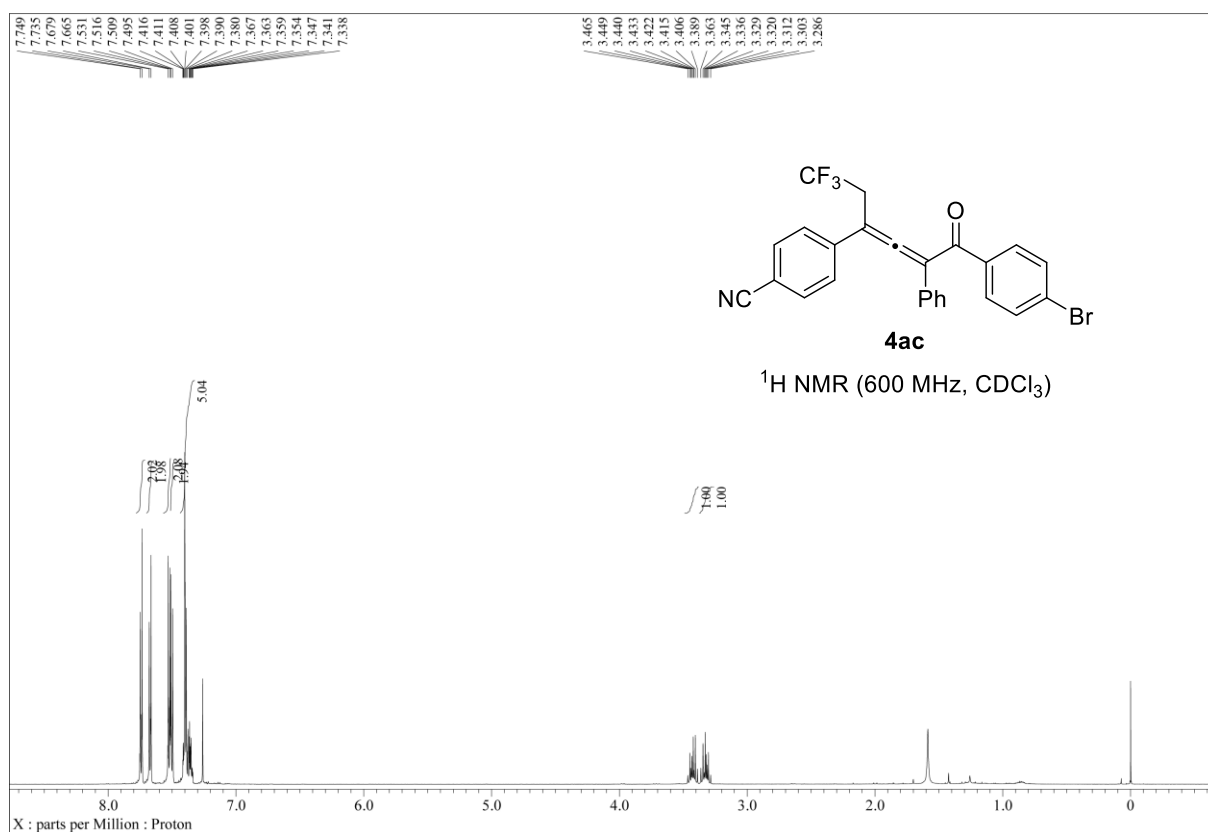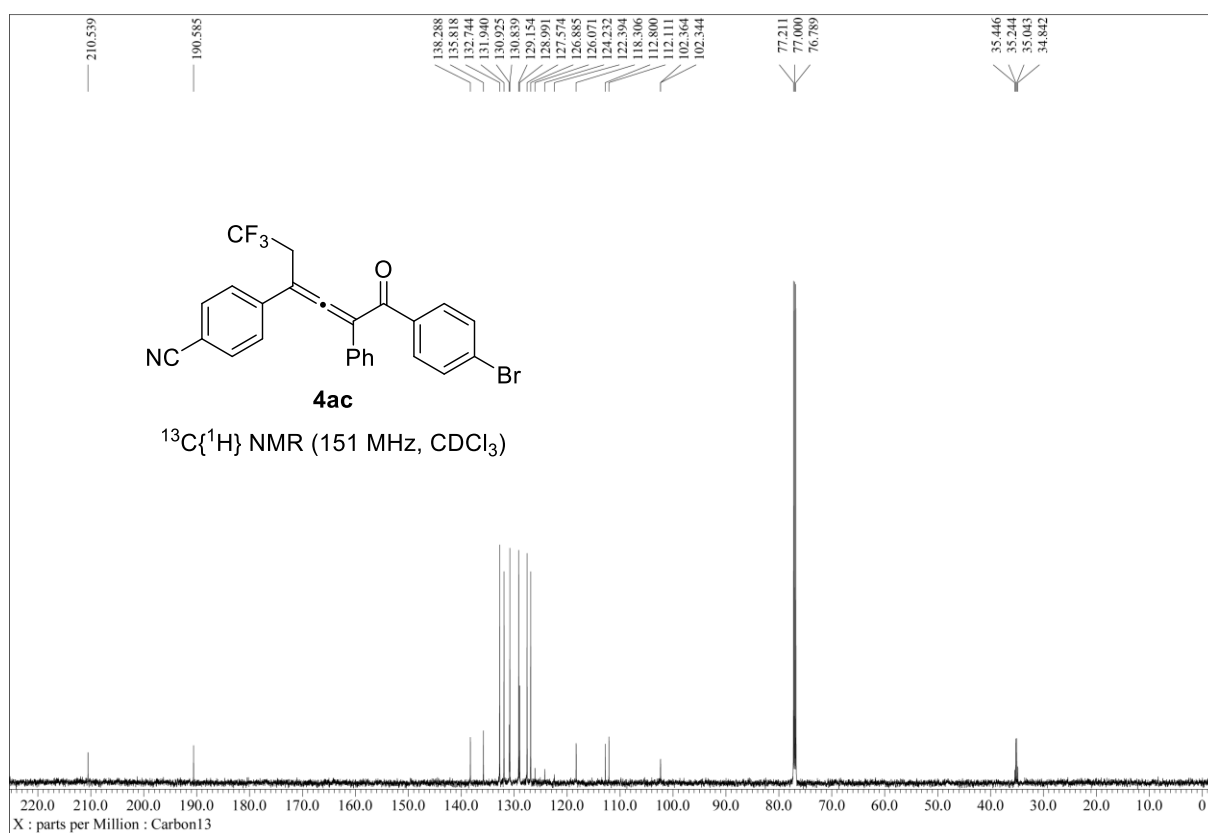

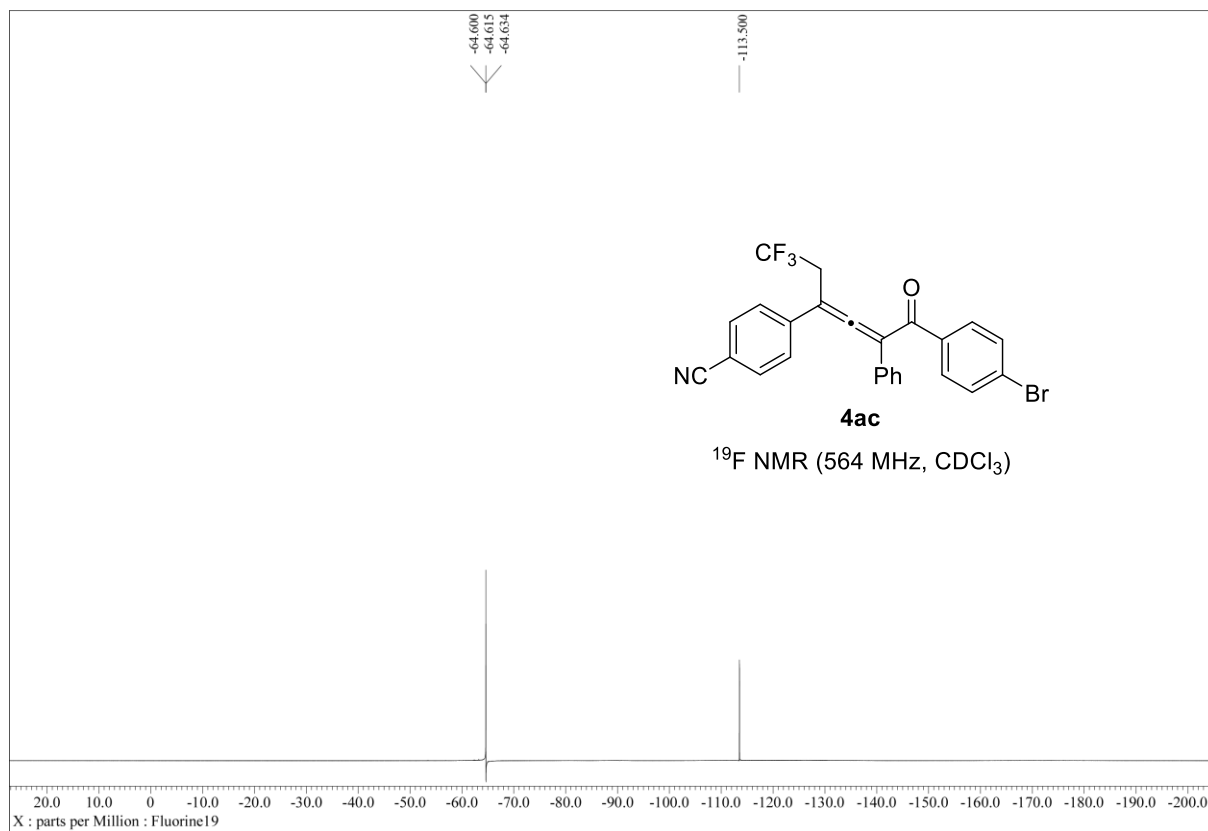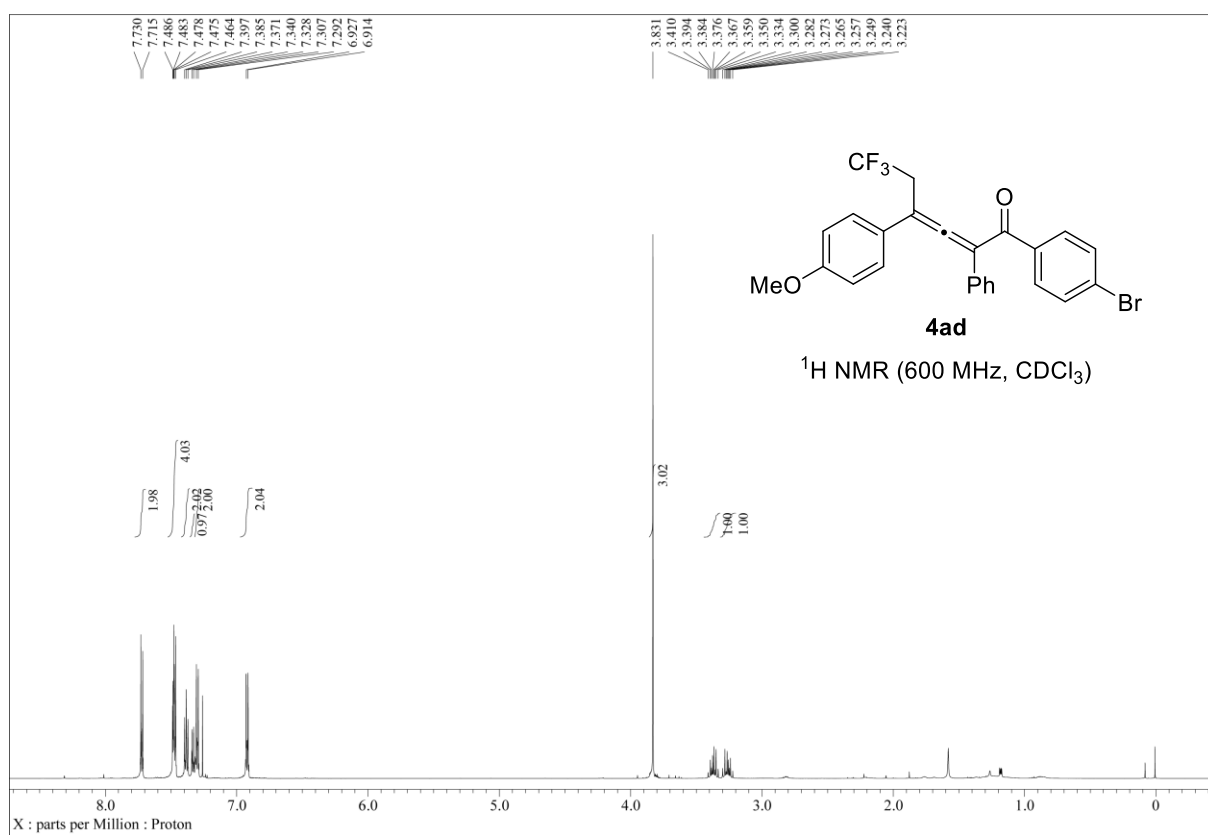

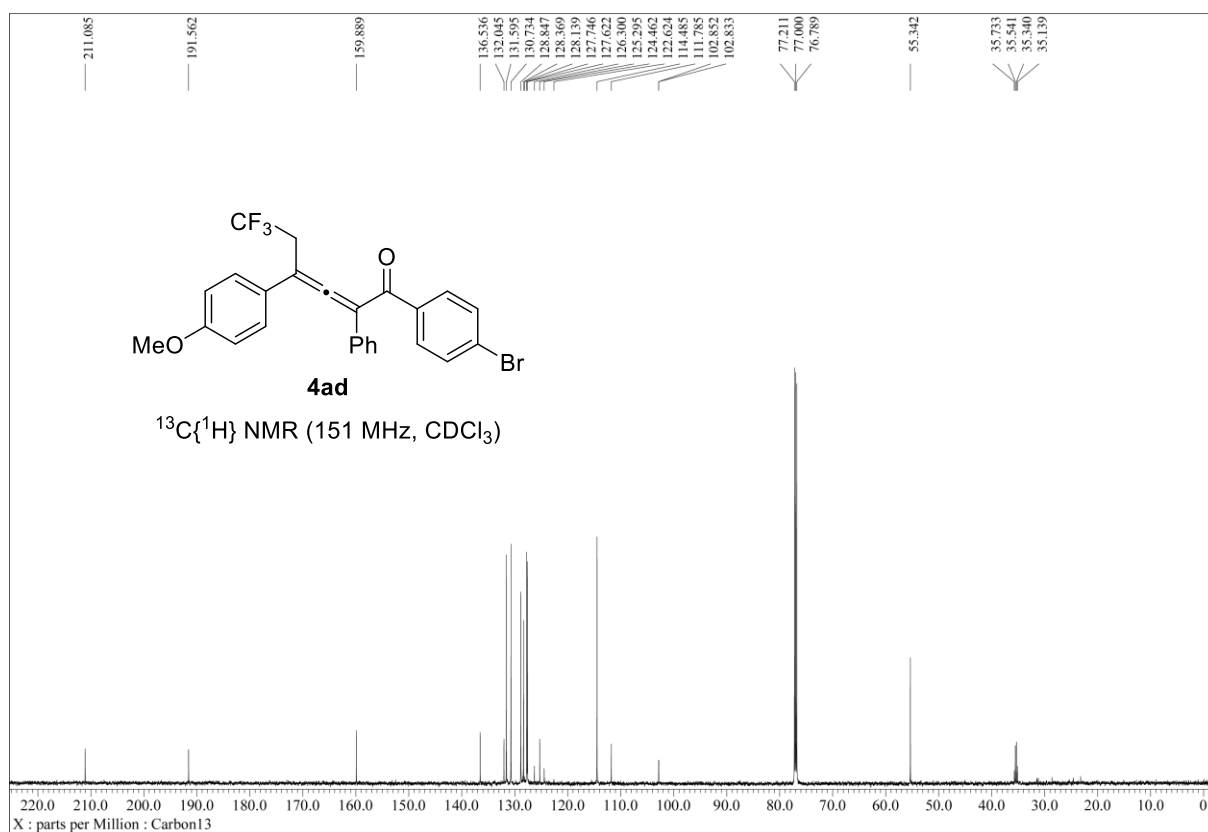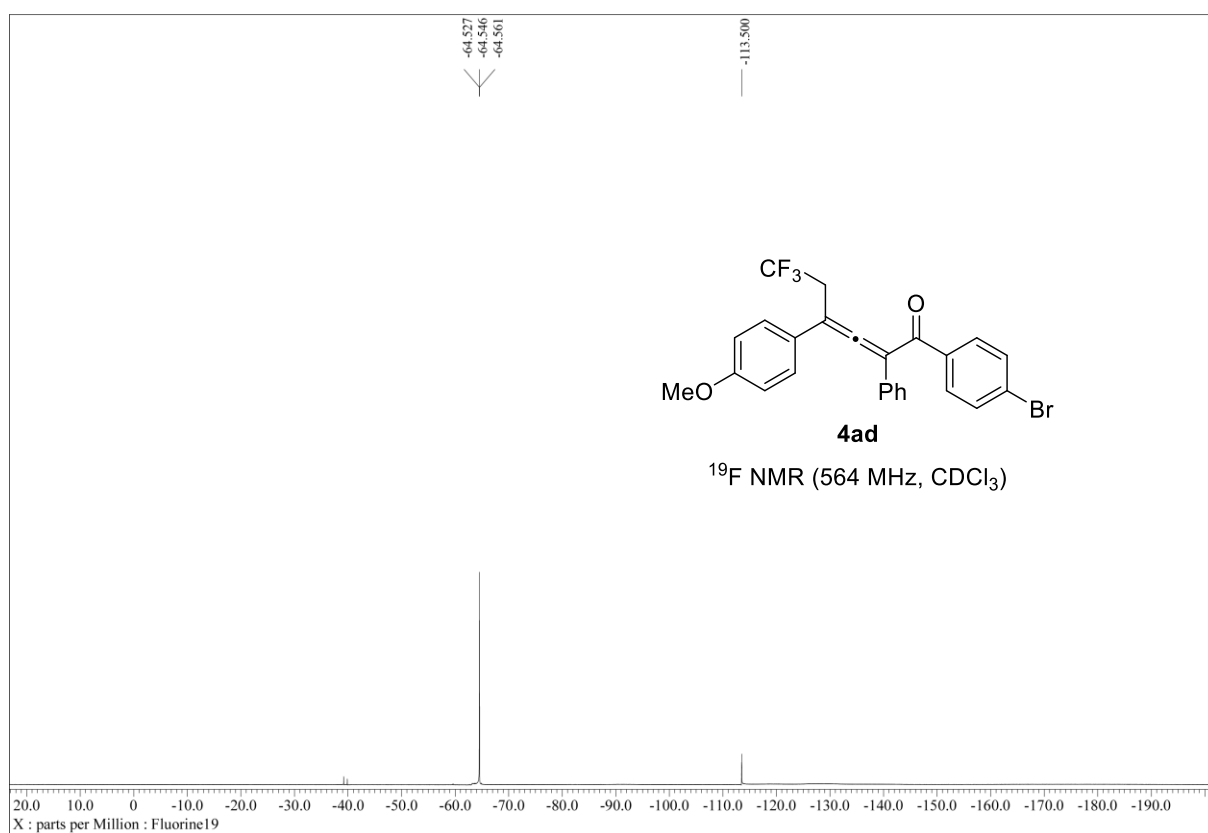



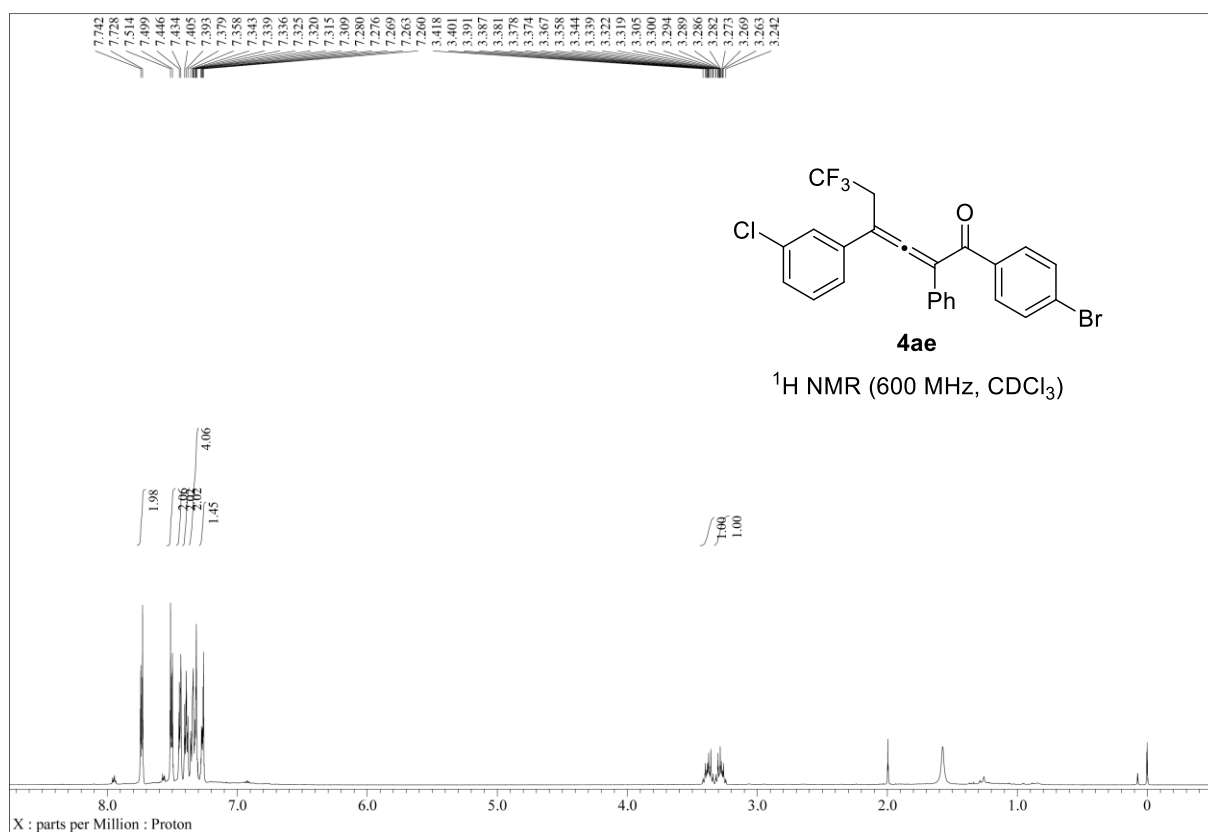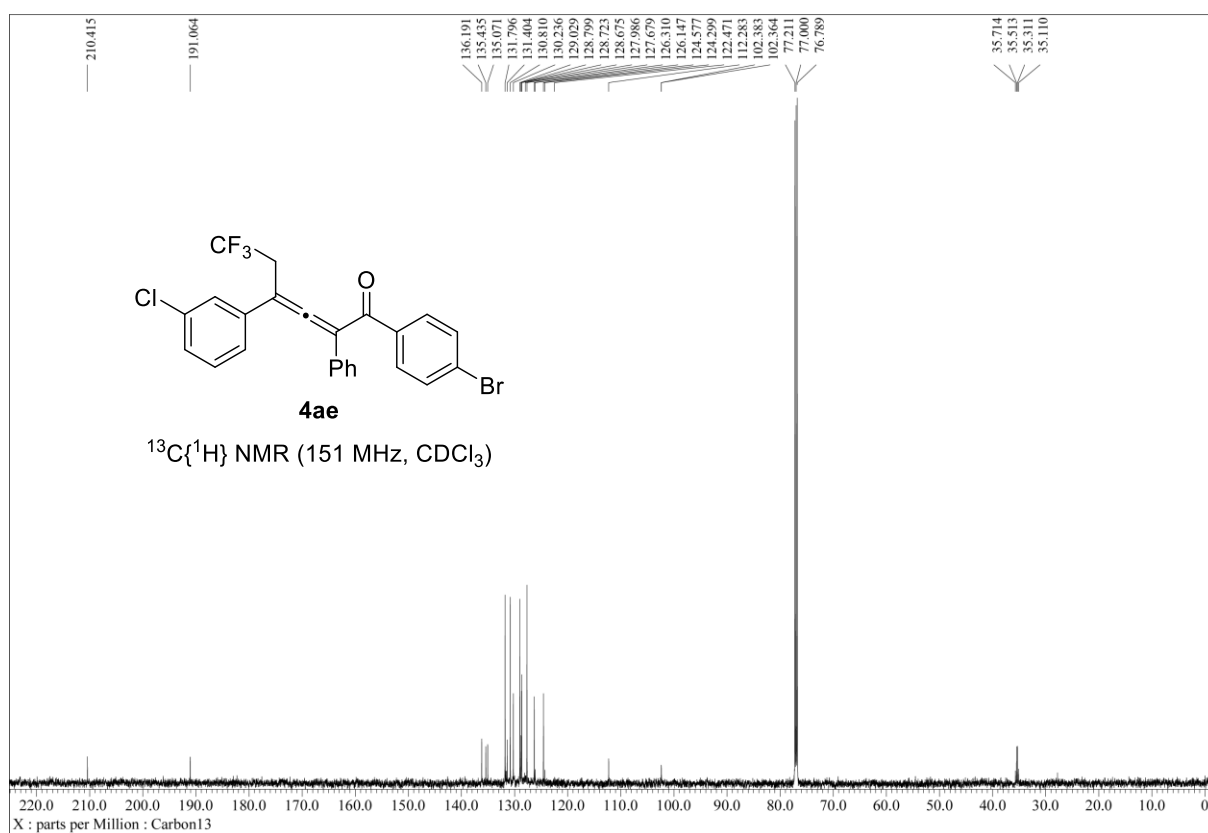



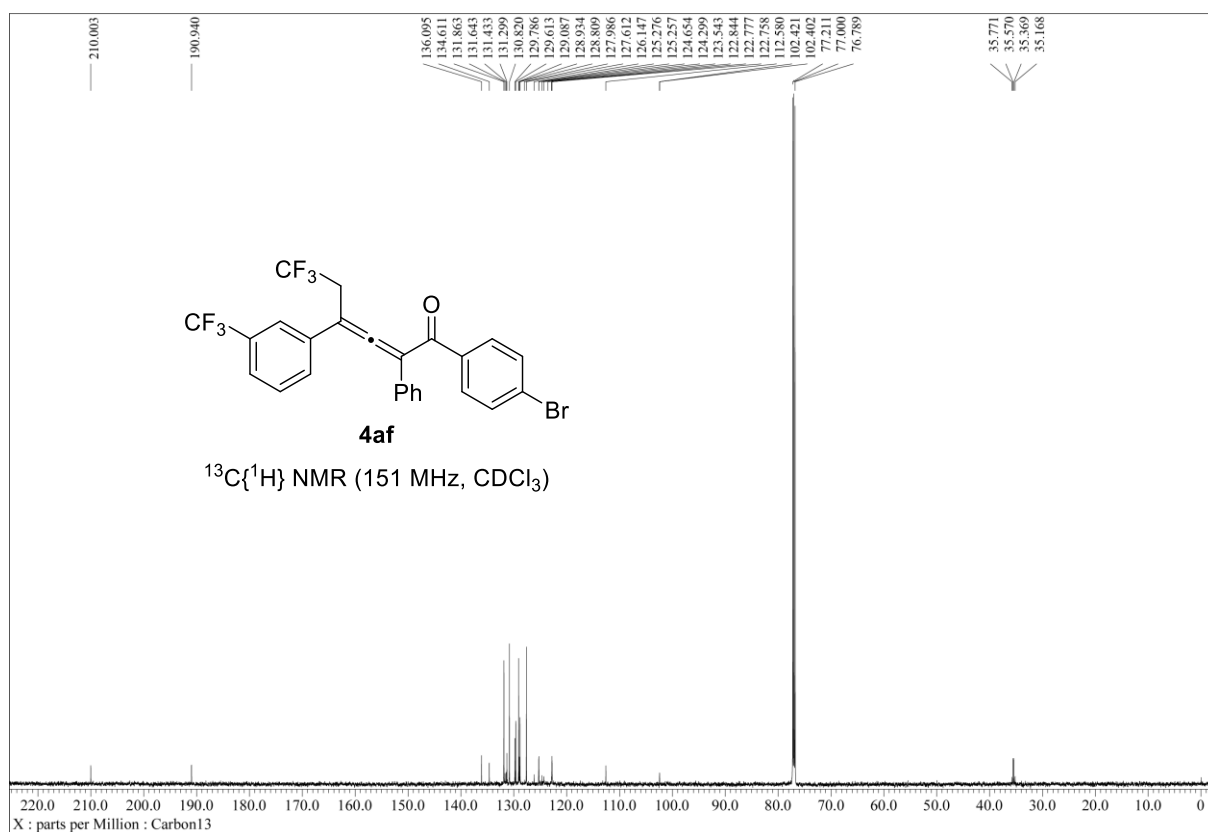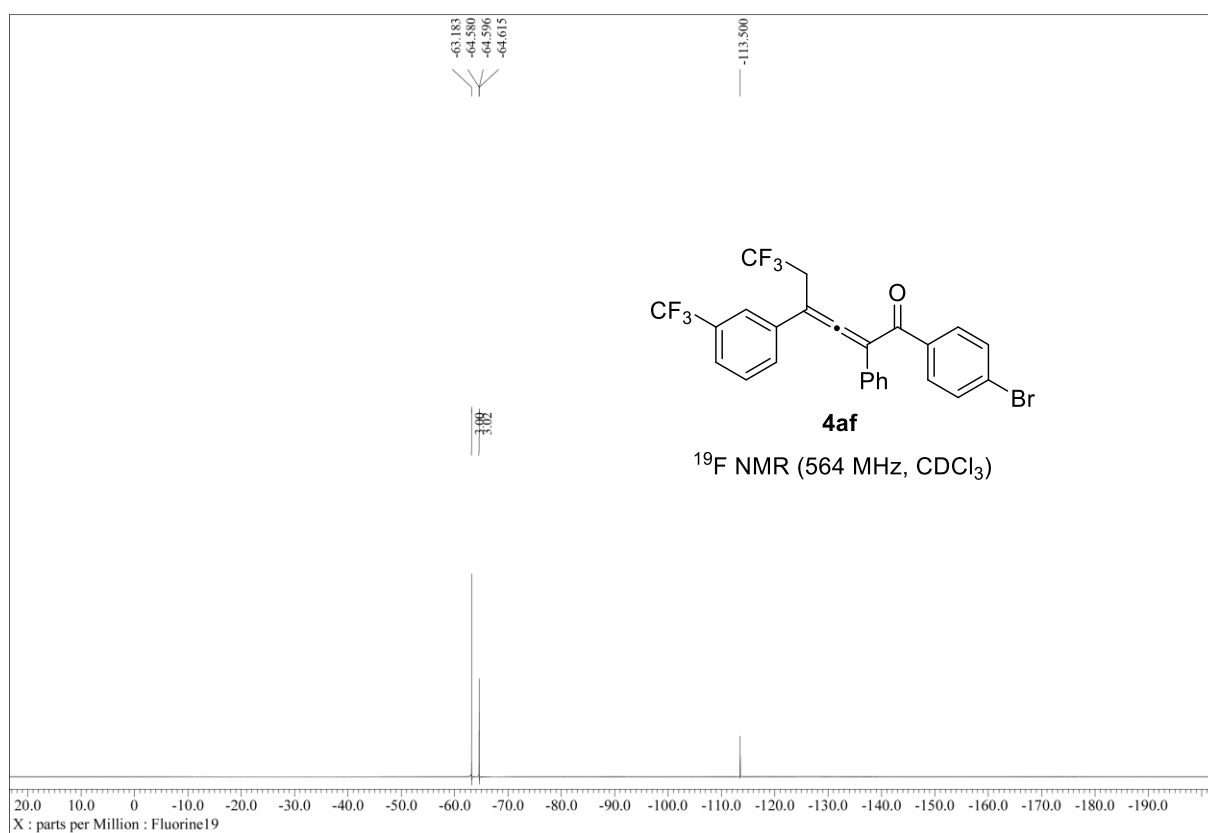

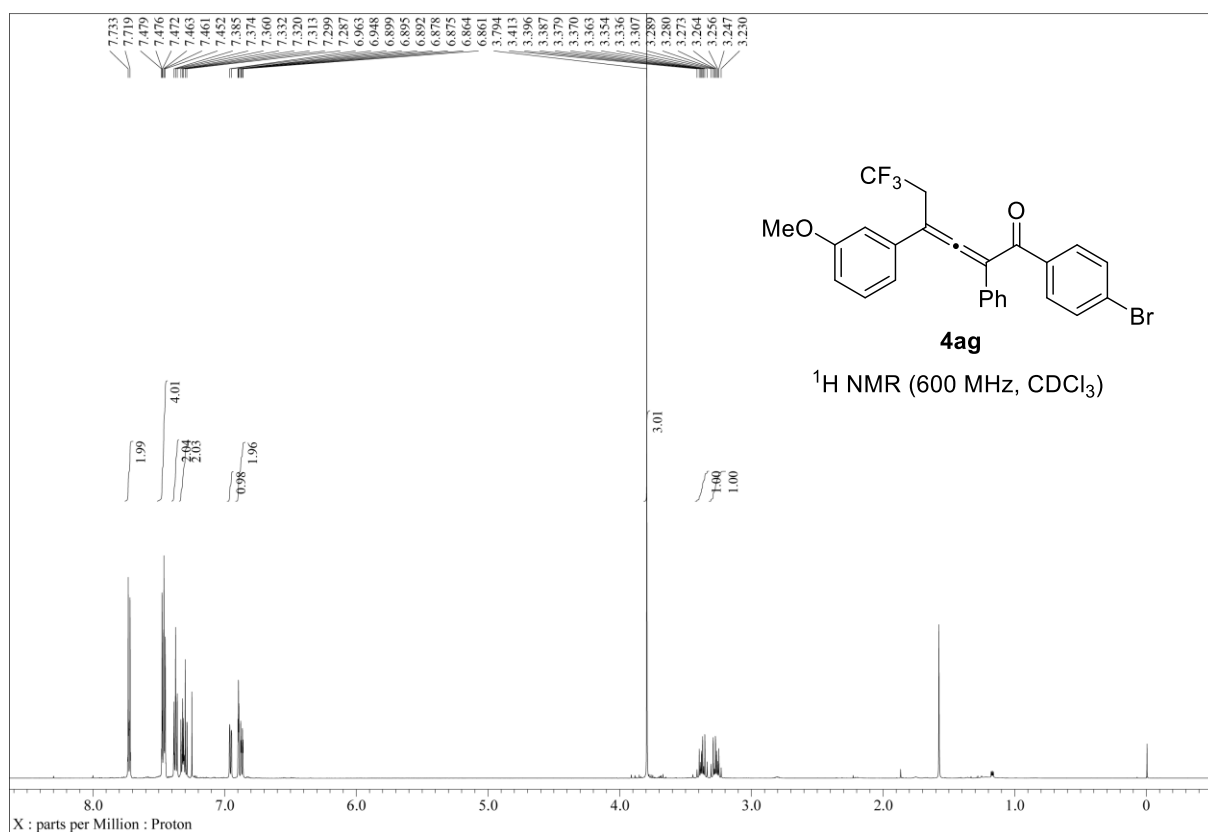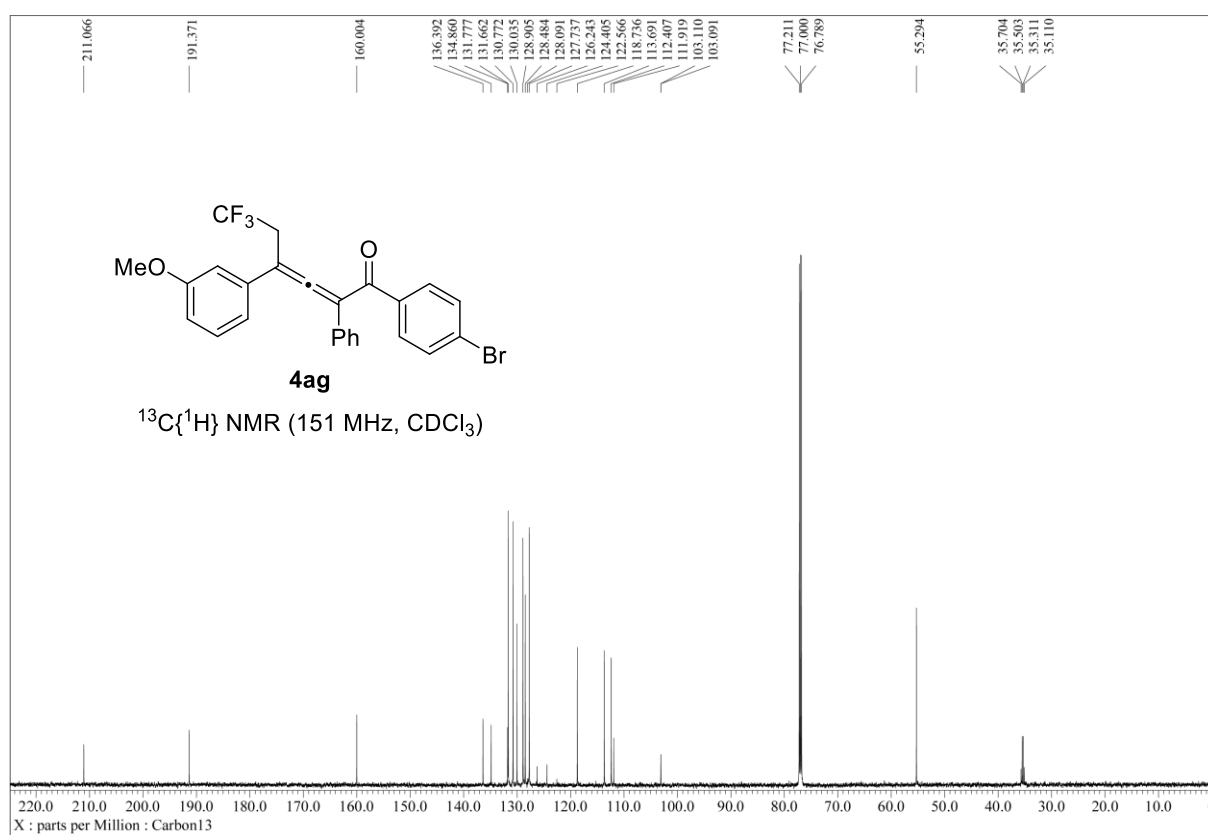

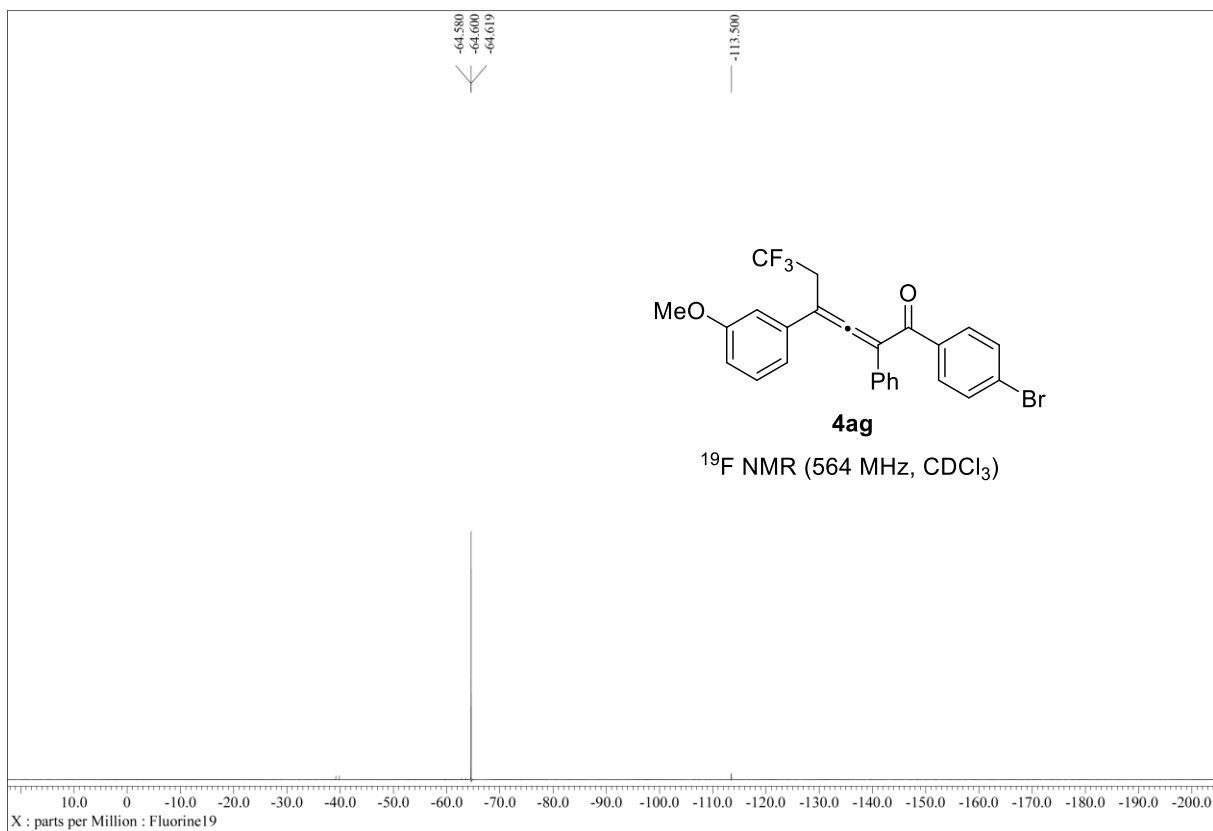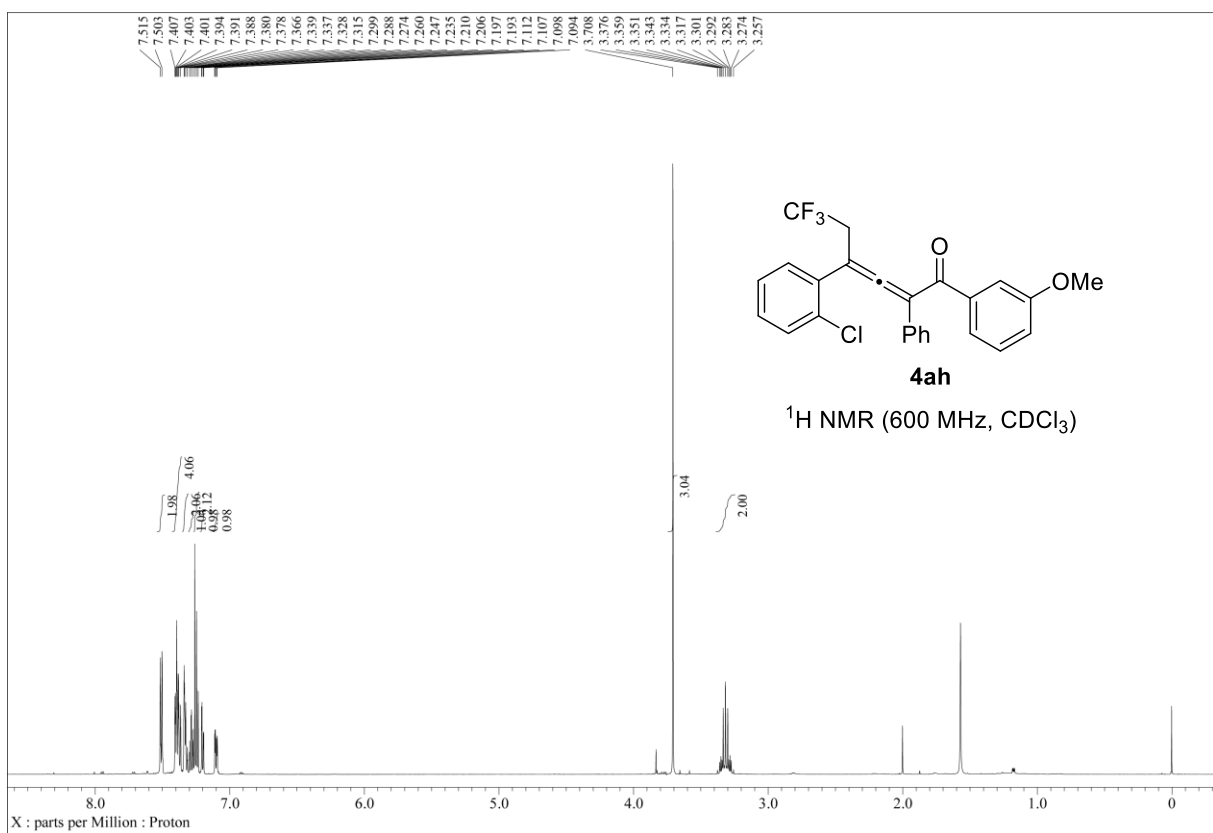

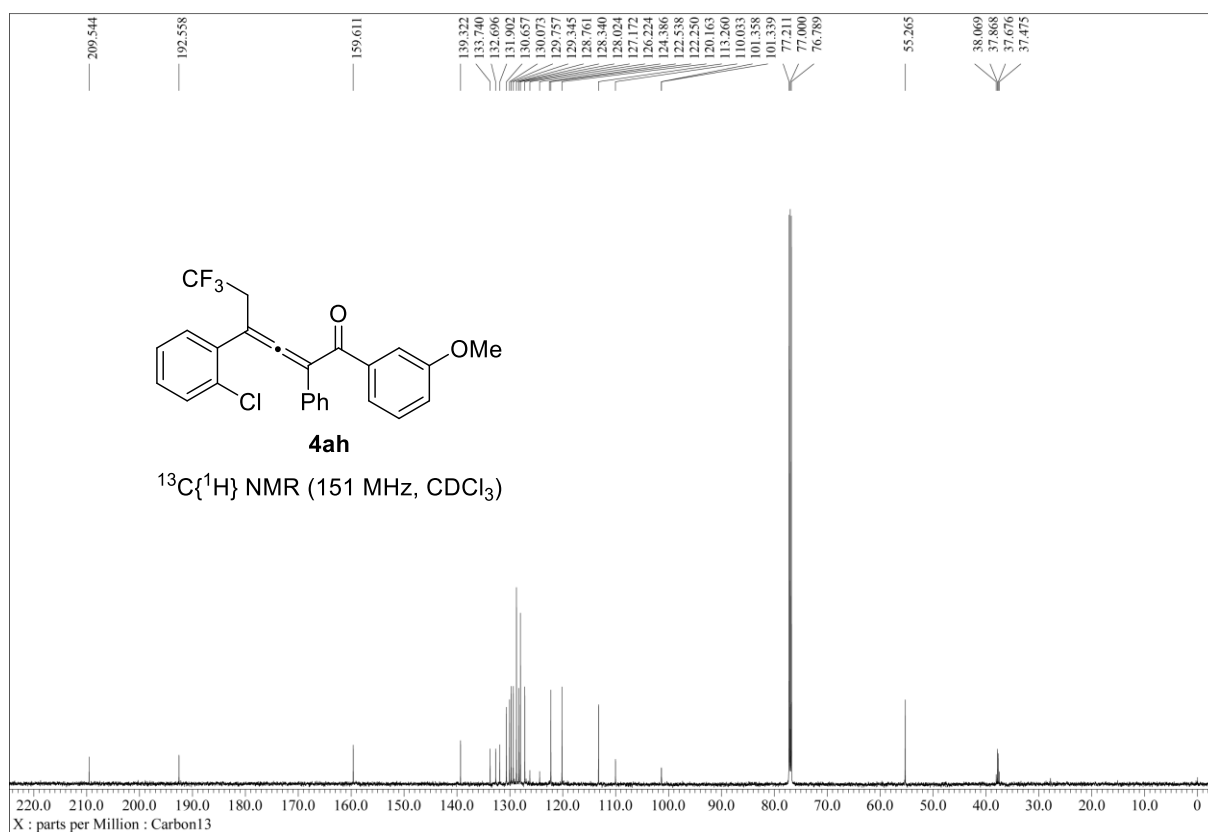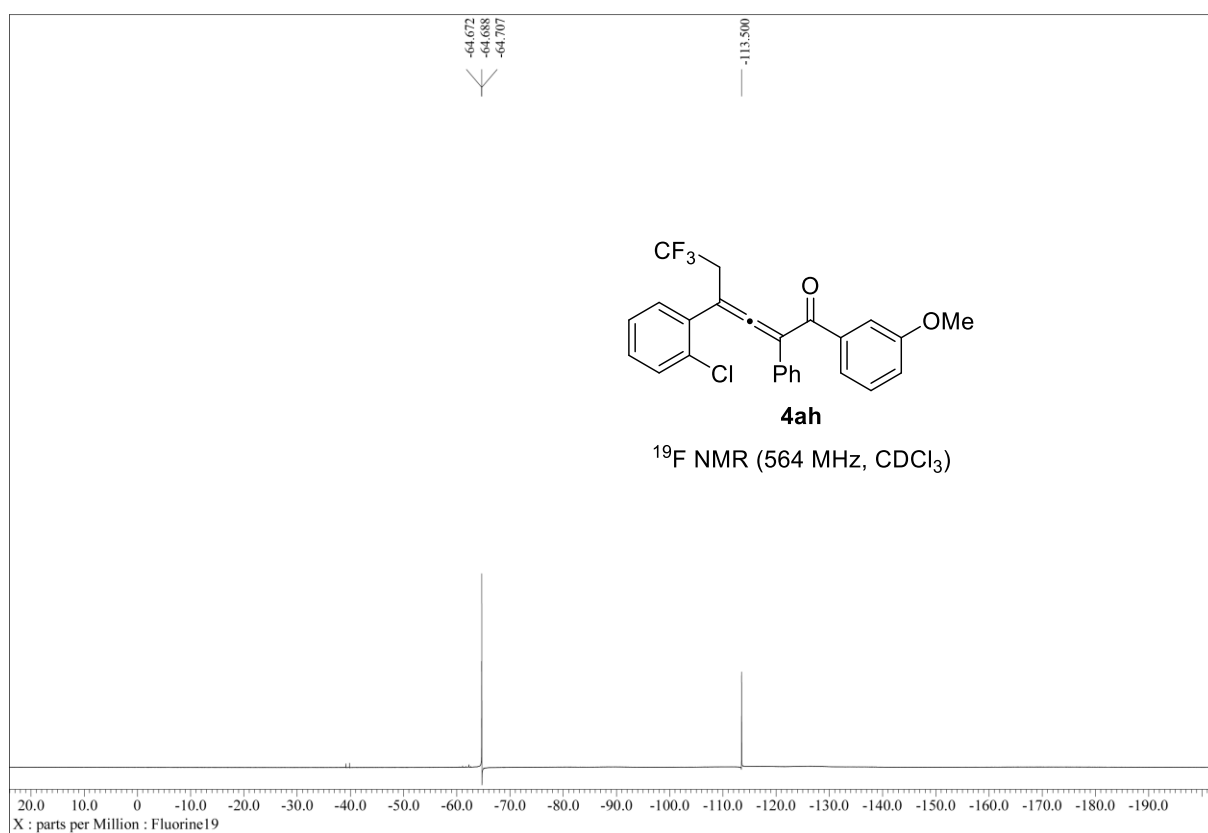

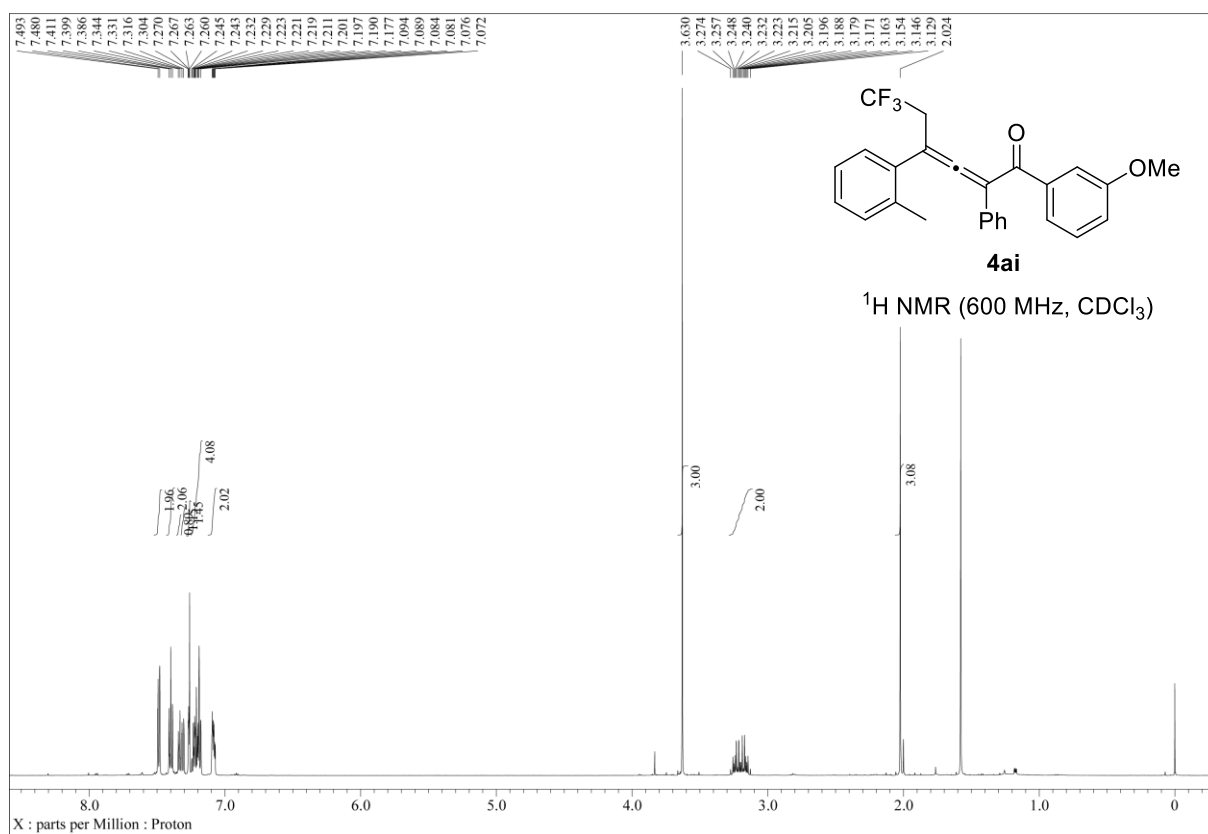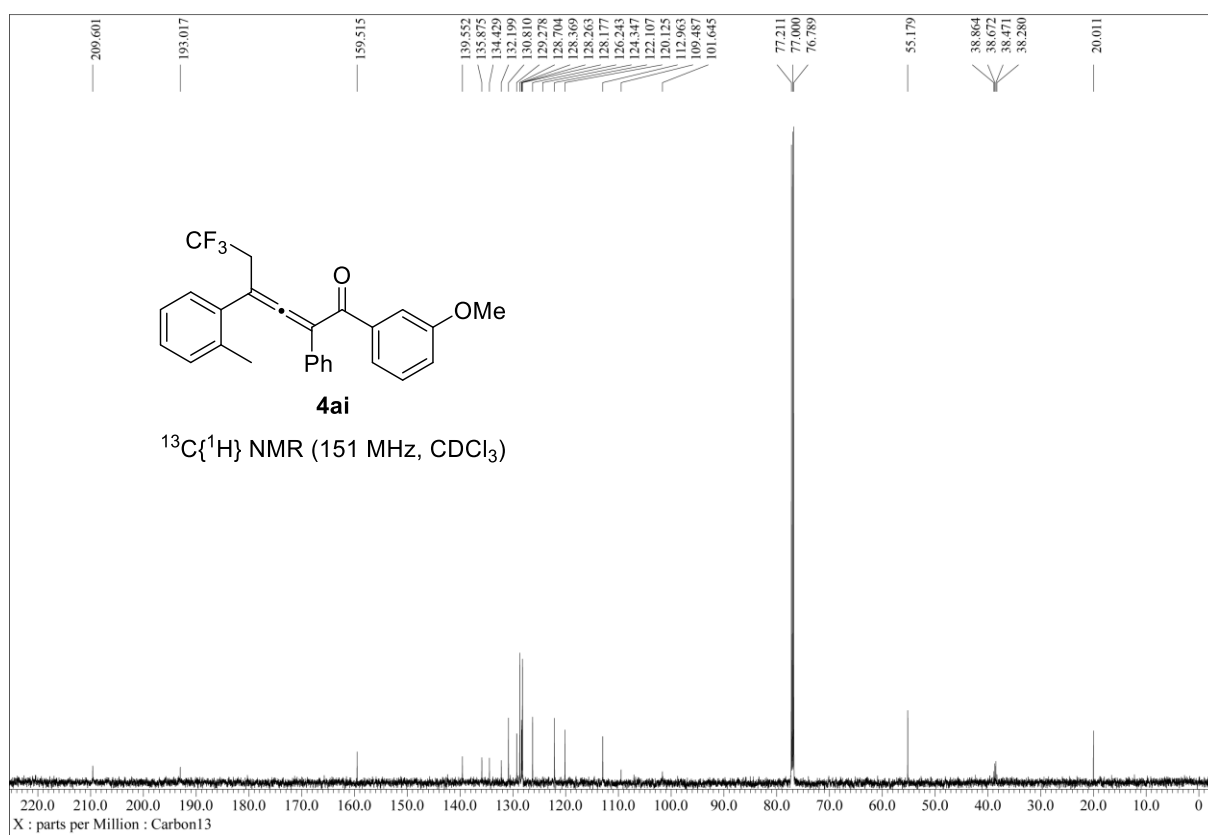

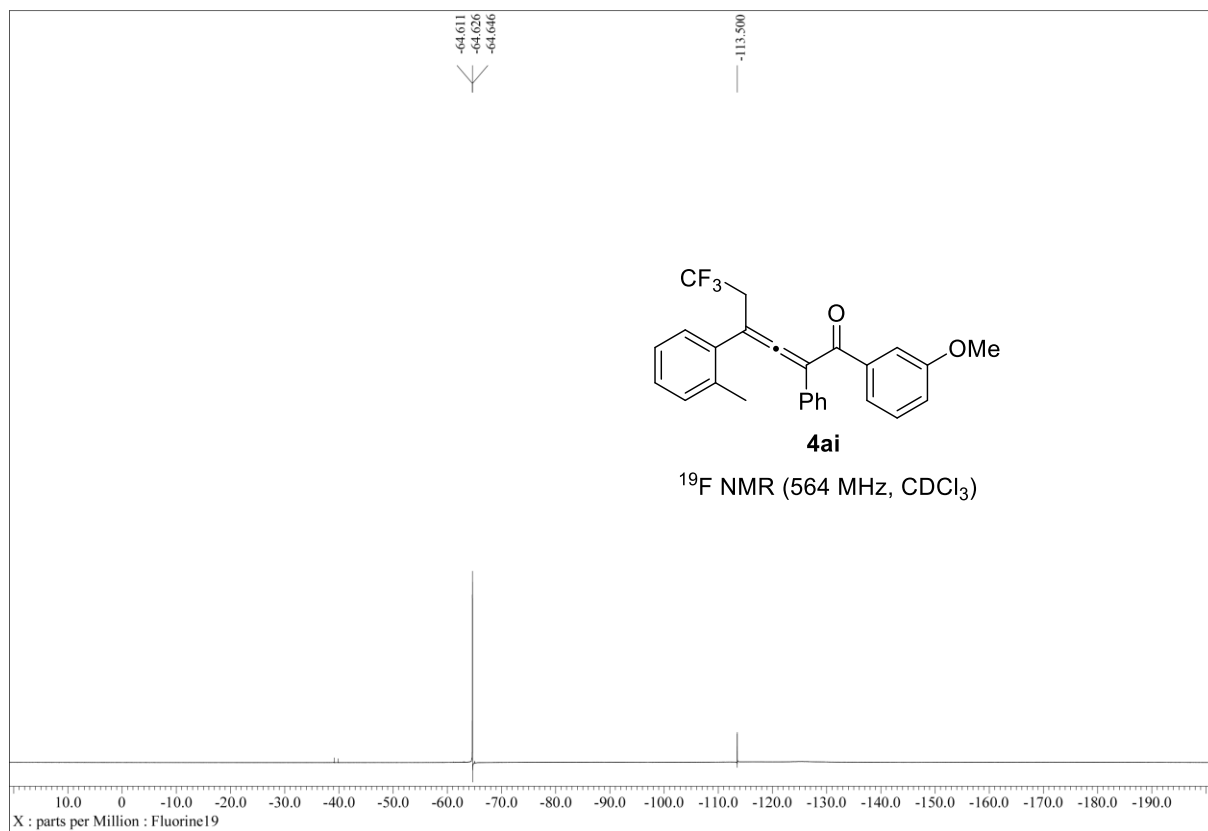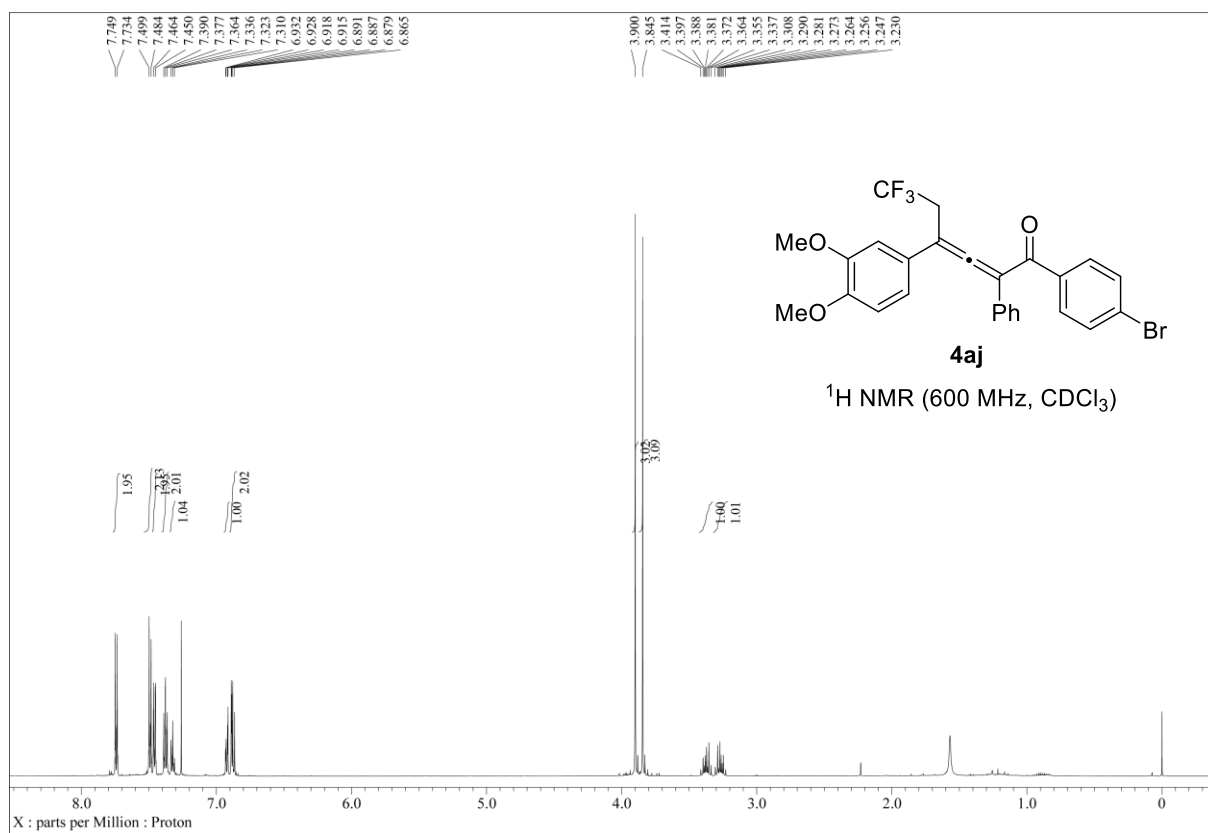



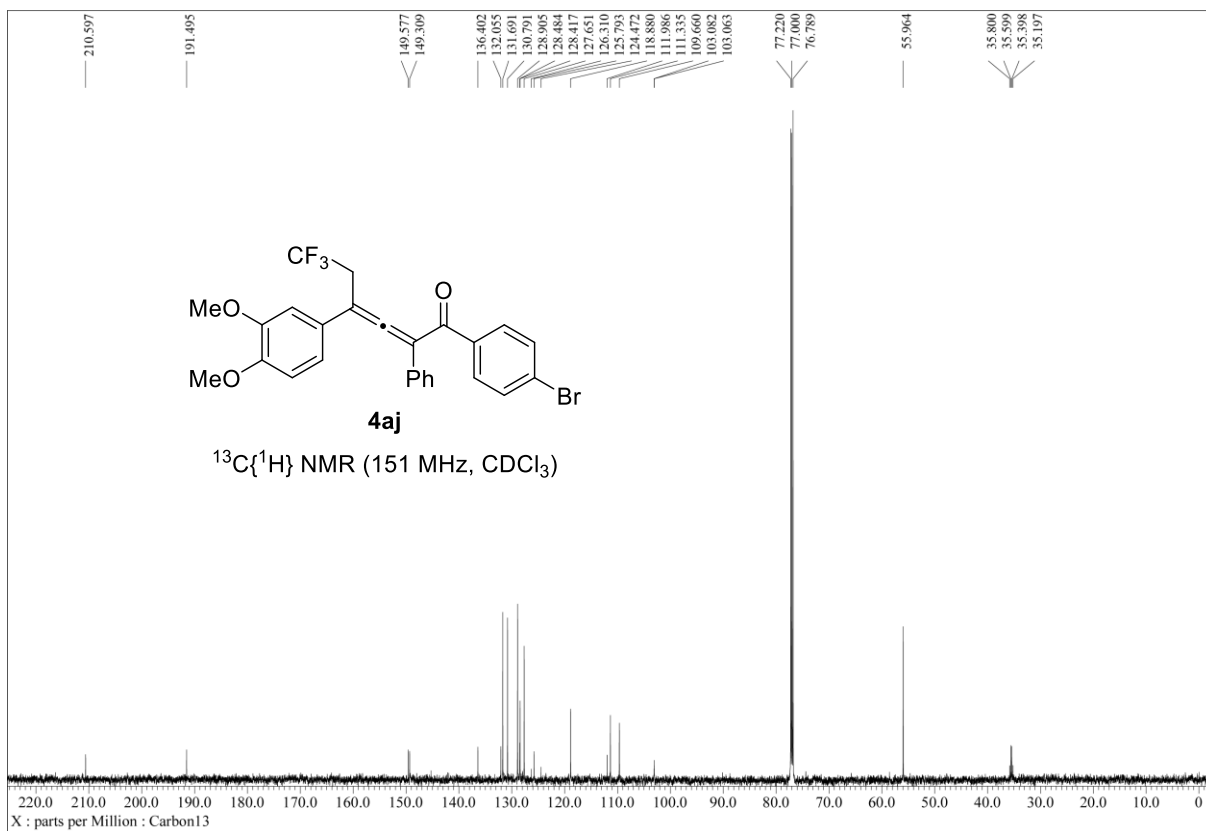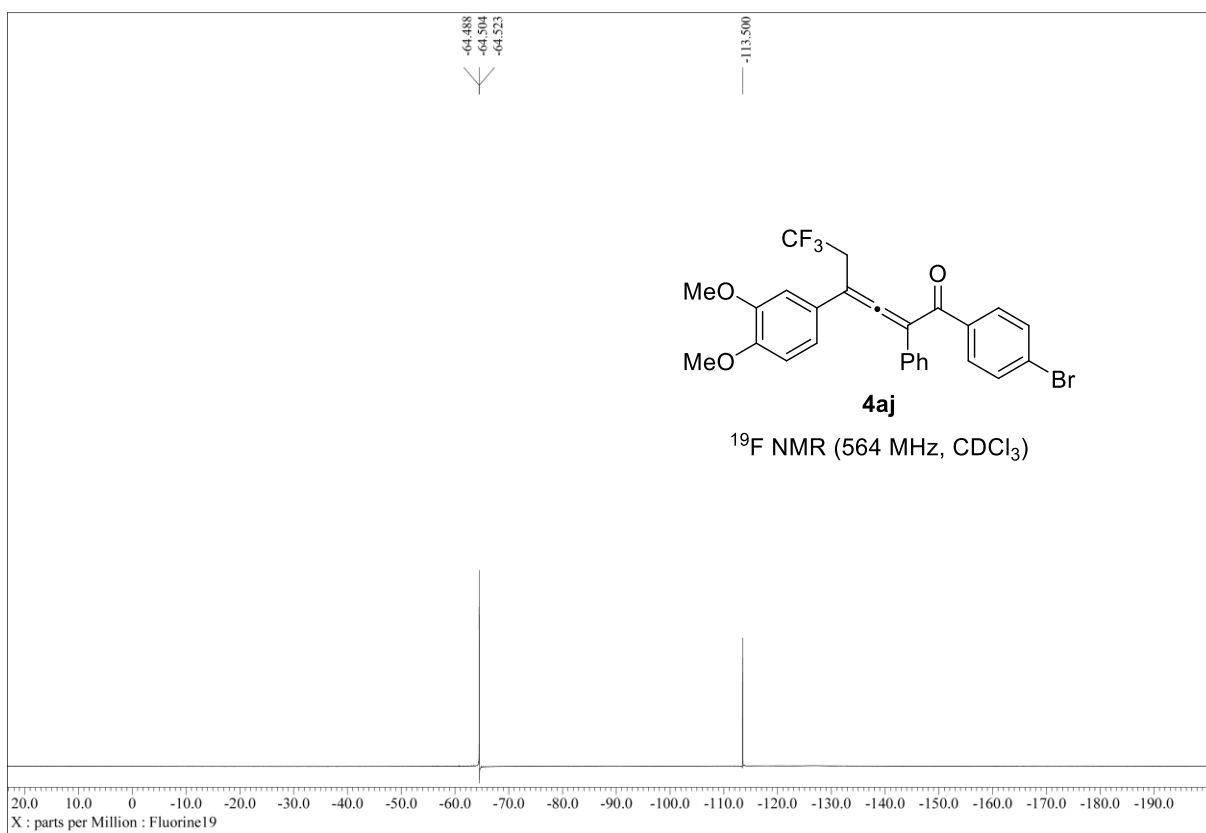

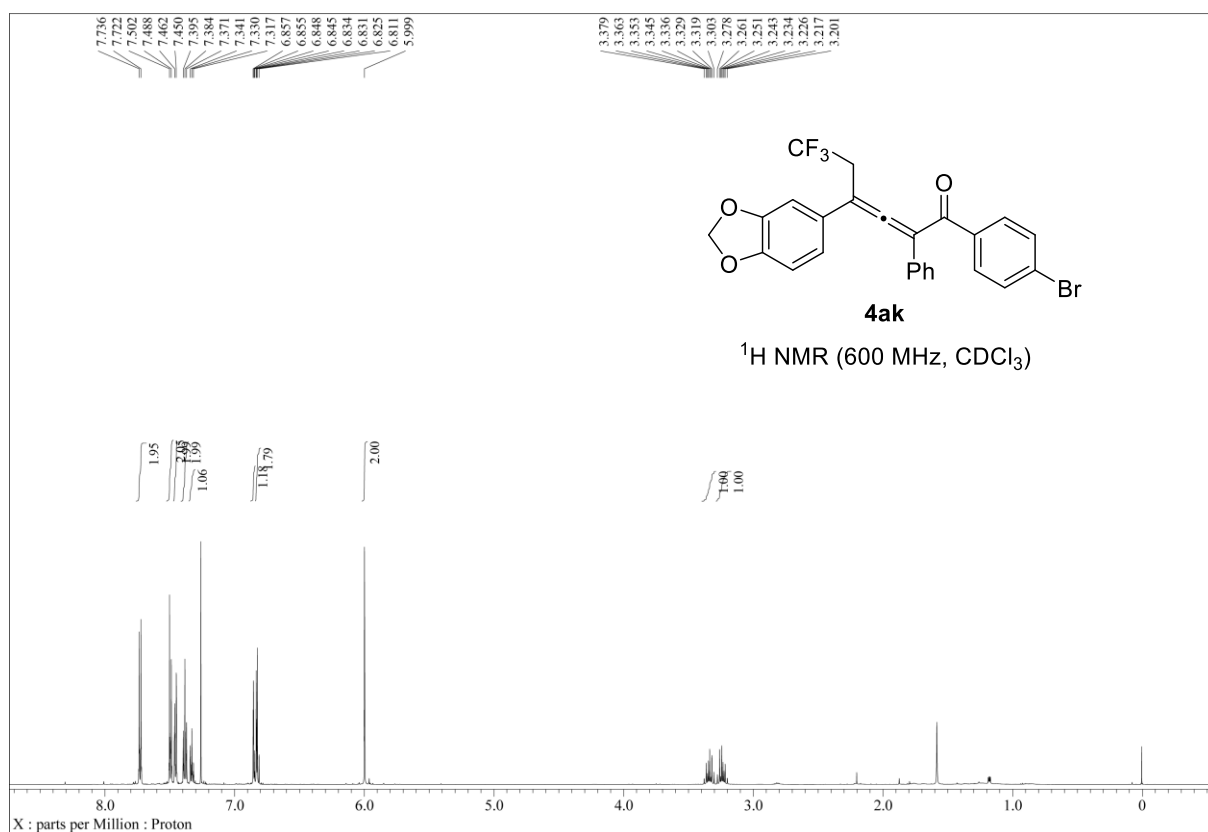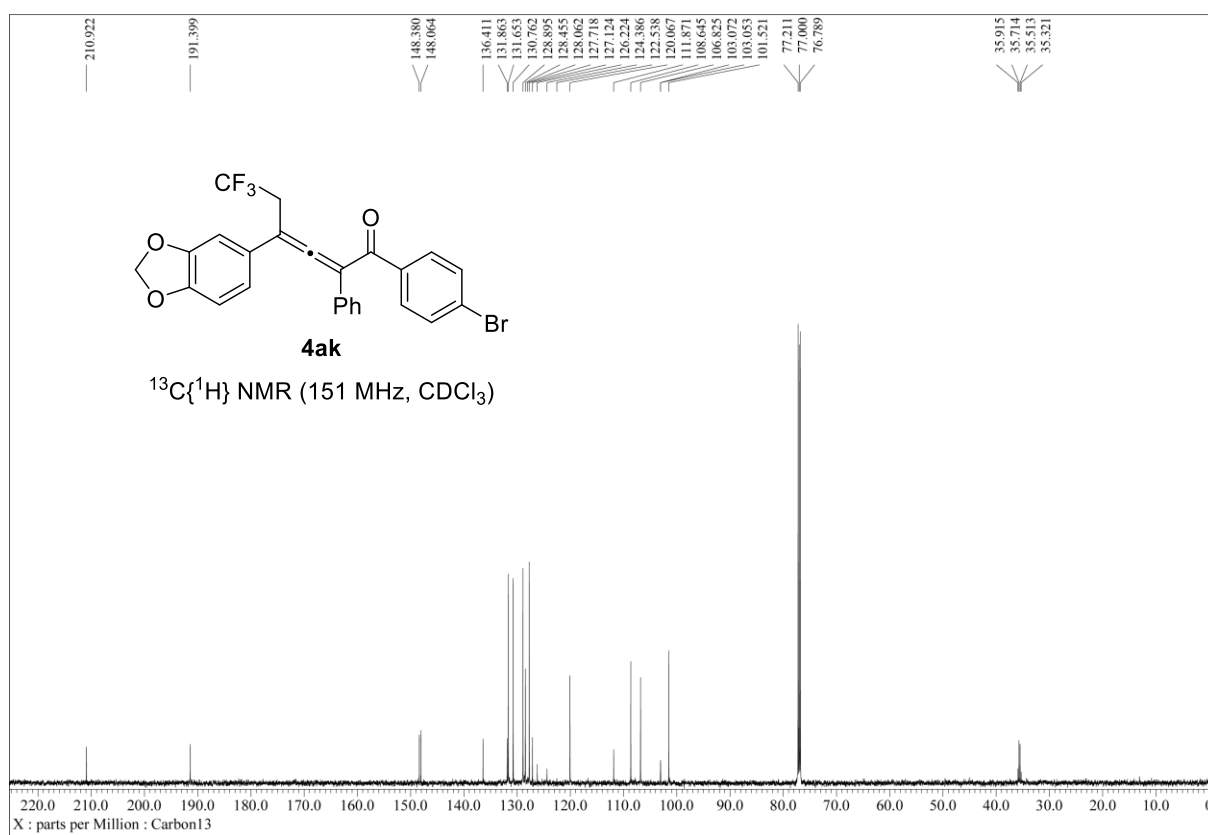

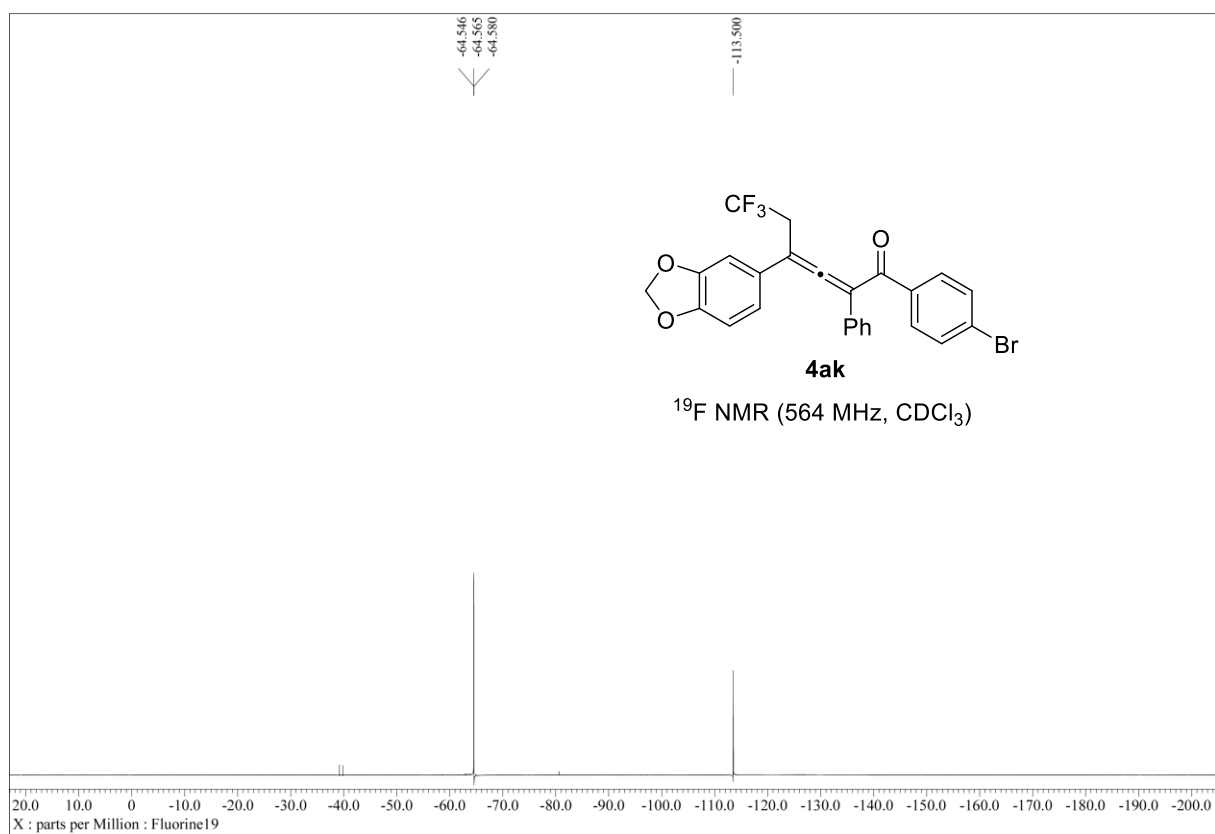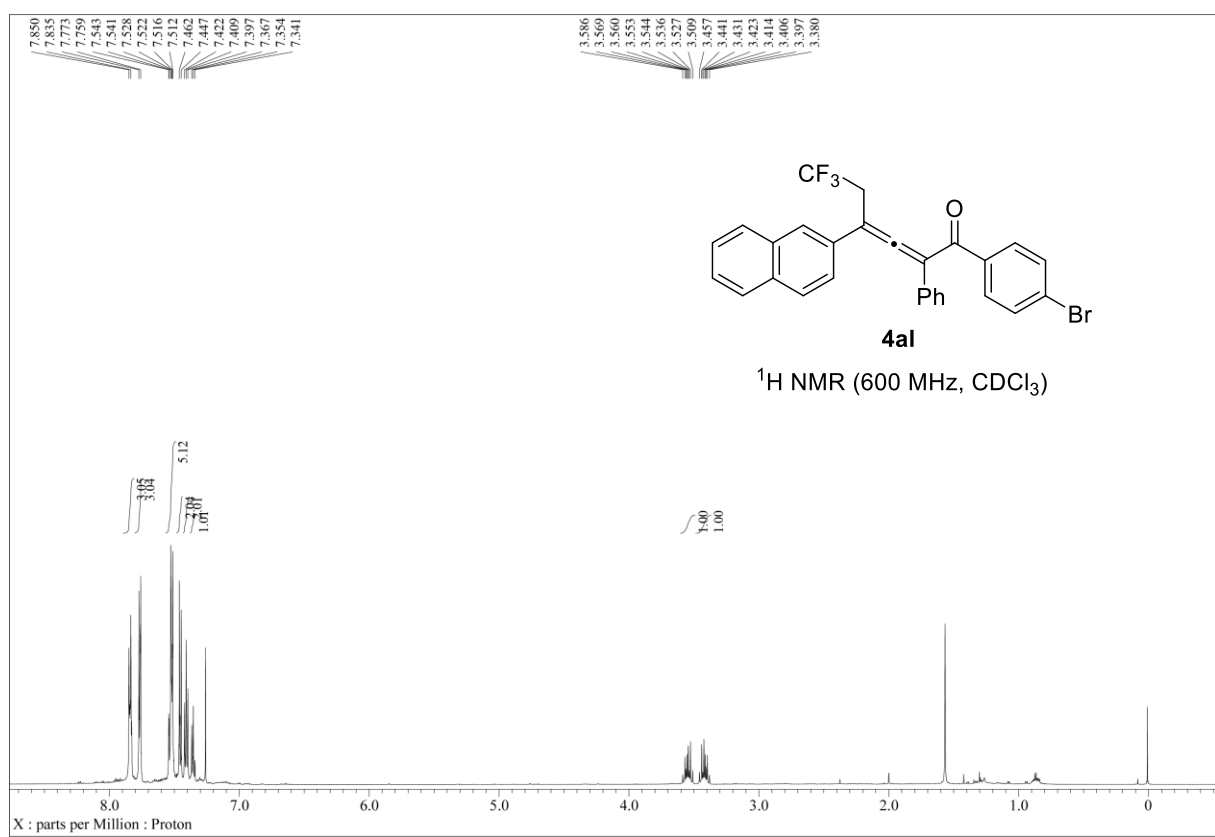

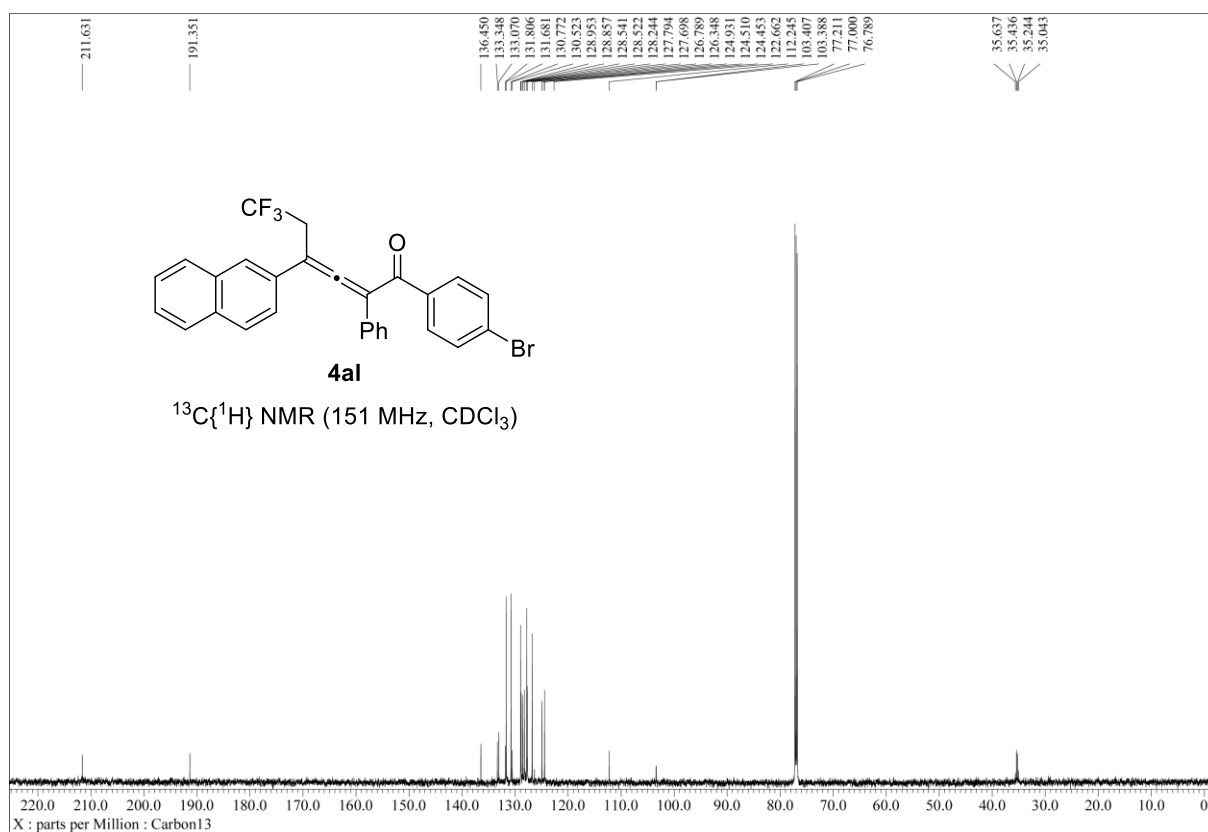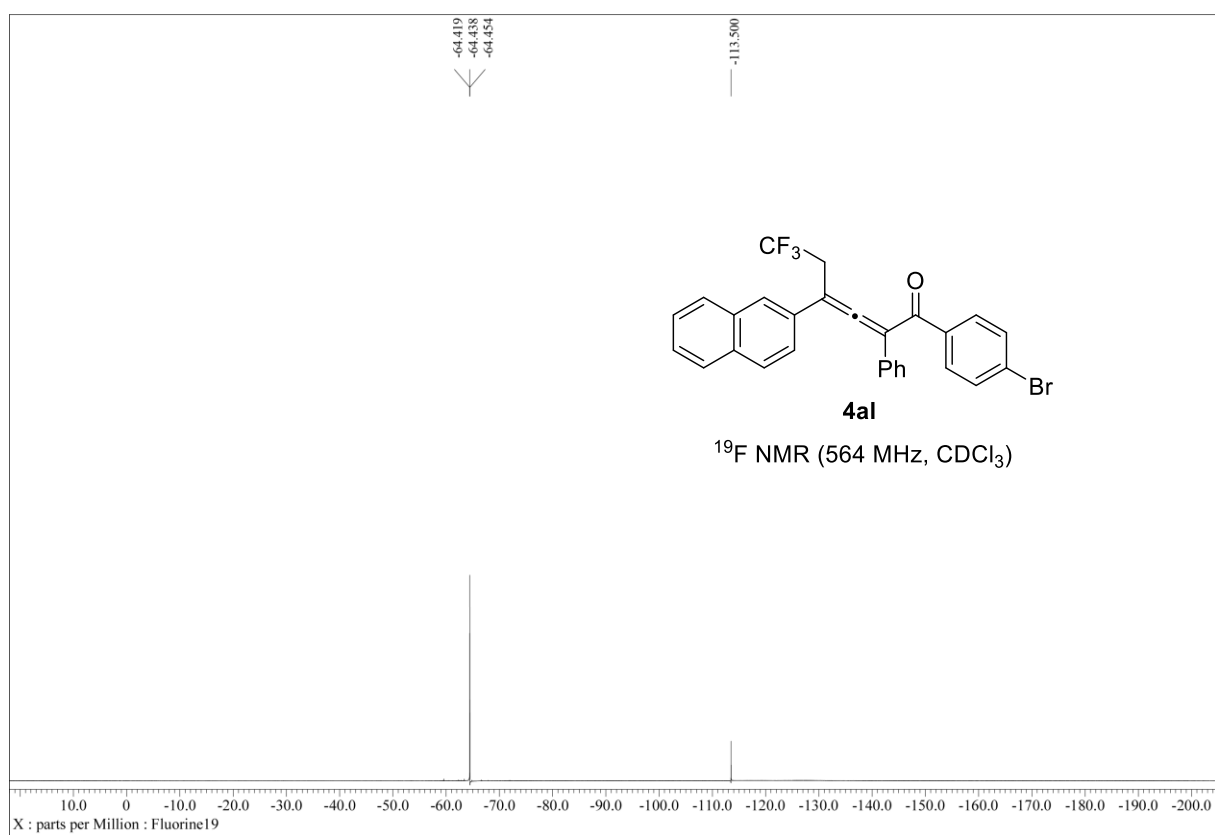

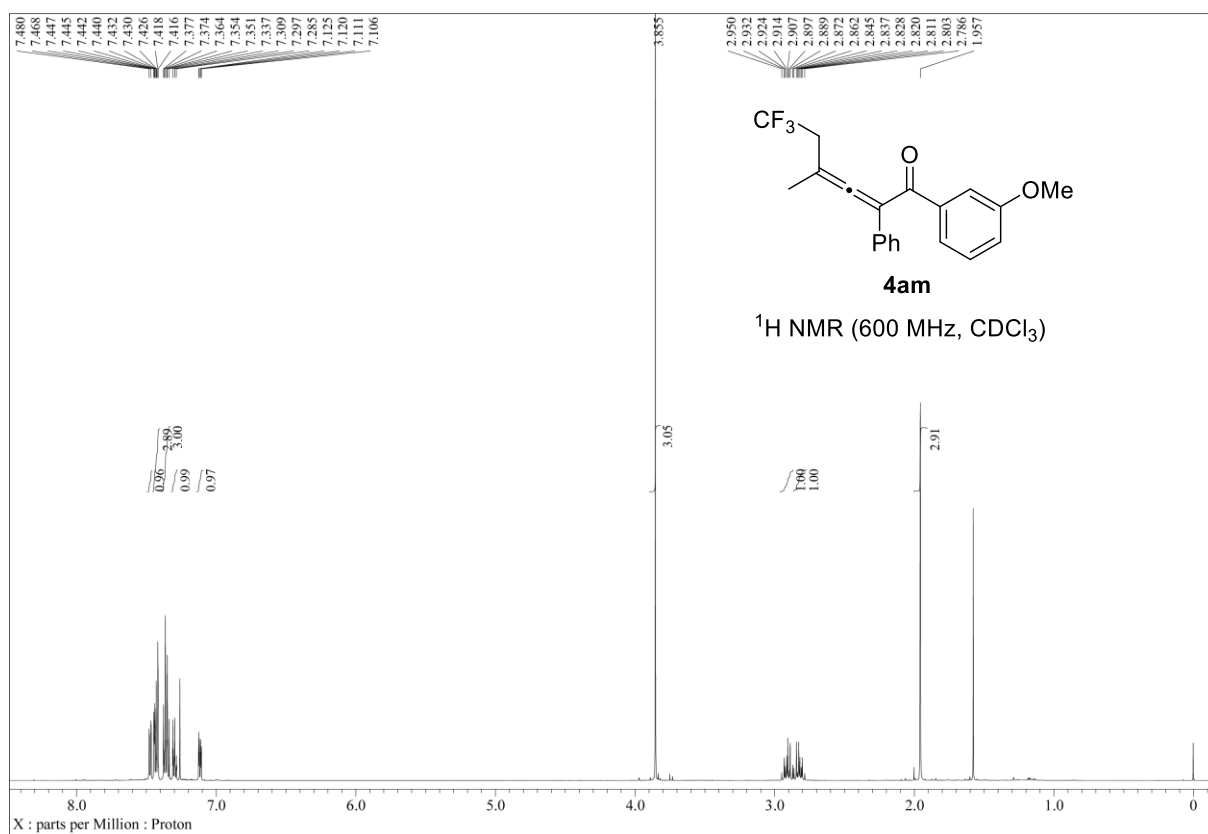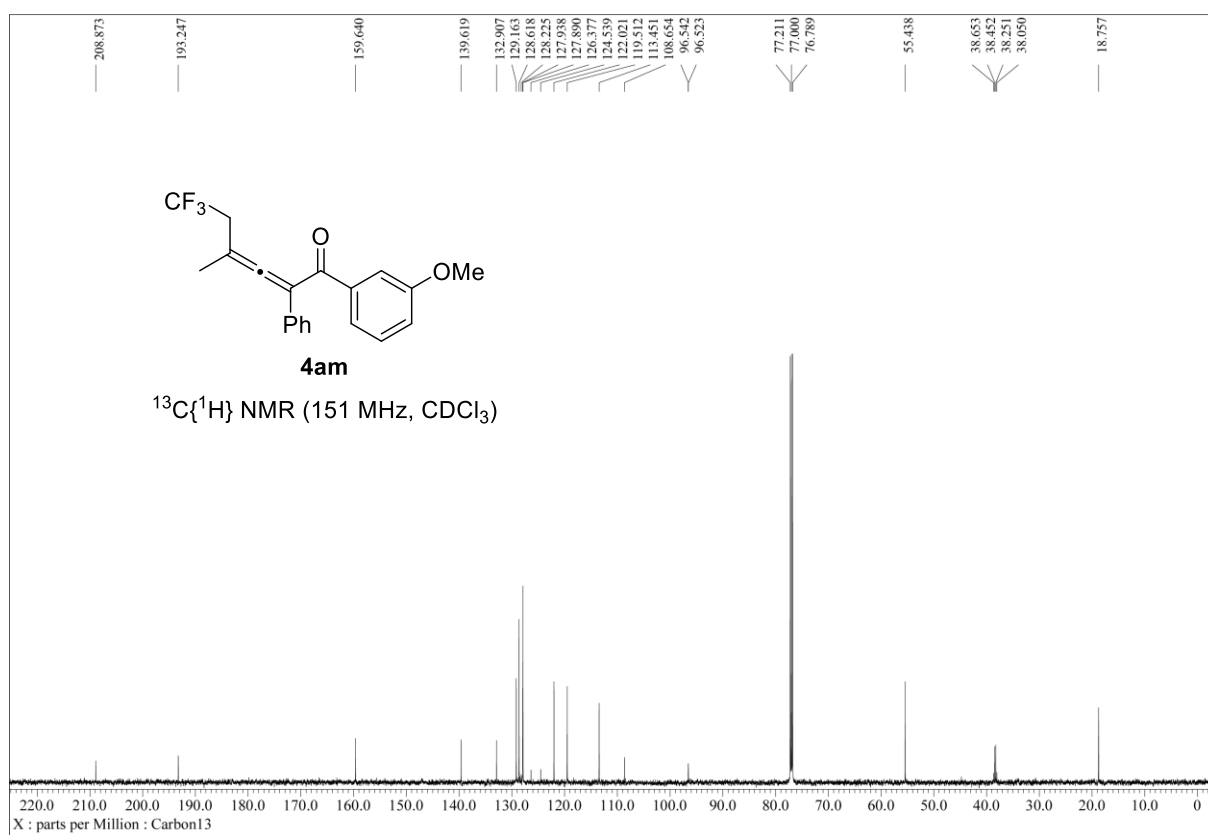

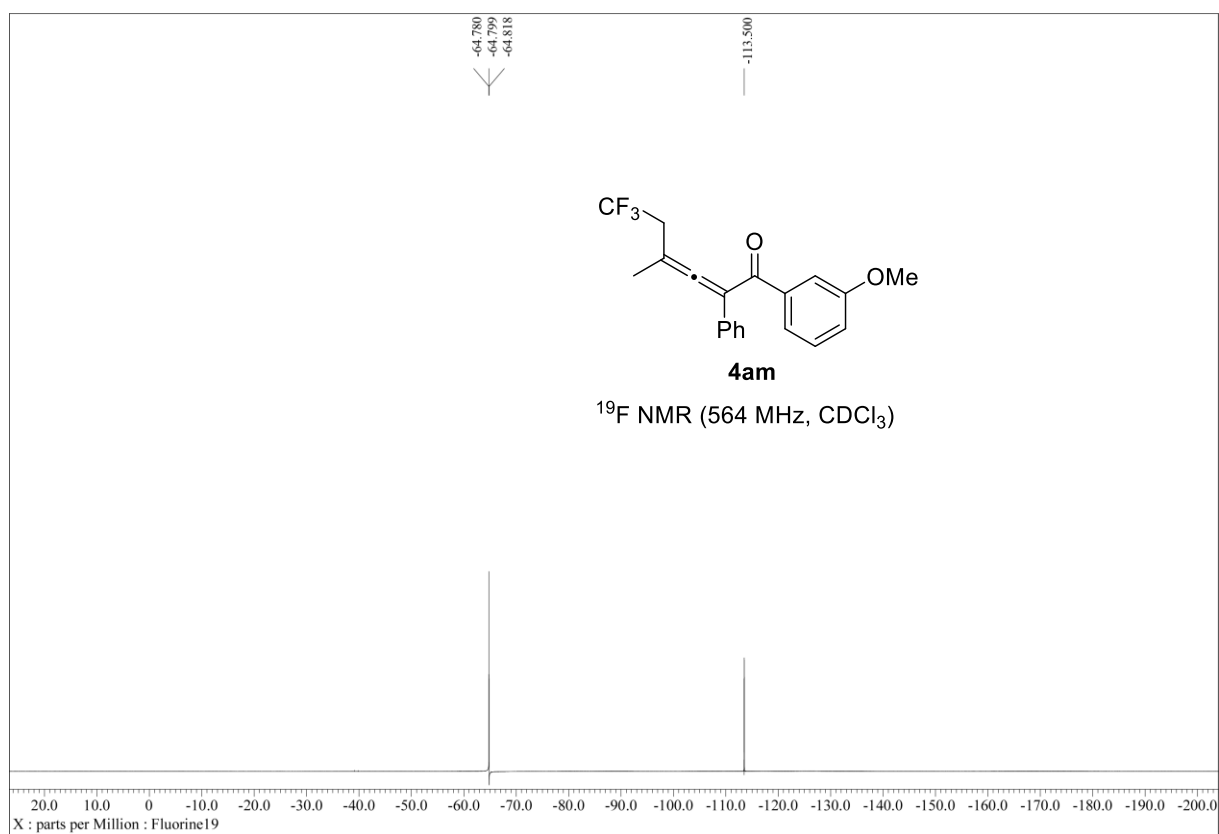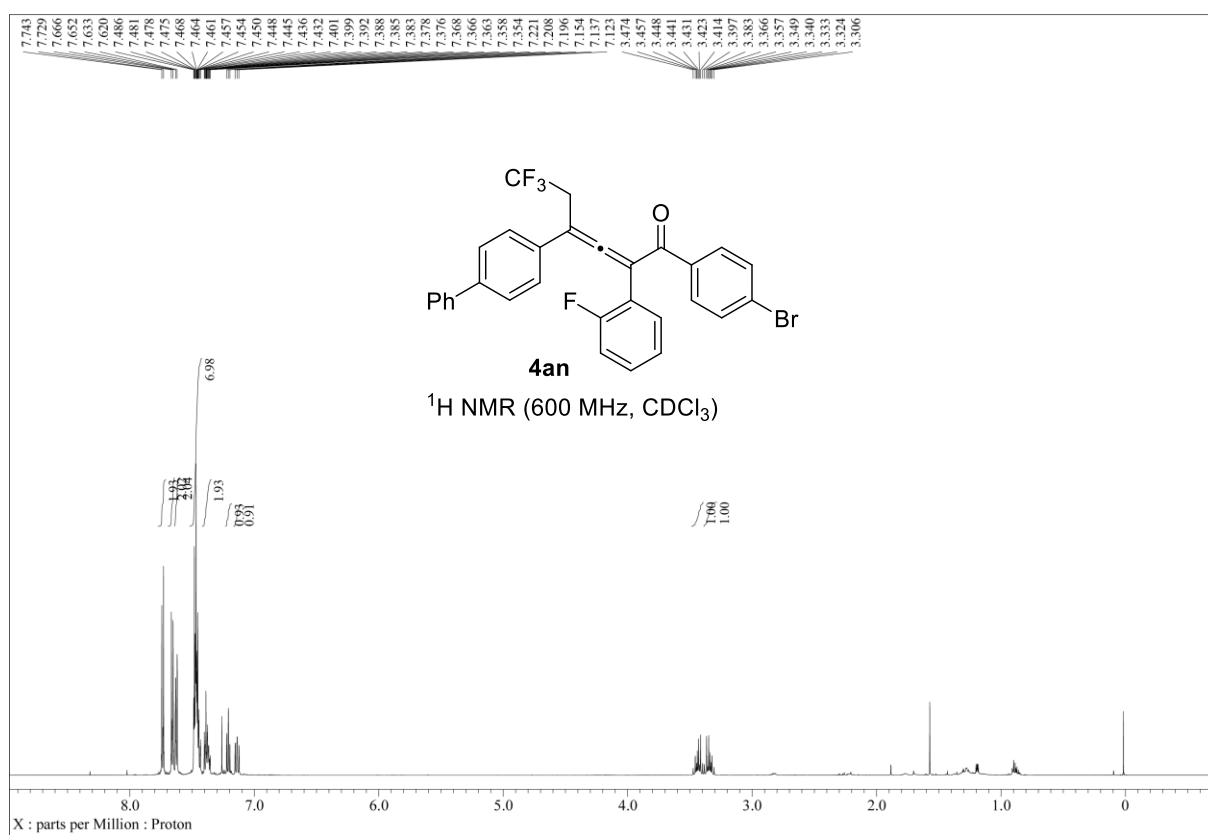

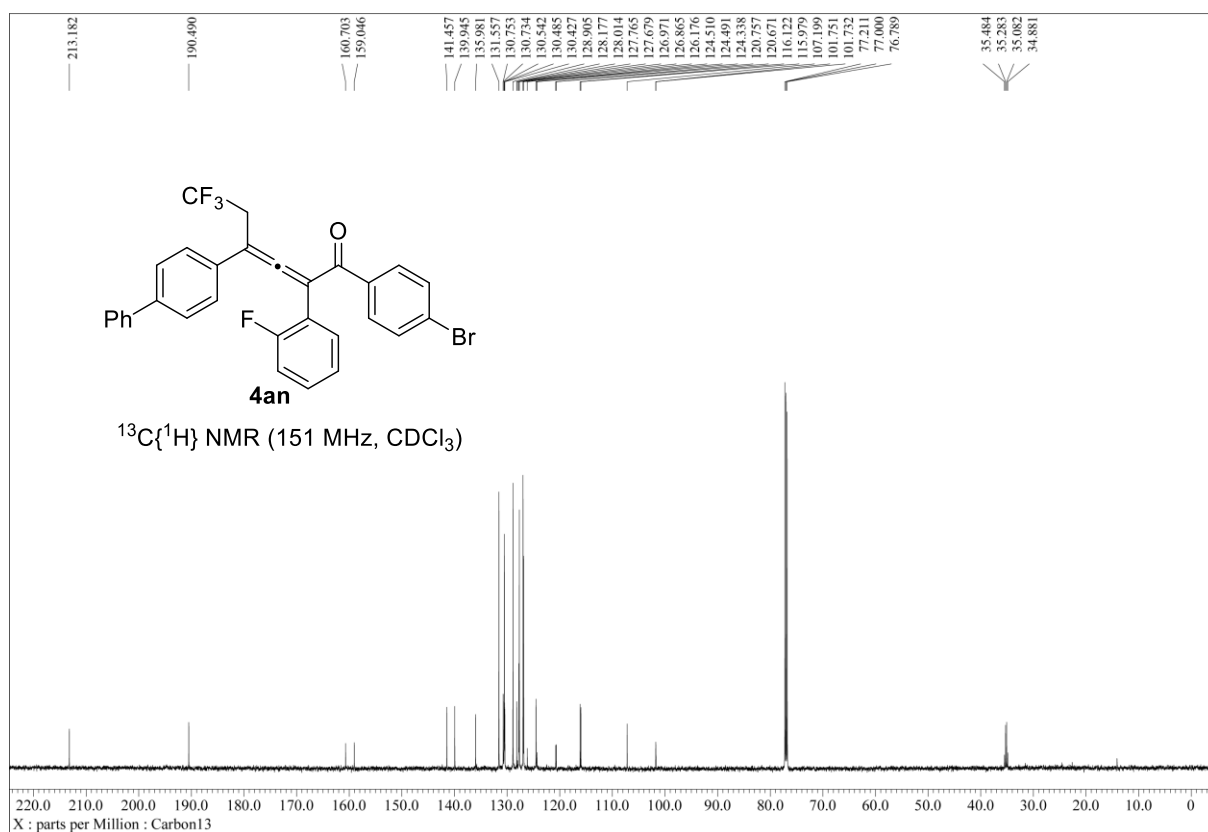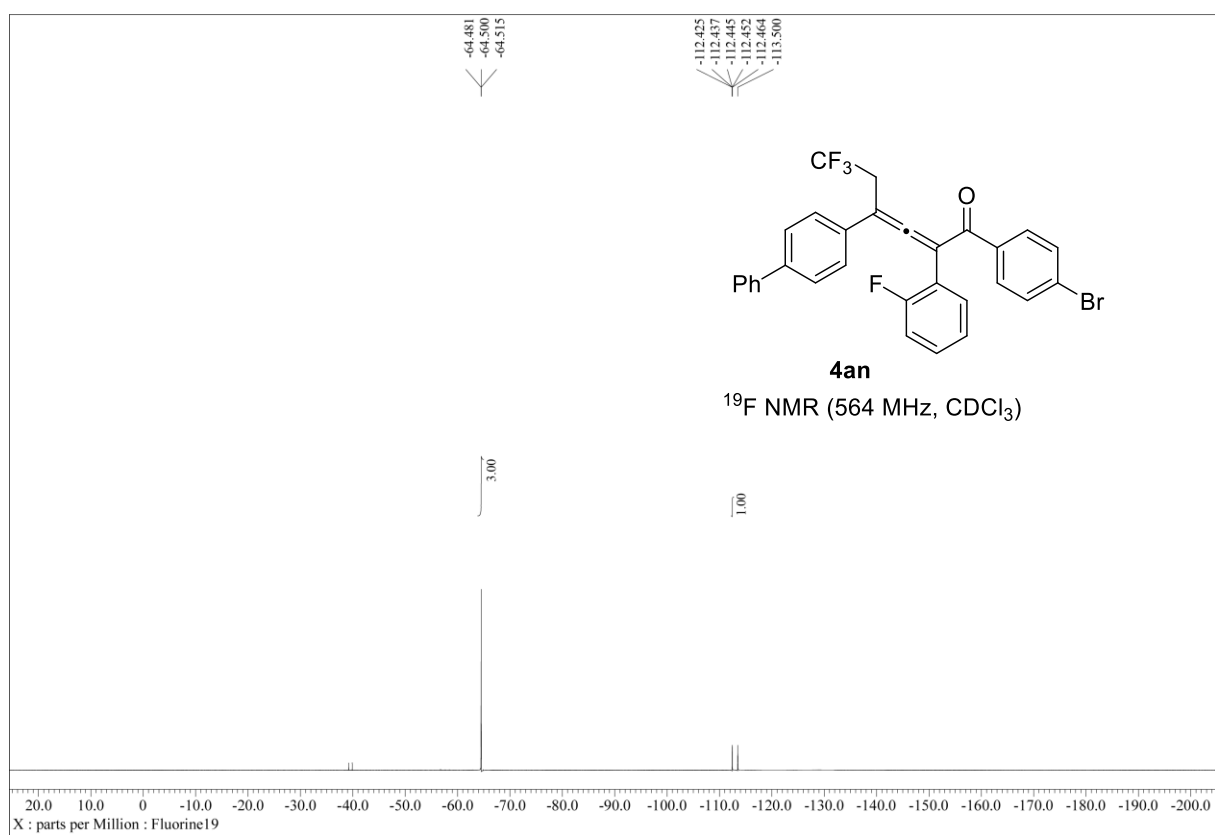

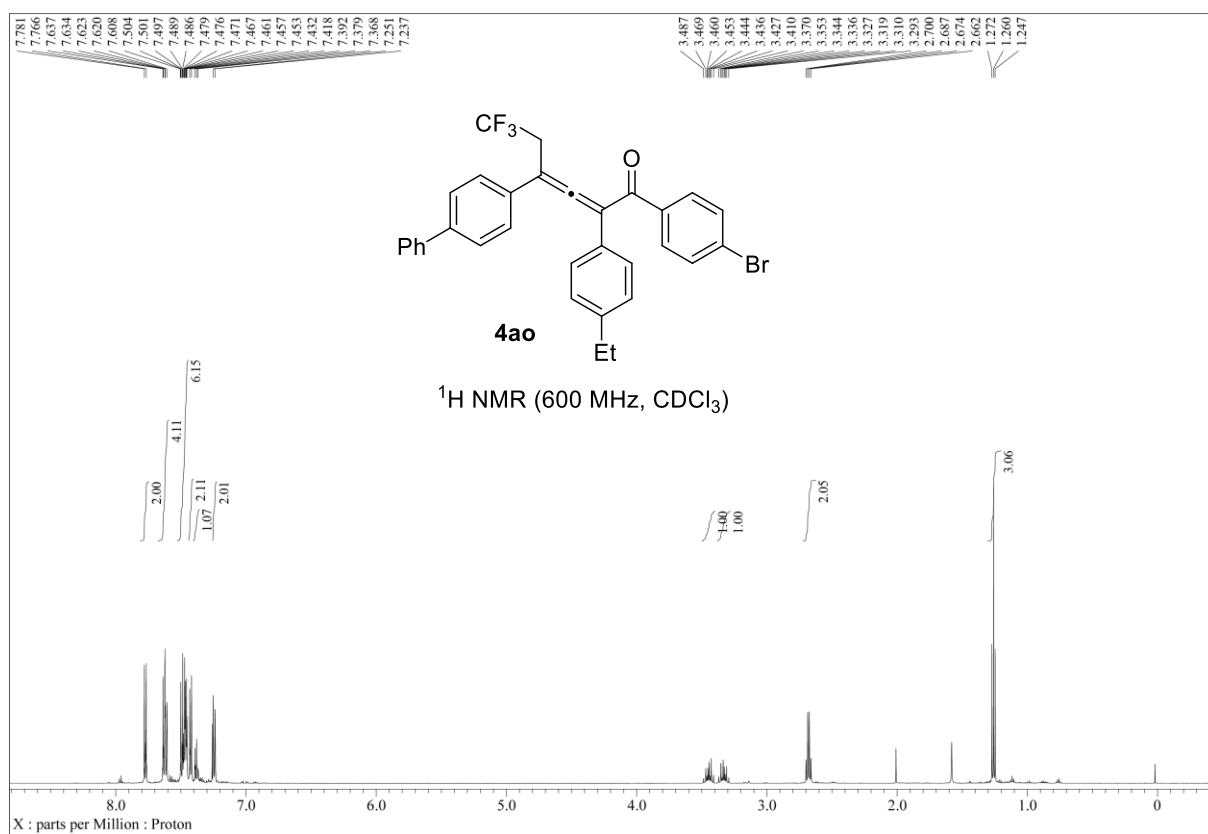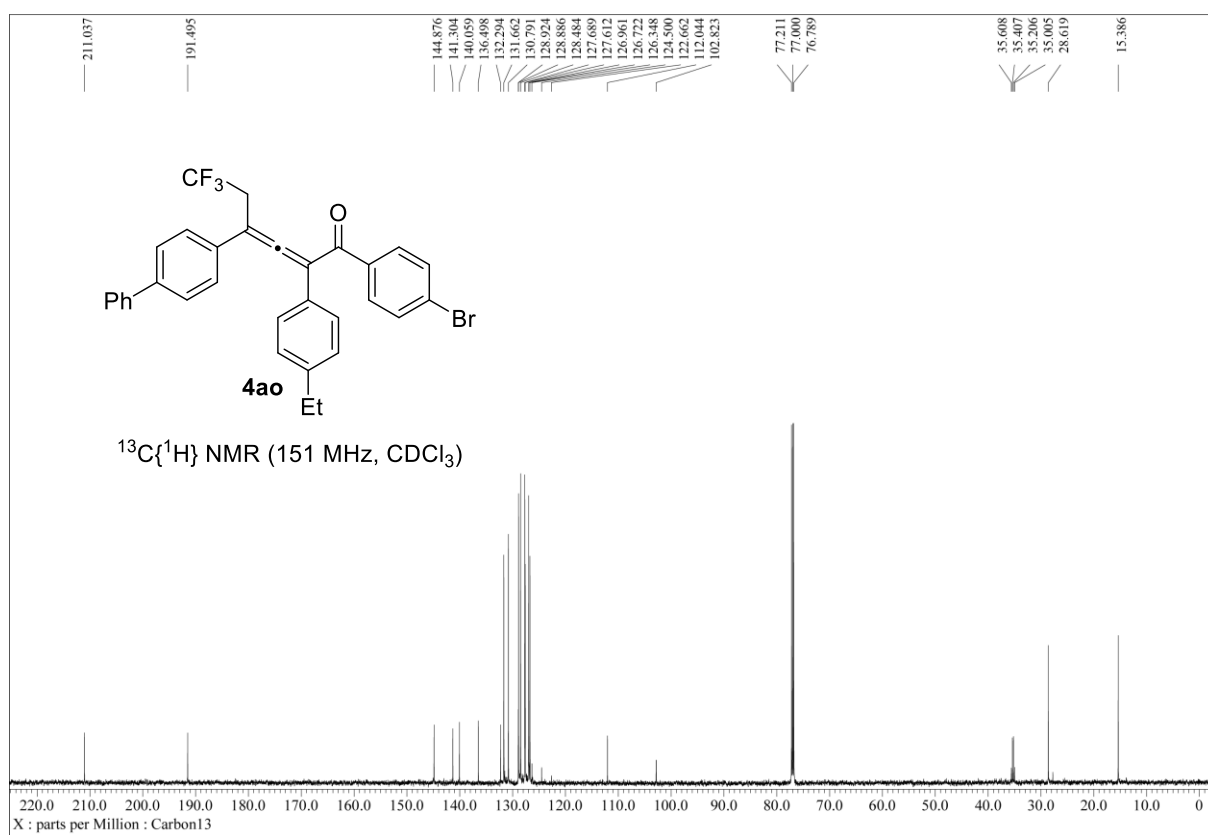



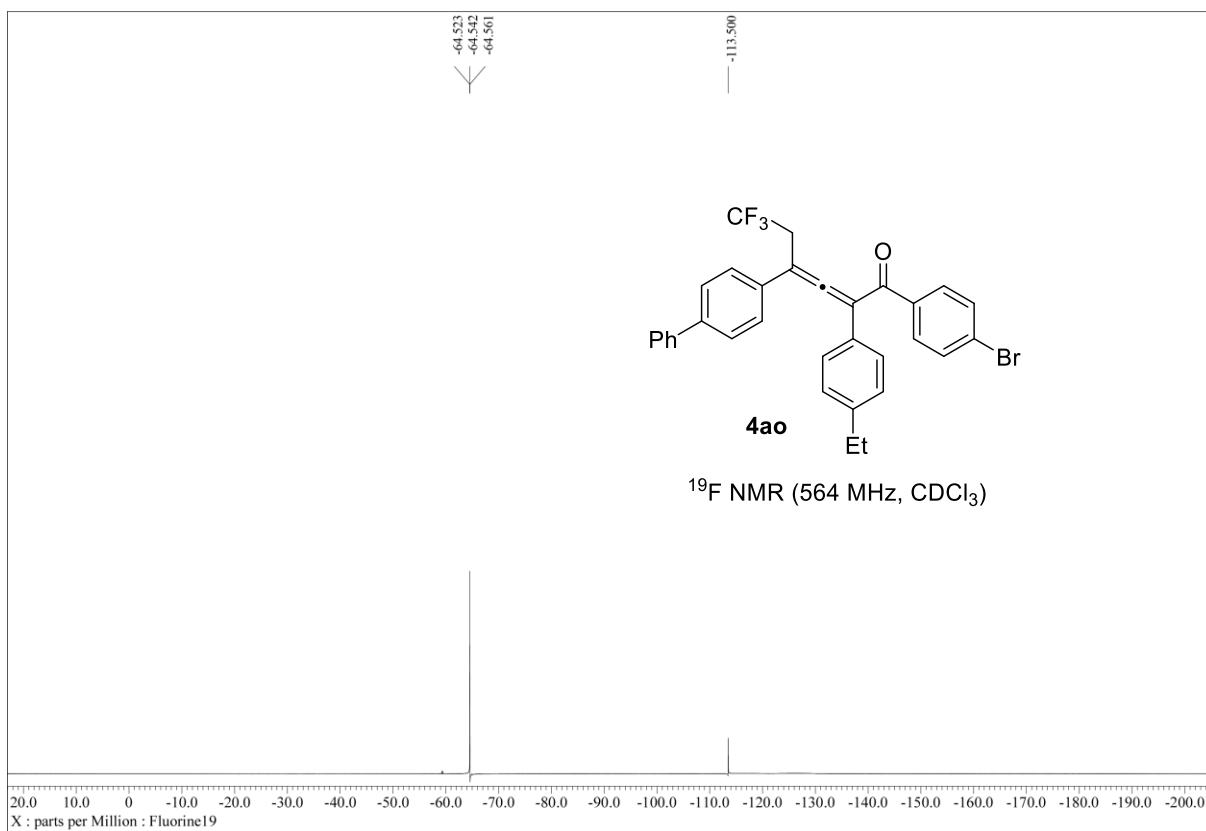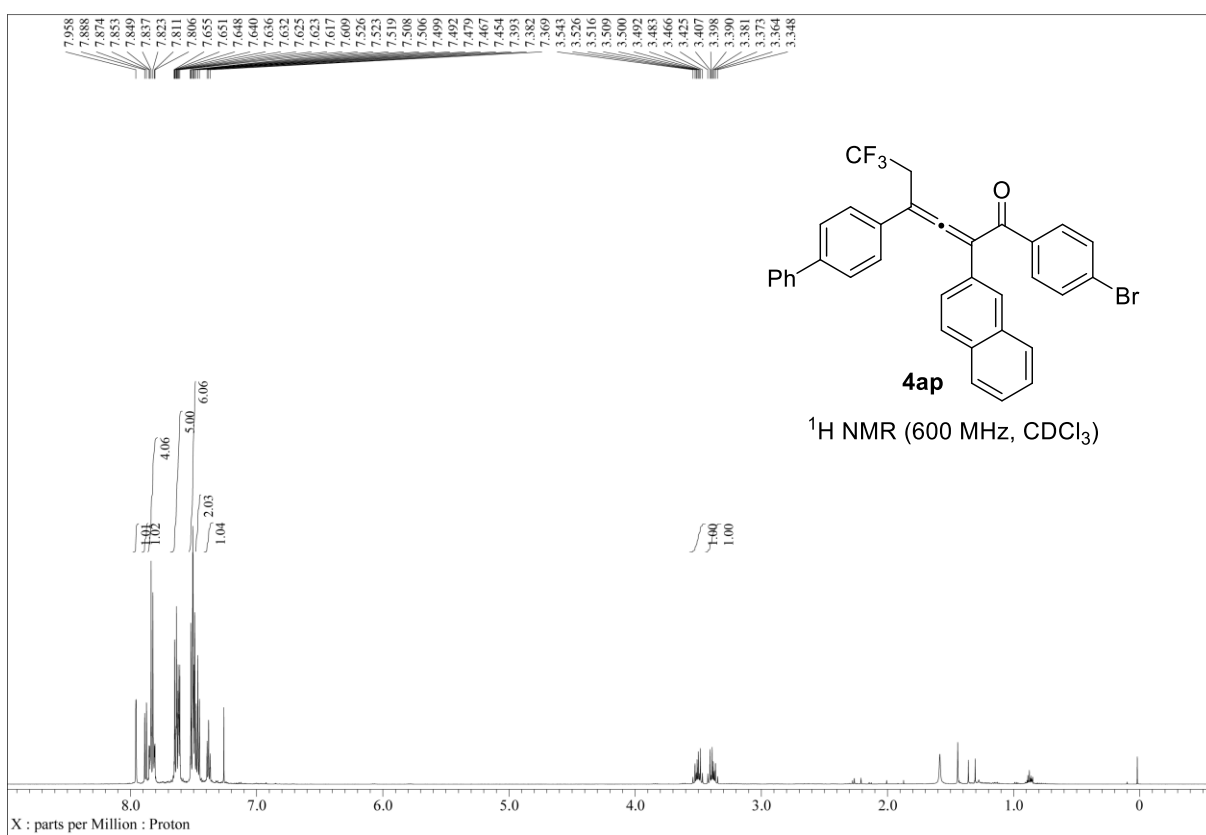

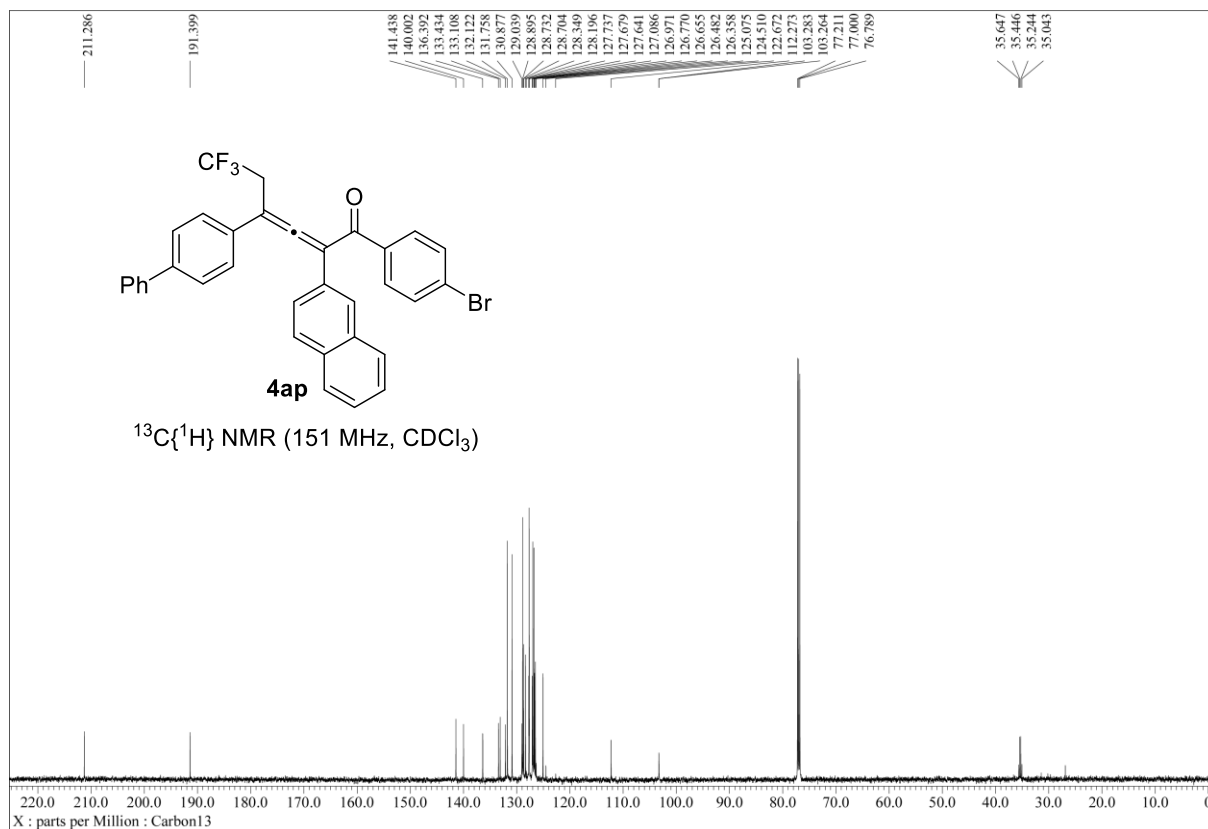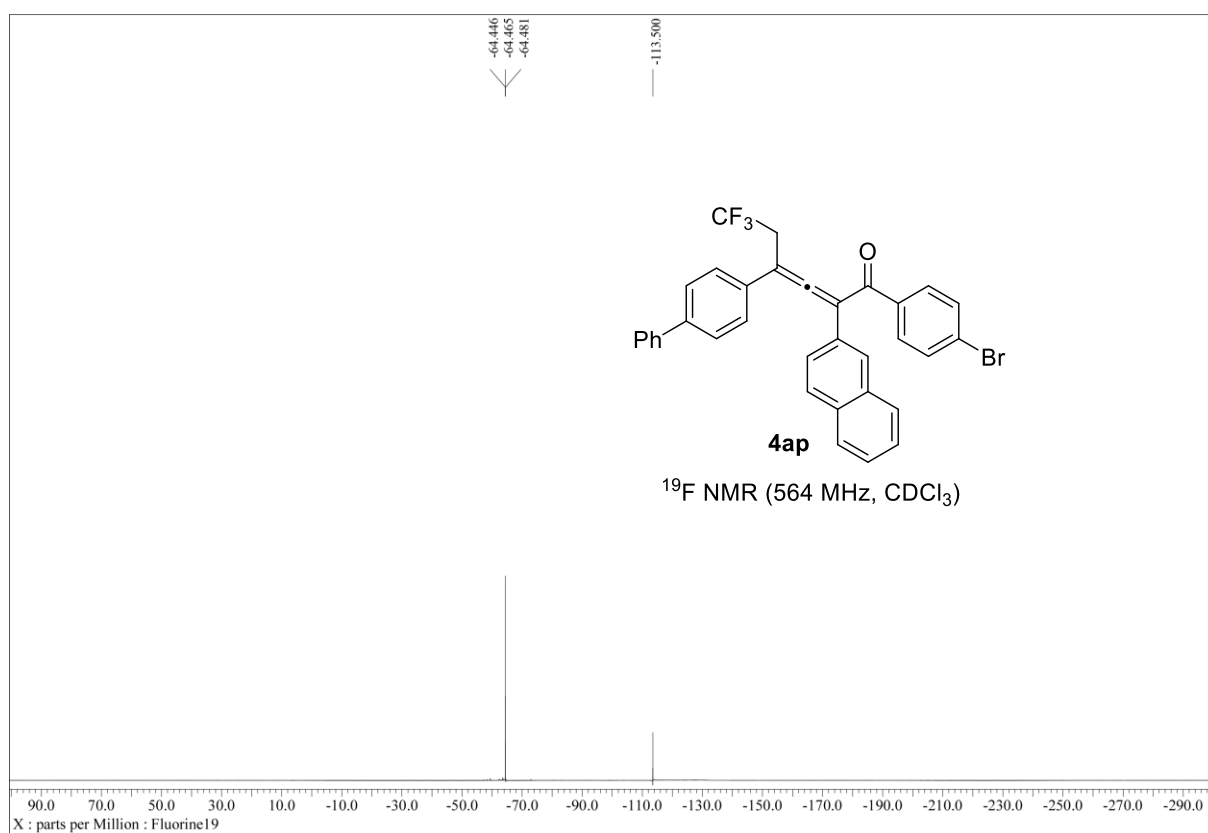

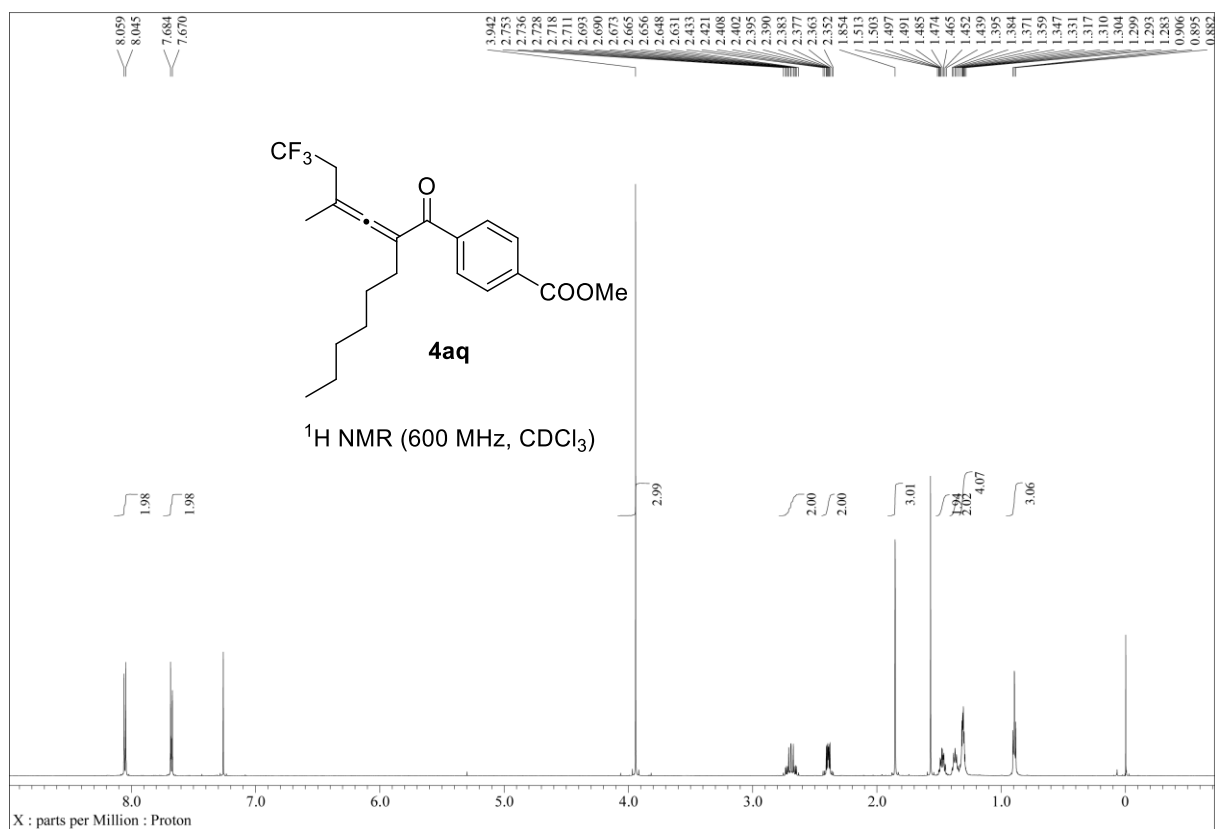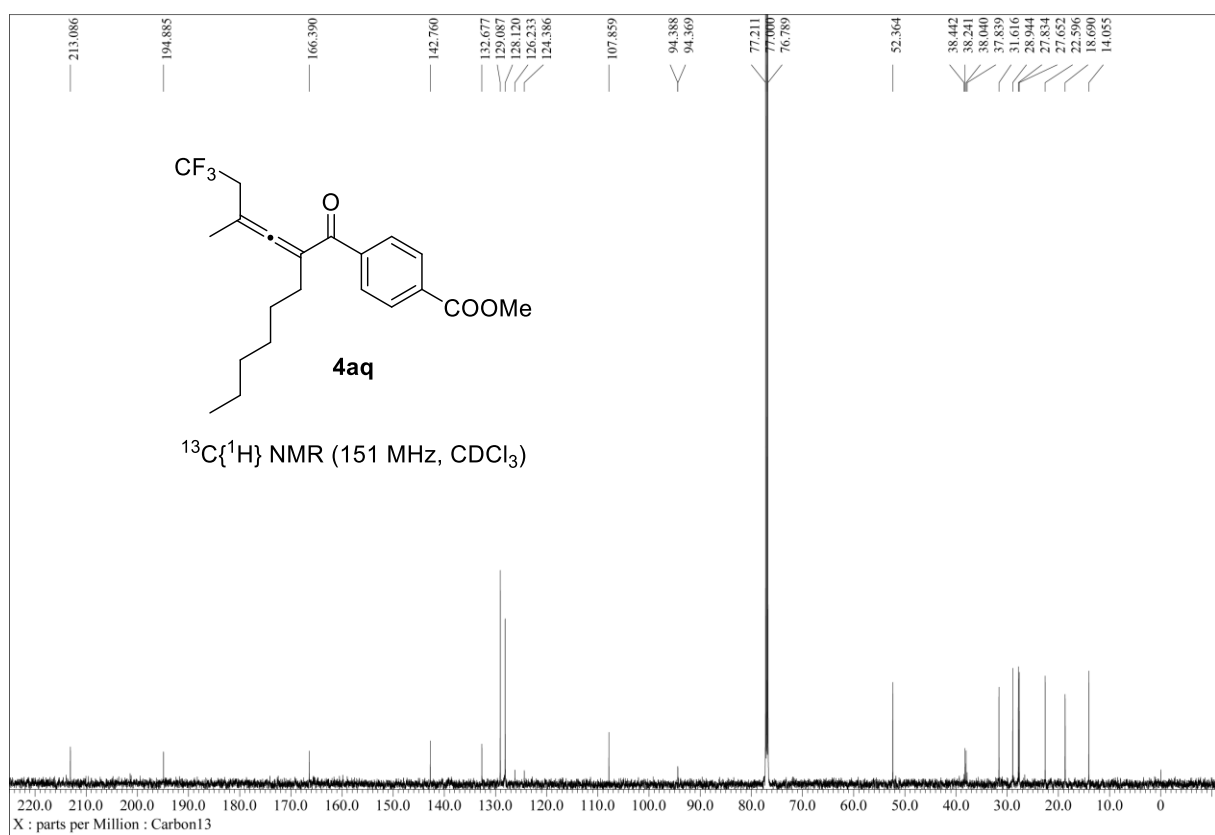

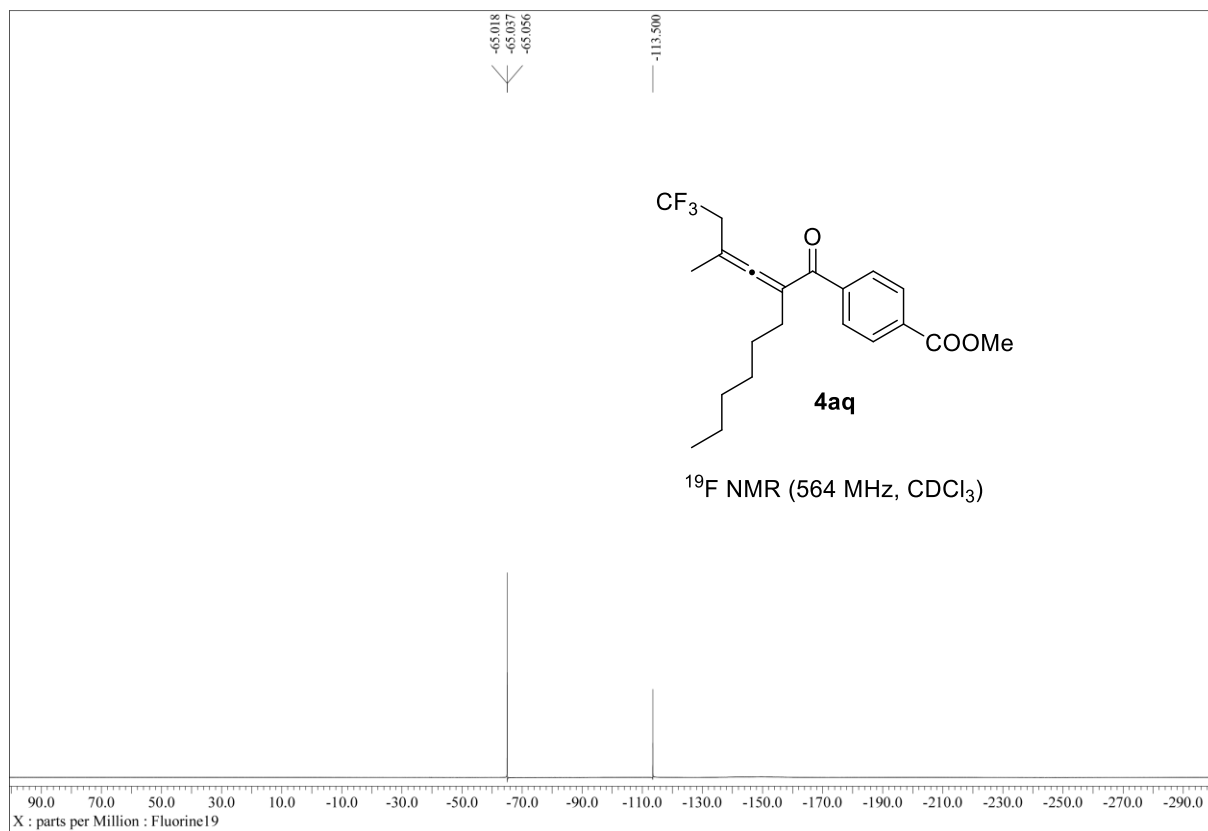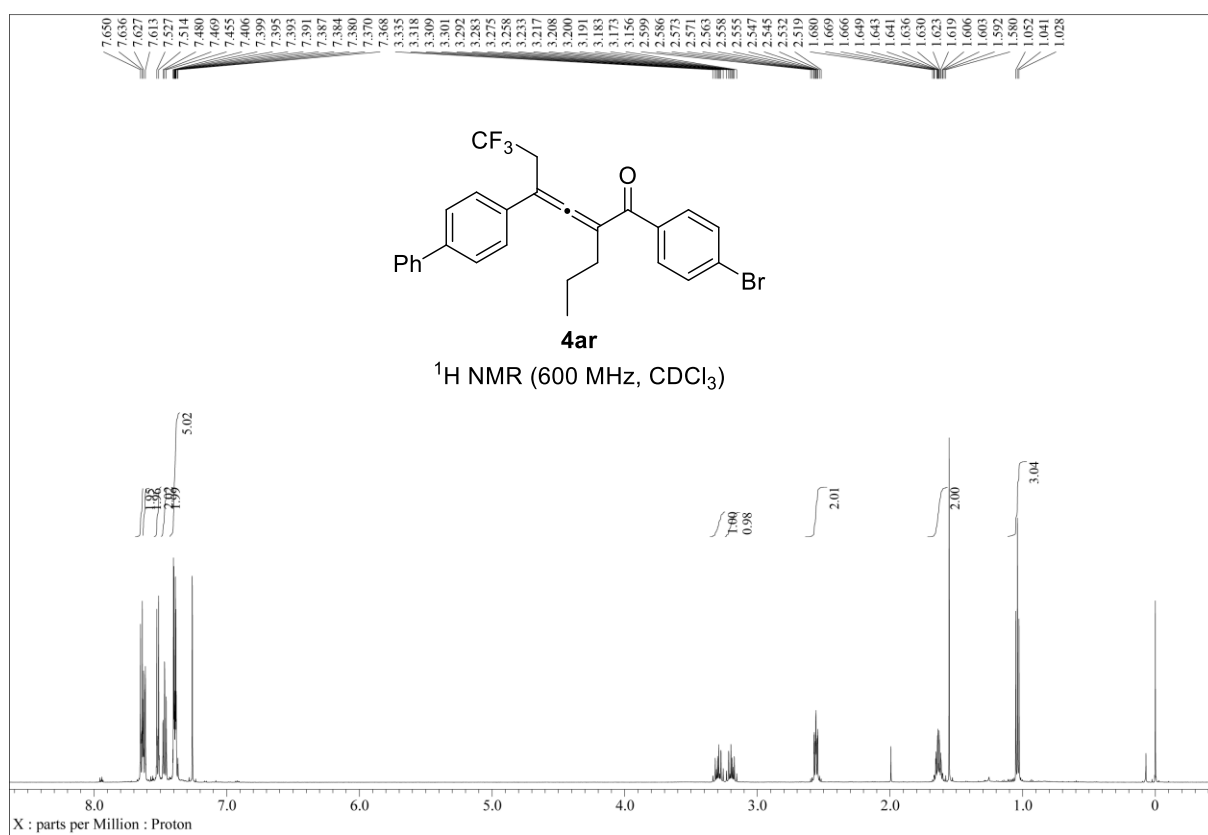

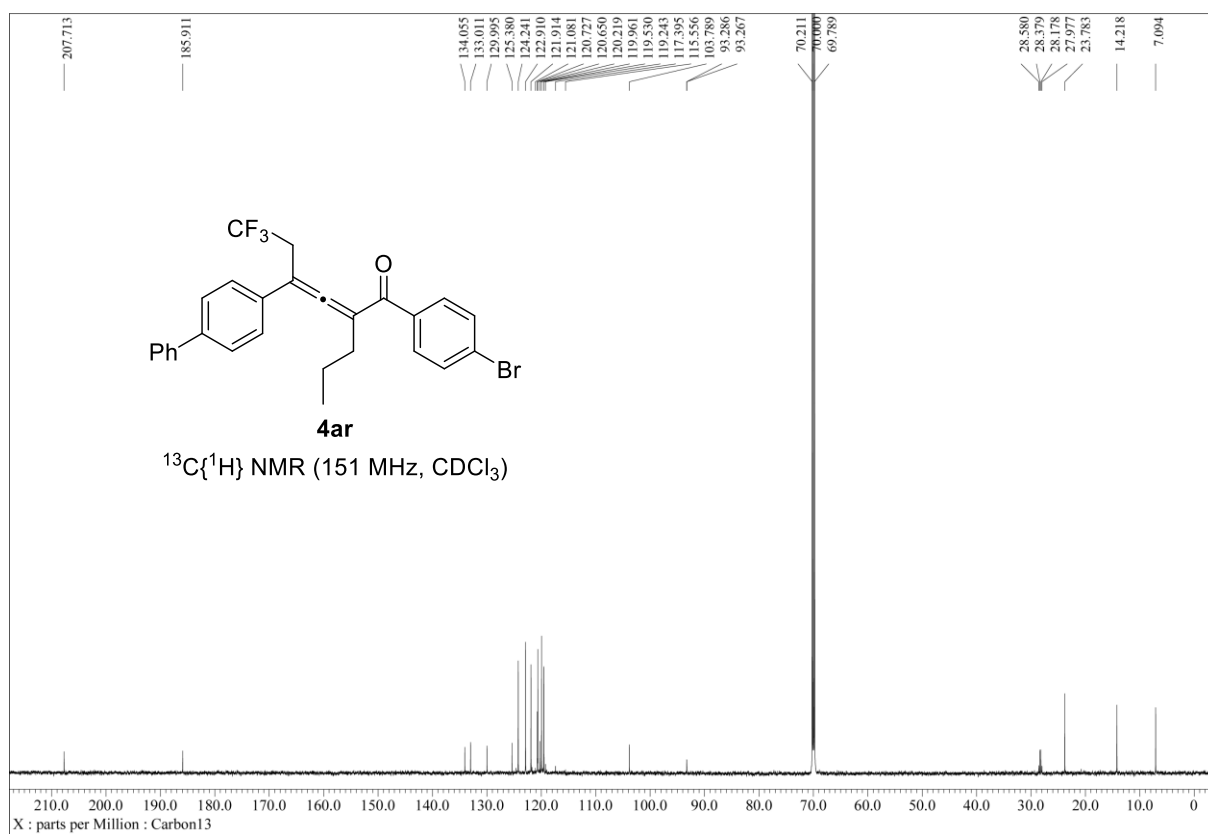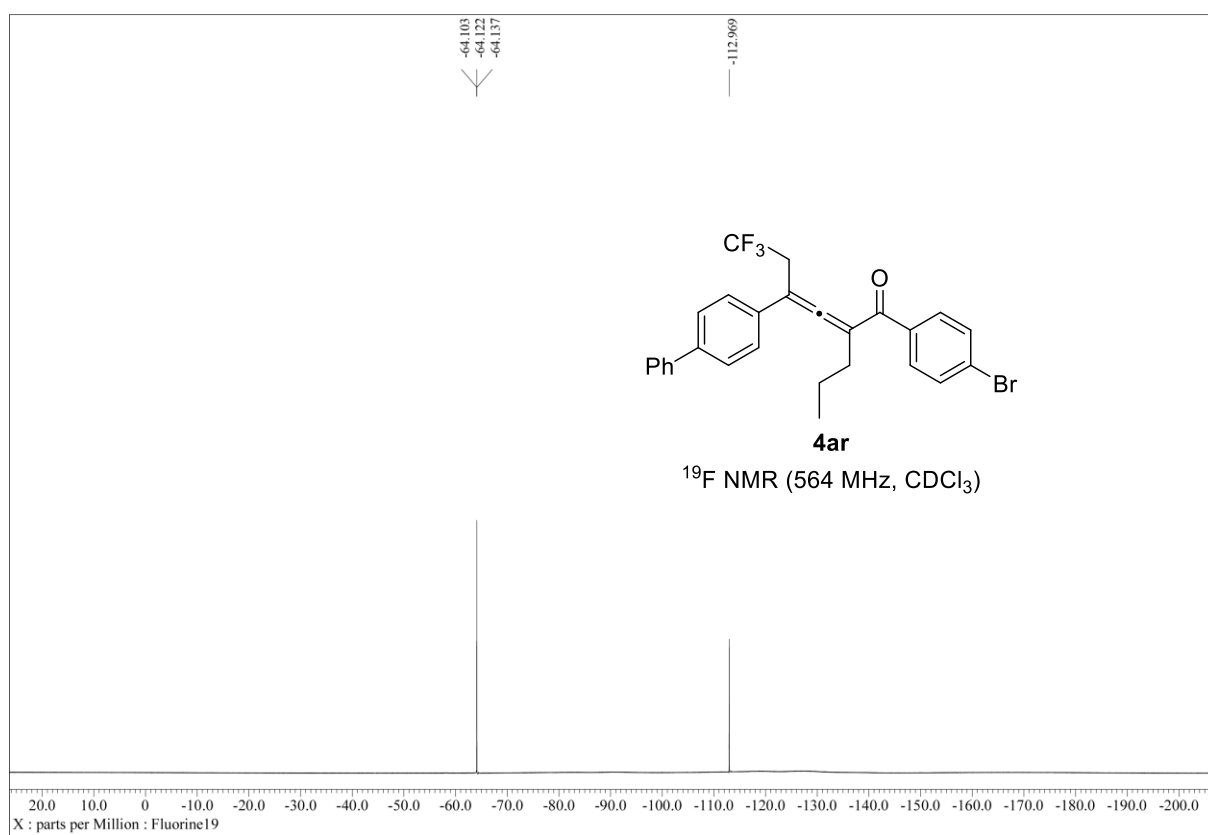

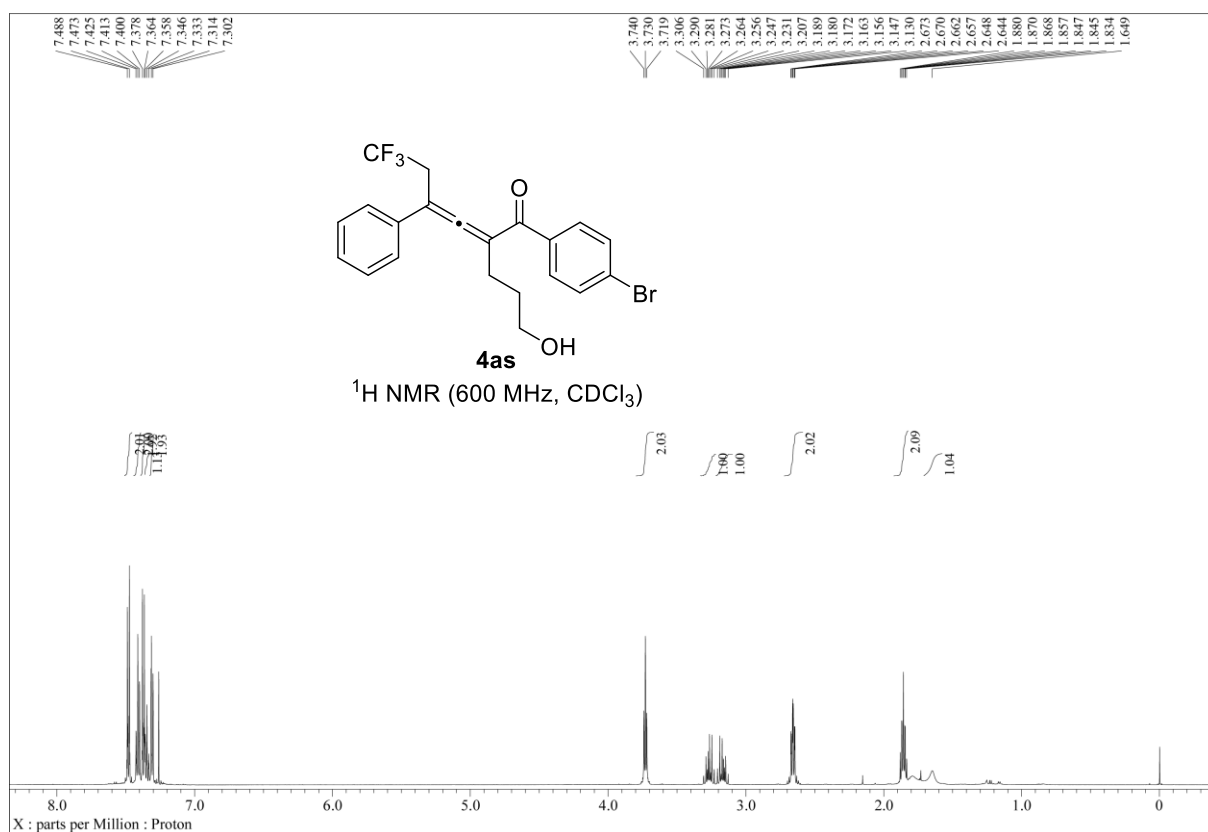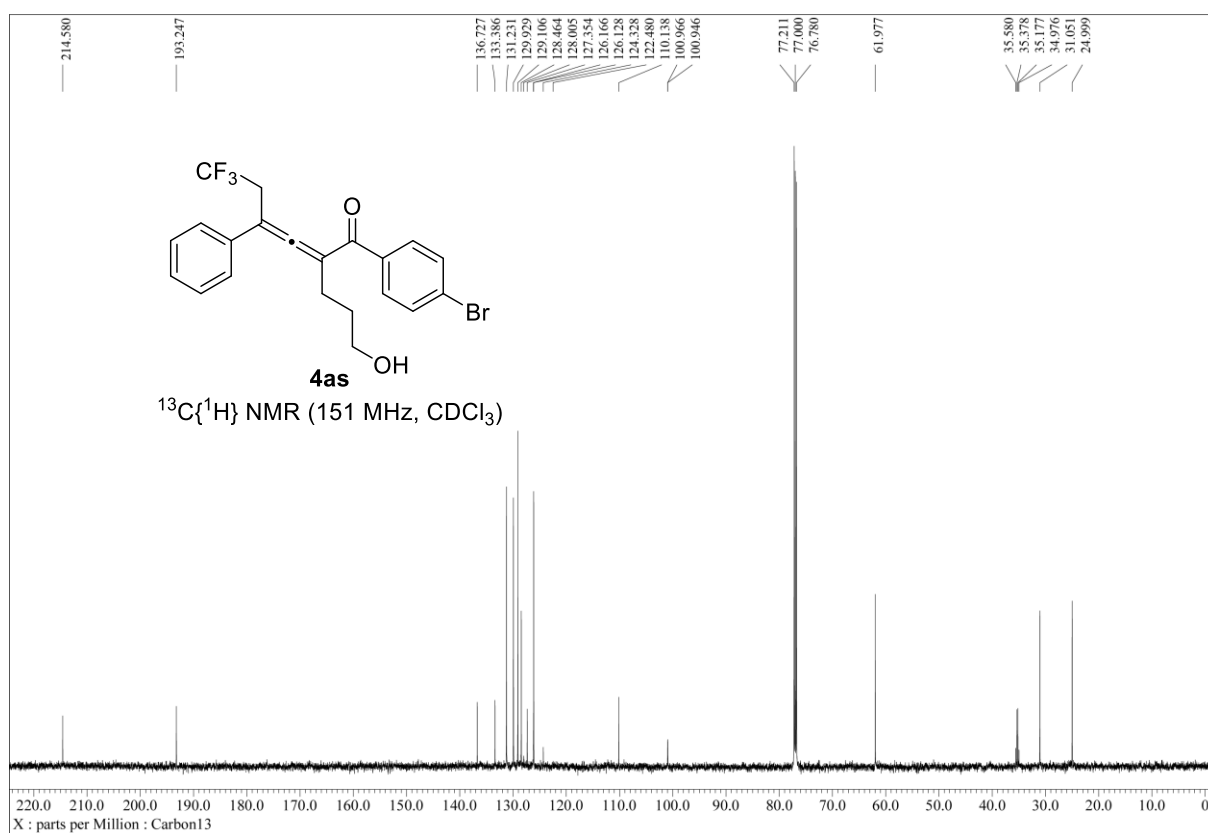

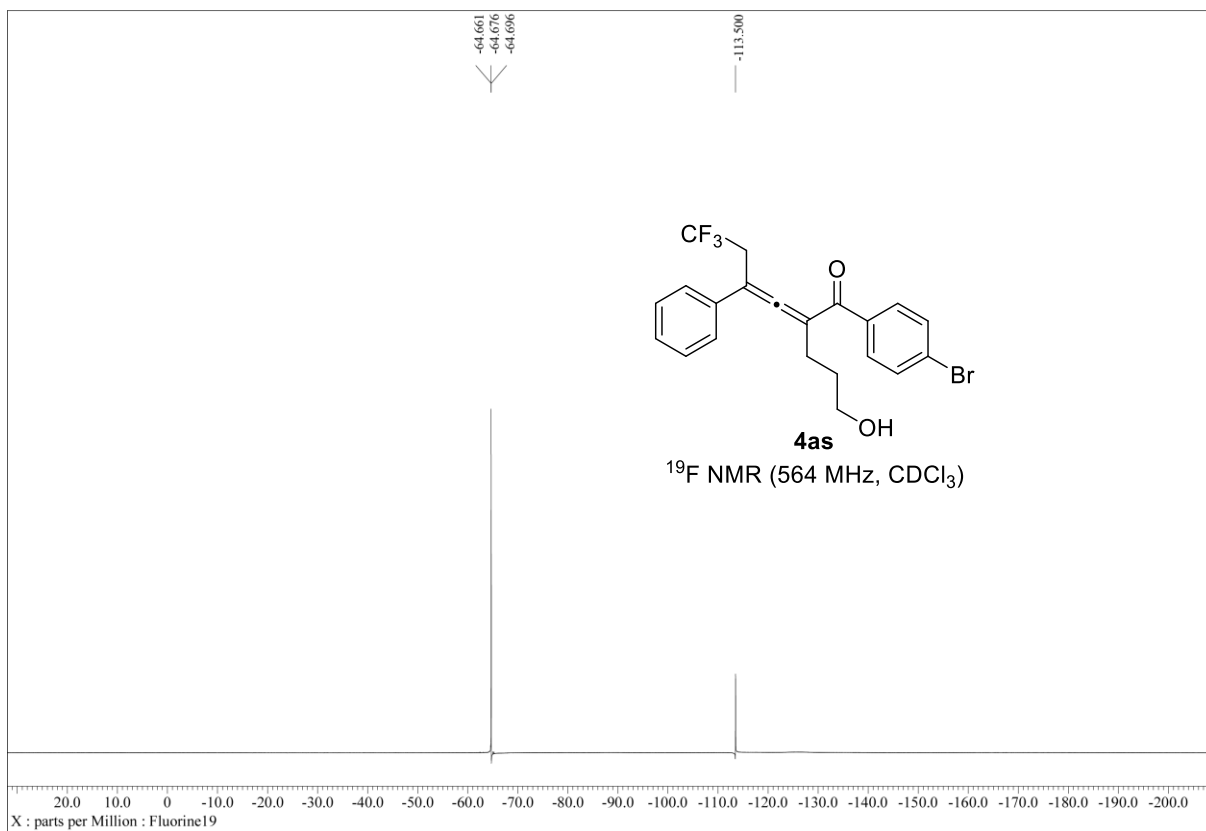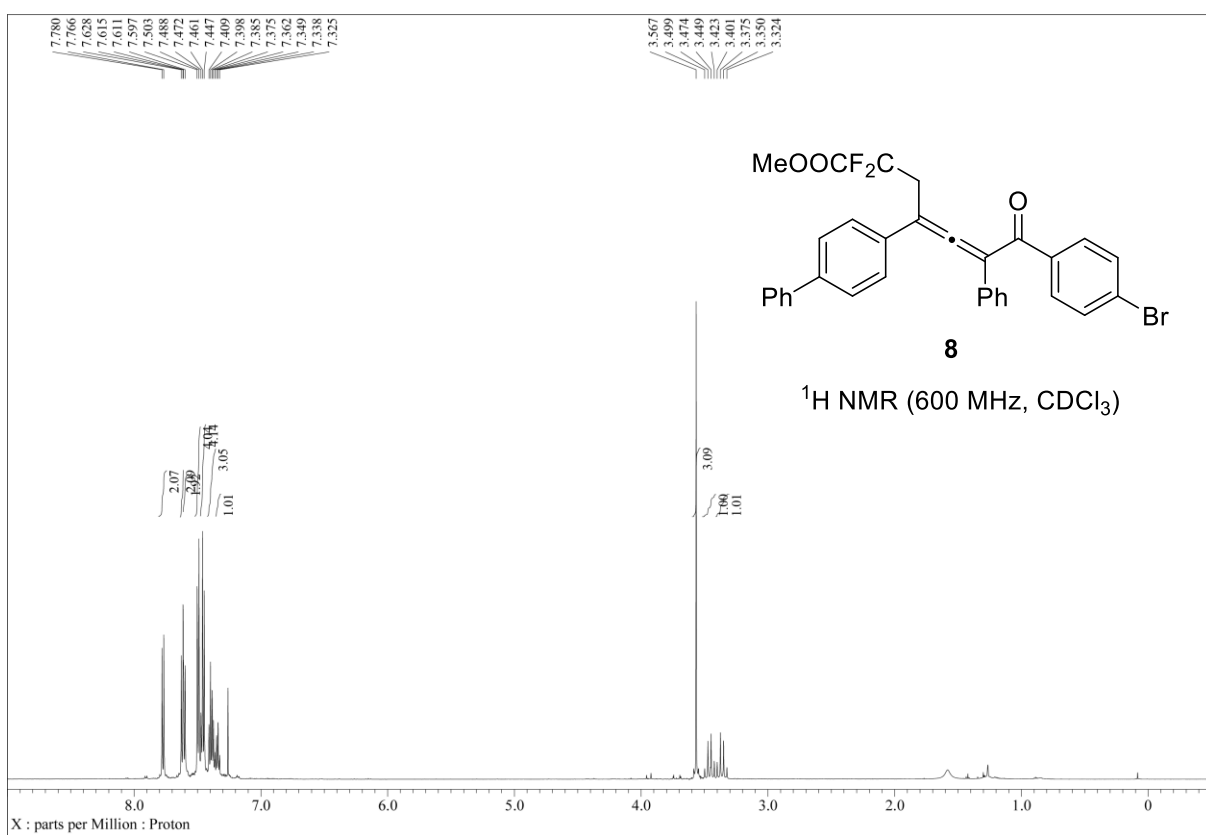

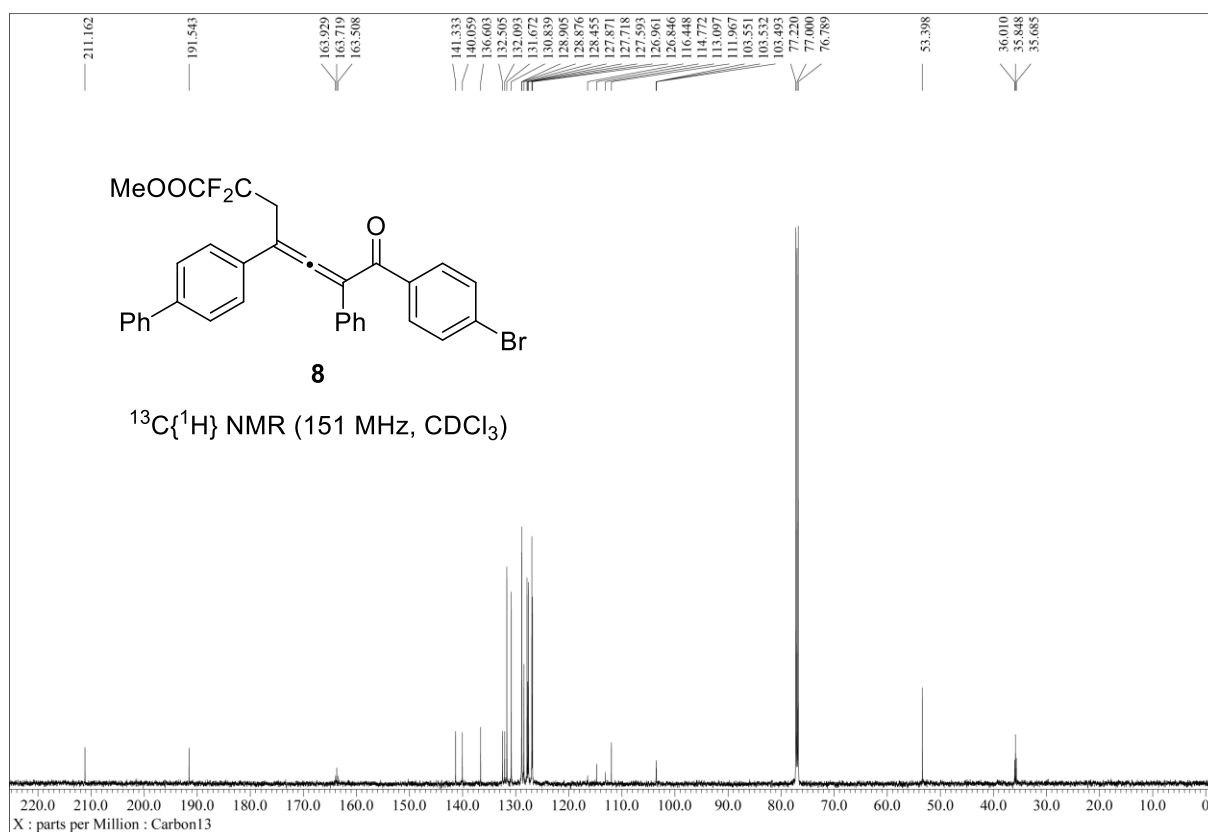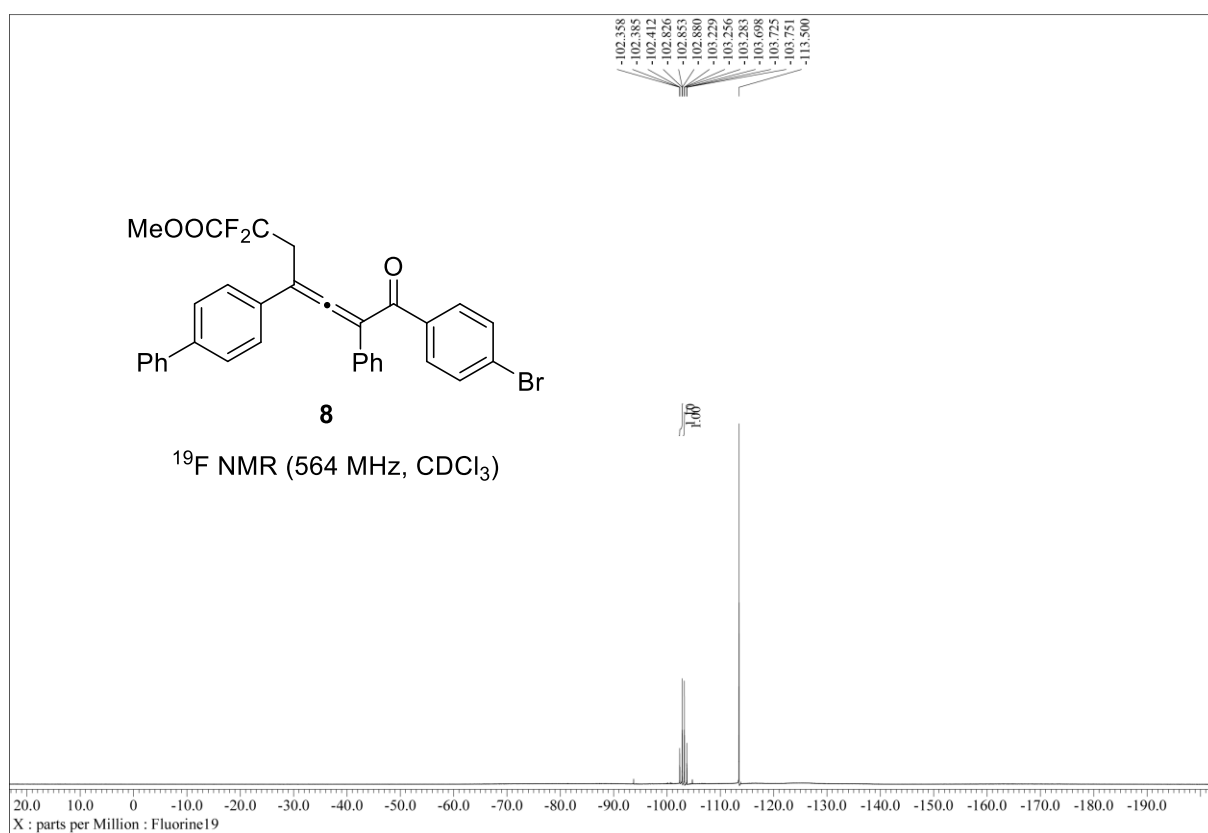



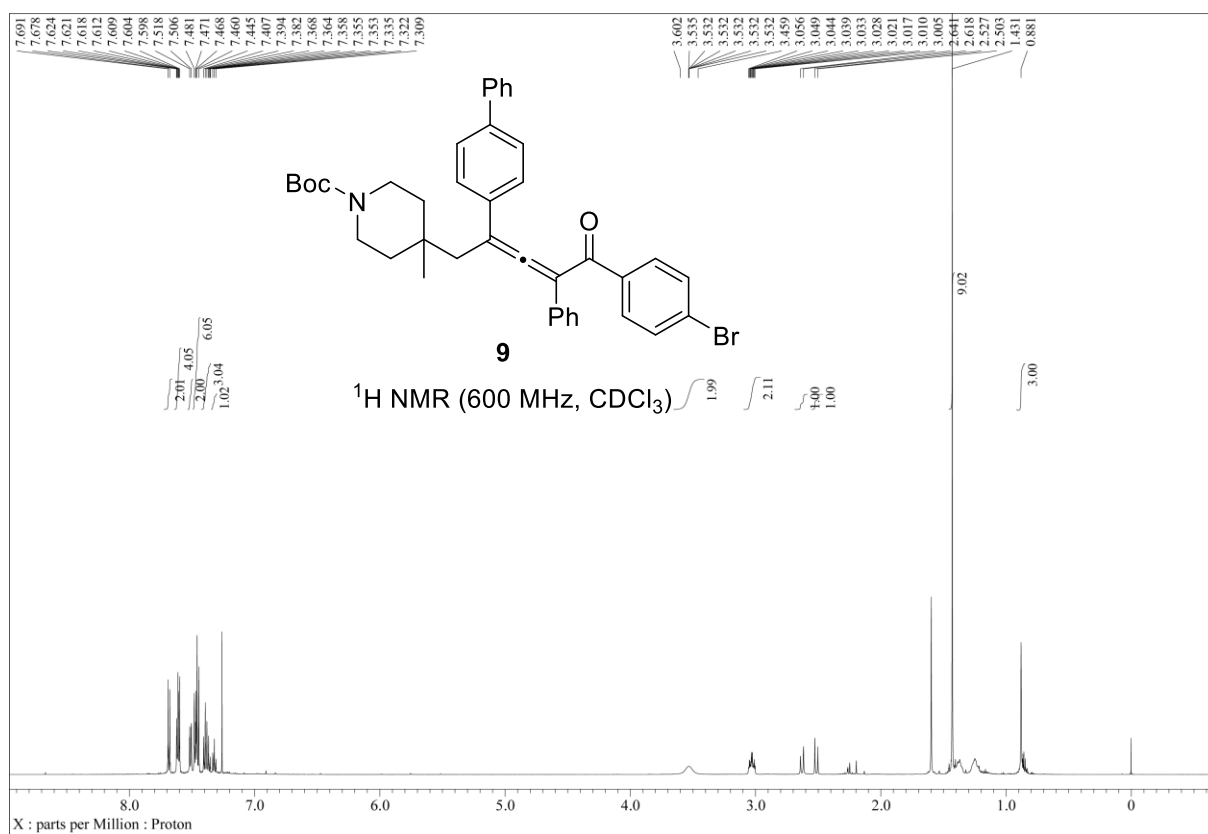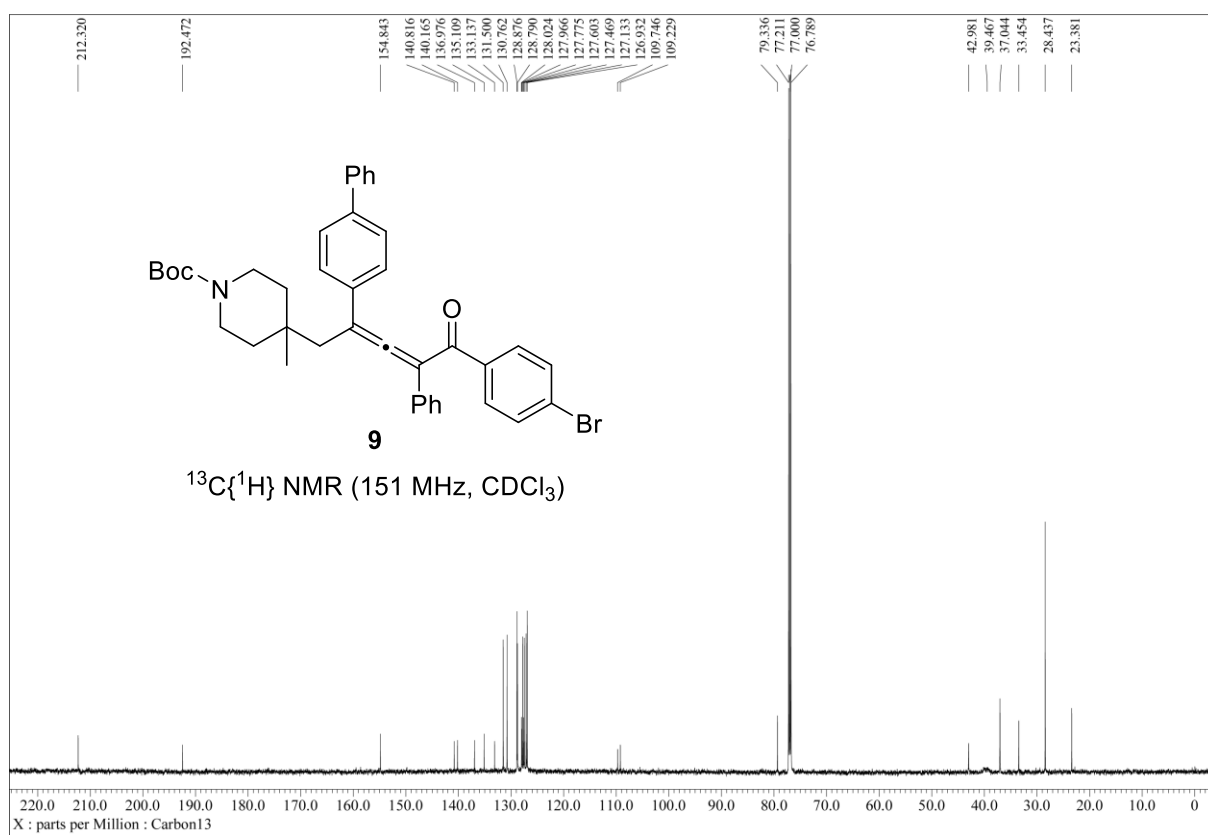

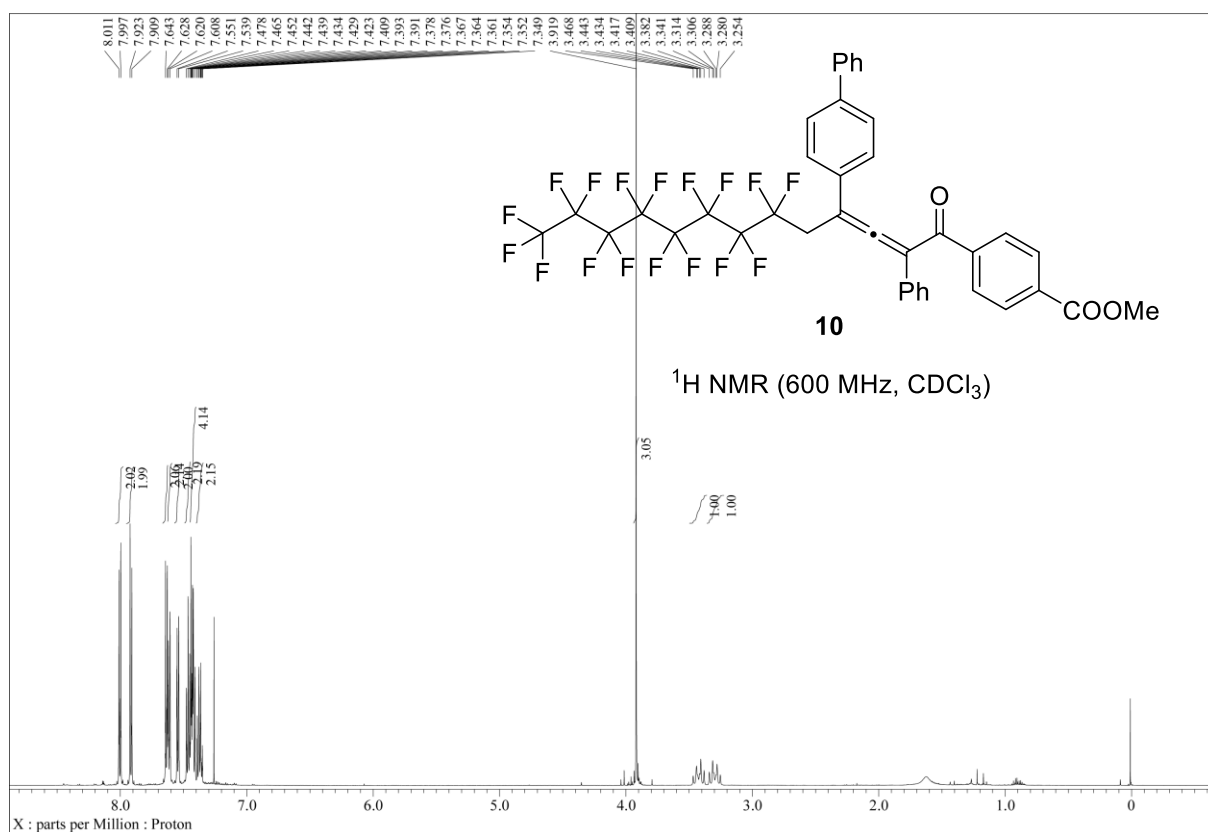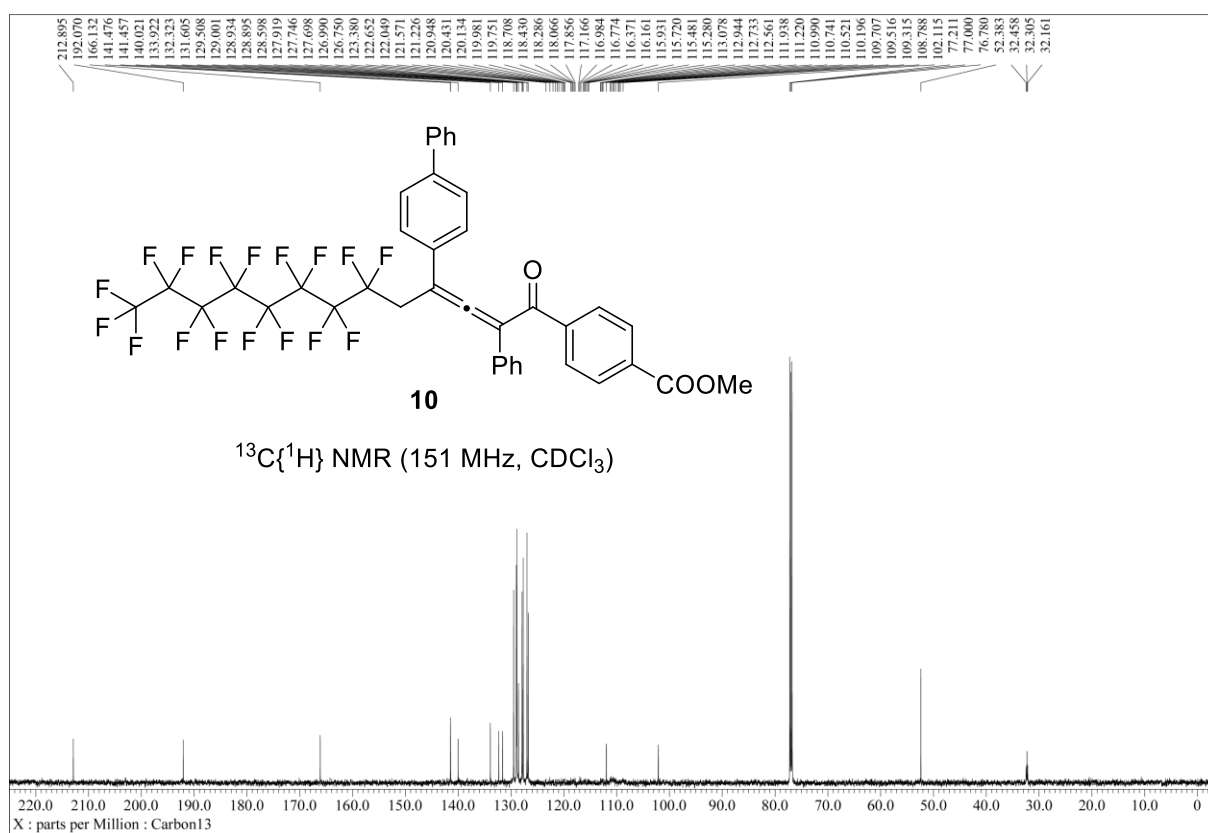

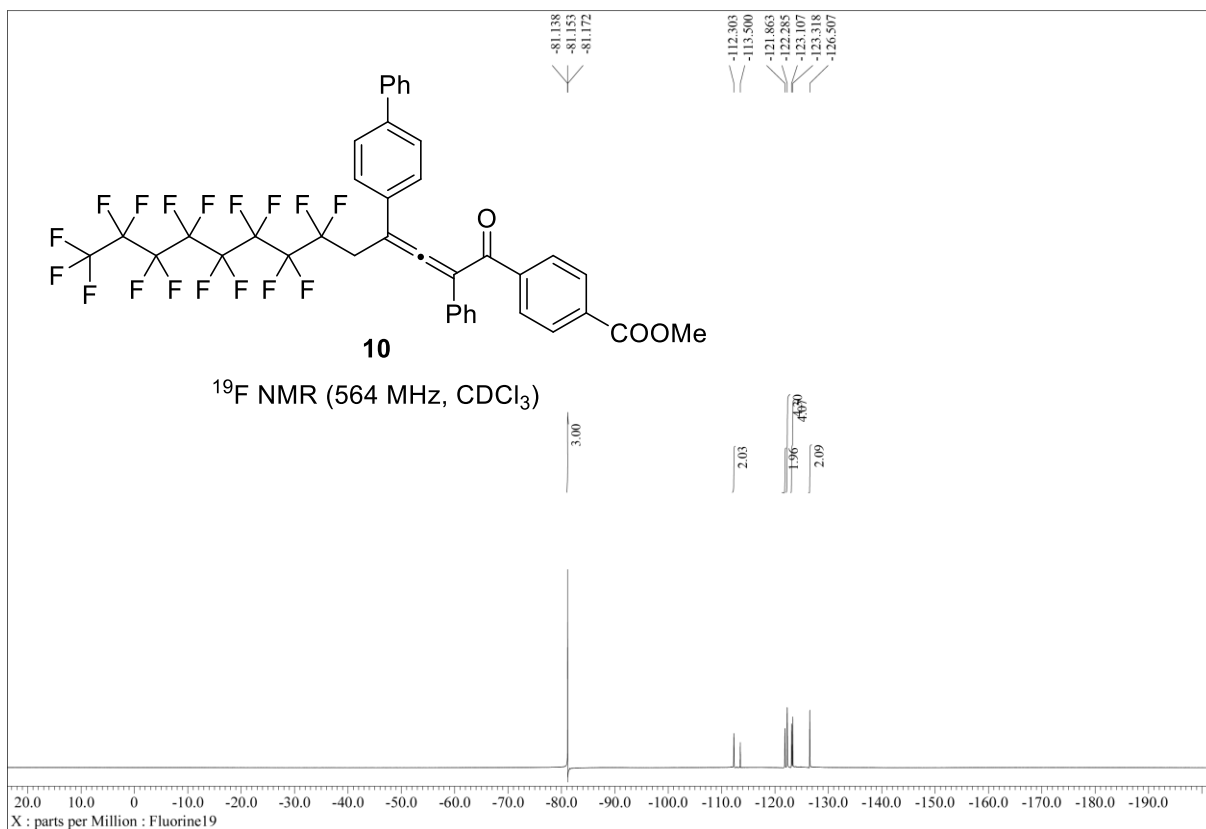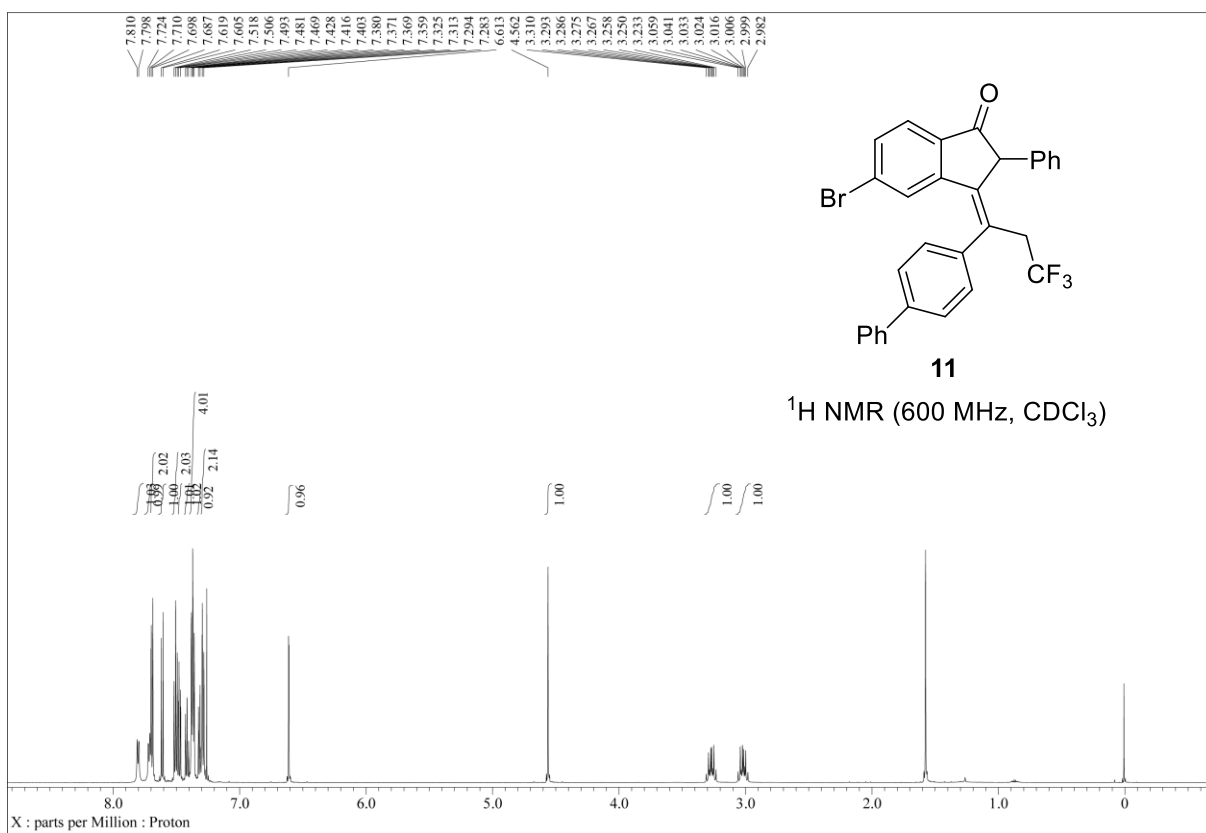

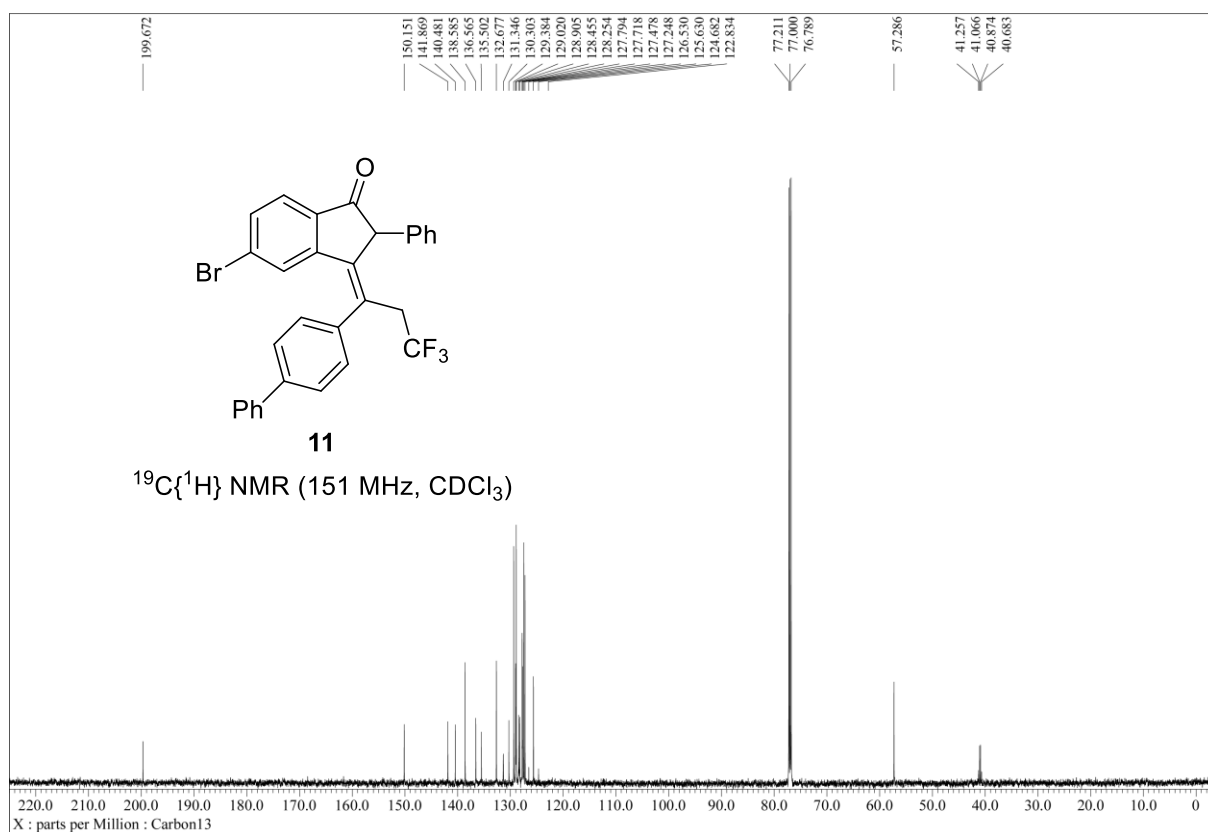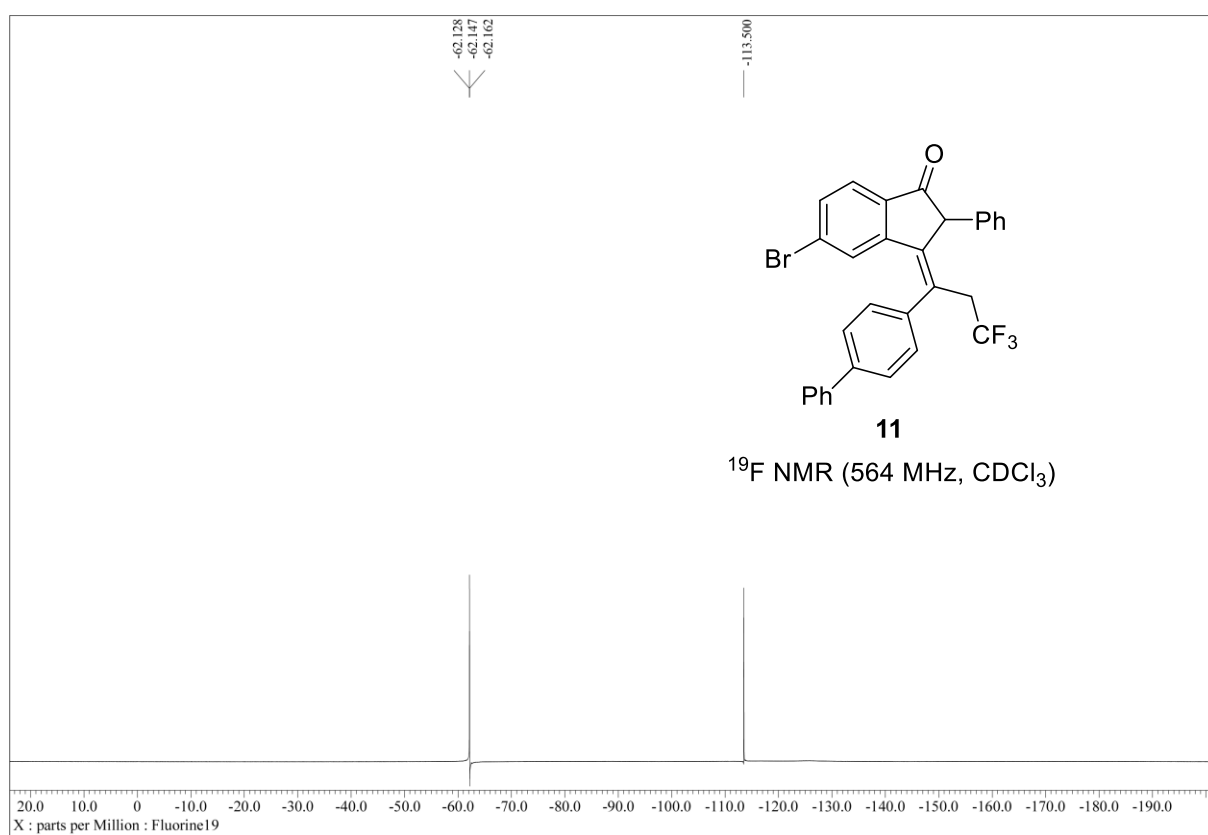



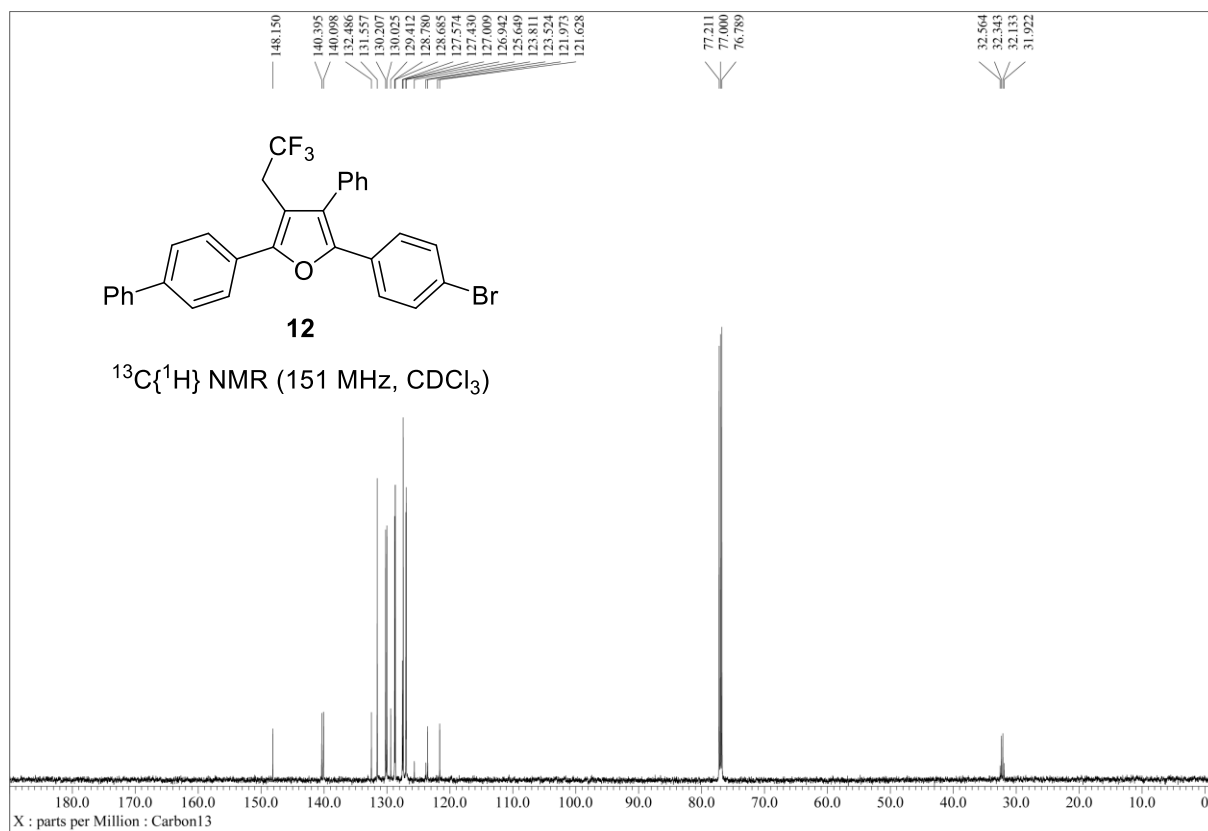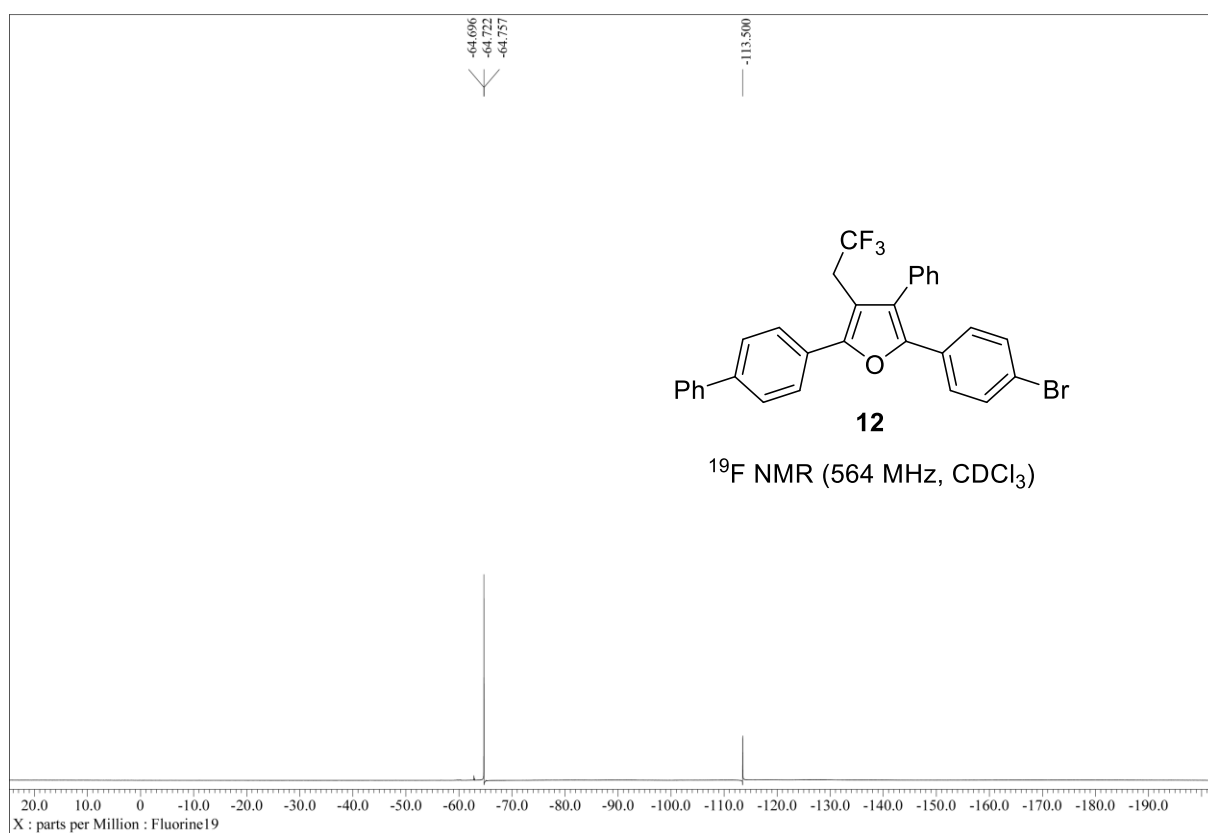

Supplement: Supplementary file 1 [file 34552102]
